# Supplementary material for: From cyclic (alkyl)(amino)carbene (CAAC) precursors to fluorinating reagents. Experimental and theoretical study
Source: Royal Society of Chemistry journal article supplement (doi:10.1039/d3dt01476b), 2023-01-01
Supplement: d3dt01476b1.pdf [file d3dt01476b1.pdf]

Supporting information

**From Cyclic (Alkyl)(Amino)Carbene (CAAC) Precursors to  
Fluorinating Reagents. Experimental and Theoretical Study.**

Evelin Gruden,<sup>a</sup> Griša Grigorij Prinčič,<sup>b</sup> Jan Hočevar,<sup>b</sup> Jernej Iskra,<sup>b</sup> Jaroslav Kvíčala,<sup>c</sup> Gašper Tavčar<sup>a,\*</sup>

<sup>a</sup> Department of Inorganic Chemistry and Technology, Jožef Stefan Institute, Jamova 39, 1000 Ljubljana, Slovenia.

<sup>b</sup> Department of Chemistry and Biochemistry, University of Ljubljana, Faculty of Chemistry and Chemical Technology, Večna pot 113, 1000 Ljubljana, Slovenia.

<sup>c</sup> Department of Organic Chemistry, University of Chemistry and Technology, Prague, Technická 5, 166 28 Prague 6.

\* Corresponding author. E-mail address: [gasper.tavcar@ijs.si](mailto:gasper.tavcar@ijs.si) (G. Tavčar).

## Table of Contents

|                                                                                                                              |     |
|------------------------------------------------------------------------------------------------------------------------------|-----|
| Table of Contents .....                                                                                                      | 2   |
| S1 Characterization of salts .....                                                                                           | 3   |
| S1.1 NMR spectroscopy.....                                                                                                   | 3   |
| S1.1.1 <sup>Me</sup> CAAC(H)F ( <b>1</b> ).....                                                                              | 3   |
| S1.1.2 Temperature dependence of <sup>Me</sup> CAAC(H)F ( <b>1</b> ) in toluene solution .....                               | 5   |
| S1.1.3 [ <sup>Me</sup> CAACH][F(HF)] ( <b>2</b> ) .....                                                                      | 6   |
| S1.1.4 Temperature dependence of [ <sup>Me</sup> CAACH][F(HF)] ( <b>2</b> ) in acetonitrile solution.....                    | 7   |
| S1.1.5 [ <sup>Me</sup> CAACH][F(HF) <sub>2</sub> ] ( <b>3</b> ) .....                                                        | 8   |
| S1.1.6 [ <sup>Me</sup> CAACH][F(HF) <sub>3</sub> ] ( <b>4</b> ) .....                                                        | 10  |
| S1.1.7 [ <sup>Me</sup> CAACH][Br] obtained from <b>3</b> .....                                                               | 11  |
| S1.1.8 [ <sup>Me</sup> CAACH][H <sub>3</sub> F <sub>4</sub> ] ( <b>4</b> ) regenerated from [ <sup>Me</sup> CAACH][Br] ..... | 12  |
| S1.2 Raman spectroscopy .....                                                                                                | 13  |
| S1.3 Crystal Structure Data.....                                                                                             | 14  |
| S1.3.1 Crystal structures.....                                                                                               | 16  |
| S2 Computational study .....                                                                                                 | 18  |
| S2.1 Fluoropyrrolidine <b>1A</b> /dihydropyrrolium fluoride <b>1B</b> system .....                                           | 18  |
| S2.2 Fluoropyrrolidine·HF <b>2A</b> /dihydropyrrolium hydrogen difluoride <b>2B</b> system.....                              | 19  |
| S2.3 Fluoropyrrolidine·2HF <b>3A</b> /dihydropyrrolium dihydrogen trifluoride <b>3B</b> system .                             | 22  |
| S2.4 Isodesmic reaction <b>1</b> + <b>3</b> → <b>2</b> + <b>2</b> .....                                                      | 23  |
| S3 Reactivity analysis.....                                                                                                  | 25  |
| S4 List of computed structures (energies in kJ/mol) .....                                                                    | 30  |
| S5 References .....                                                                                                          | 125 |

# S1 Characterization of salts

## S1.1 NMR spectroscopy

### S1.1.1 *Me*CAAC(H)F (1)

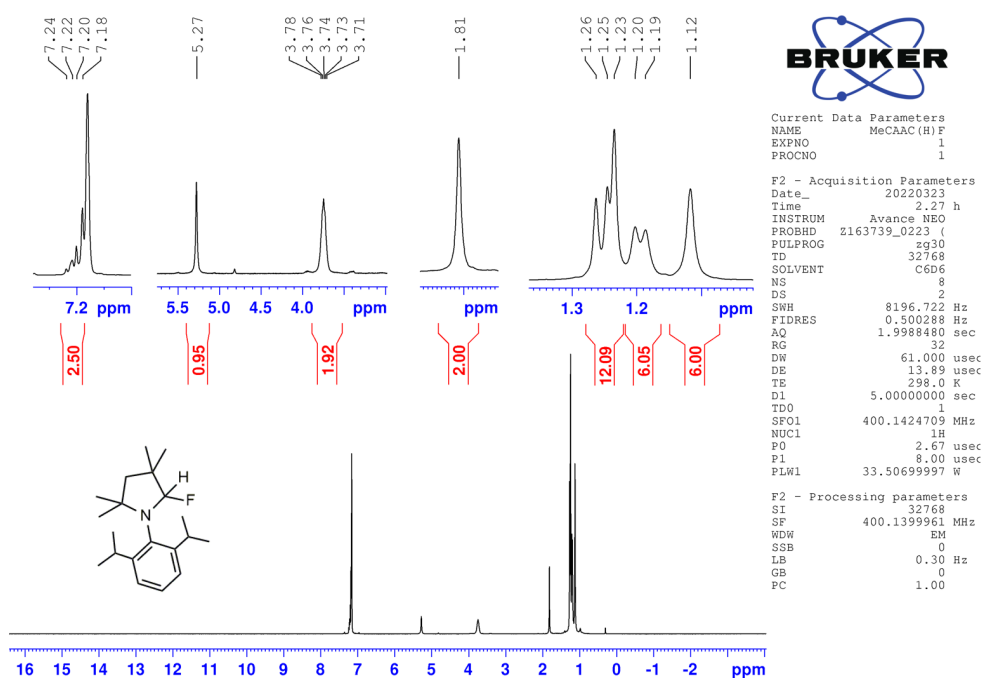

Figure S1. <sup>1</sup>H NMR spectrum of *Me*CAAC(H)F (1) in C<sub>6</sub>D<sub>6</sub> solution.

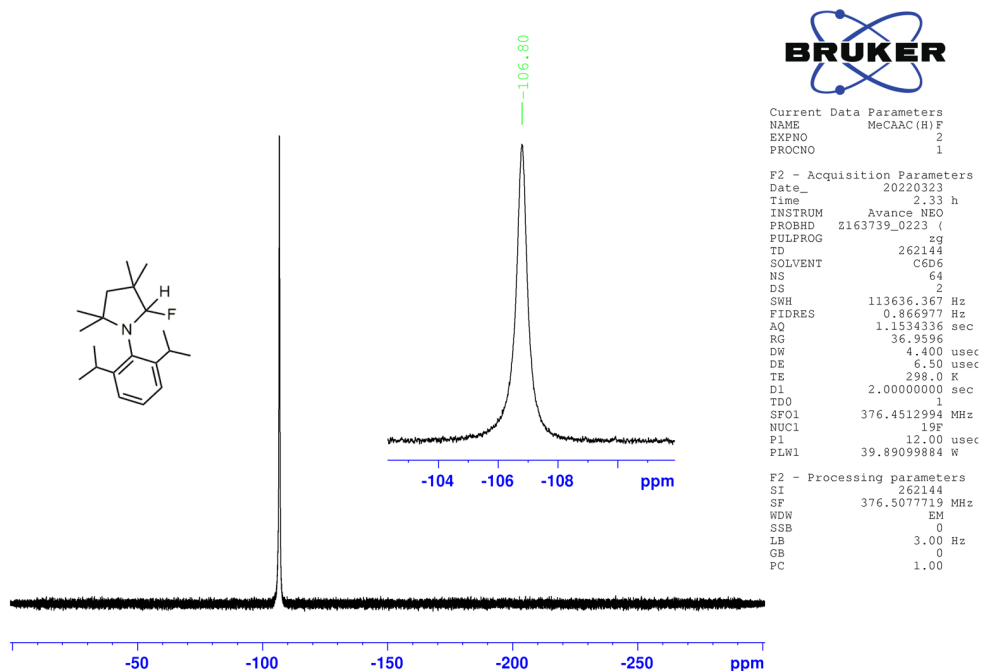

Figure S2. <sup>19</sup>F NMR spectrum *Me*CAAC(H)F (1) in C<sub>6</sub>D<sub>6</sub> solution.

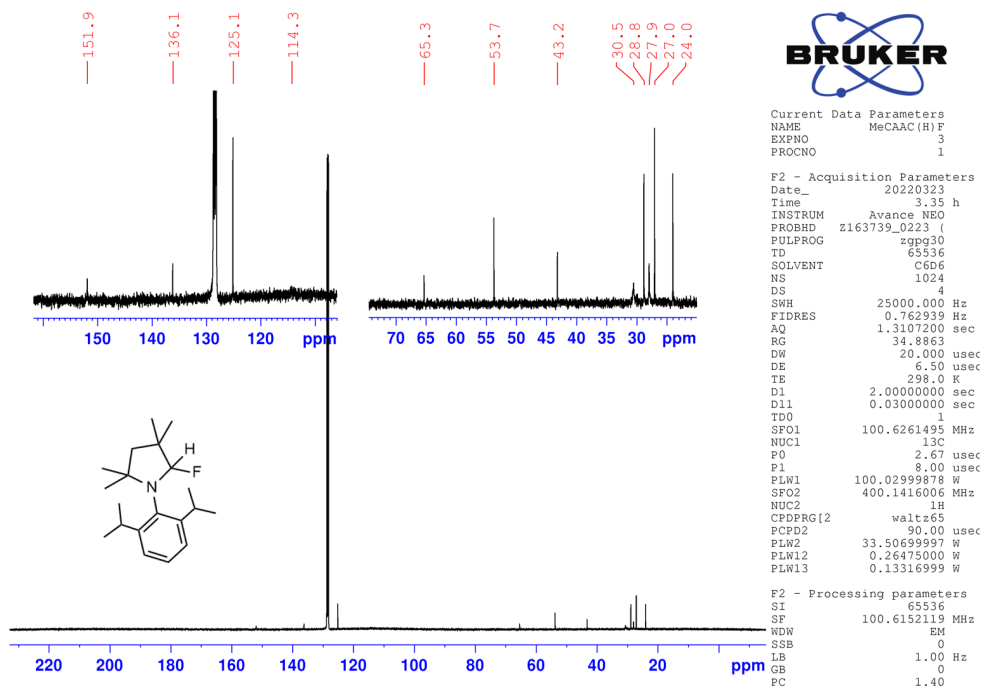

**Figure S3.**  $^{13}\text{C}\{^1\text{H}\}$  NMR spectrum  $^{\text{Me}}\text{CAAC}(\text{H})\text{F}$  (**1**) in  $\text{C}_6\text{D}_6$  solution.

*SI.1.2 Temperature dependence of <sup>Me</sup>CAAC(H)F (1) in toluene solution*

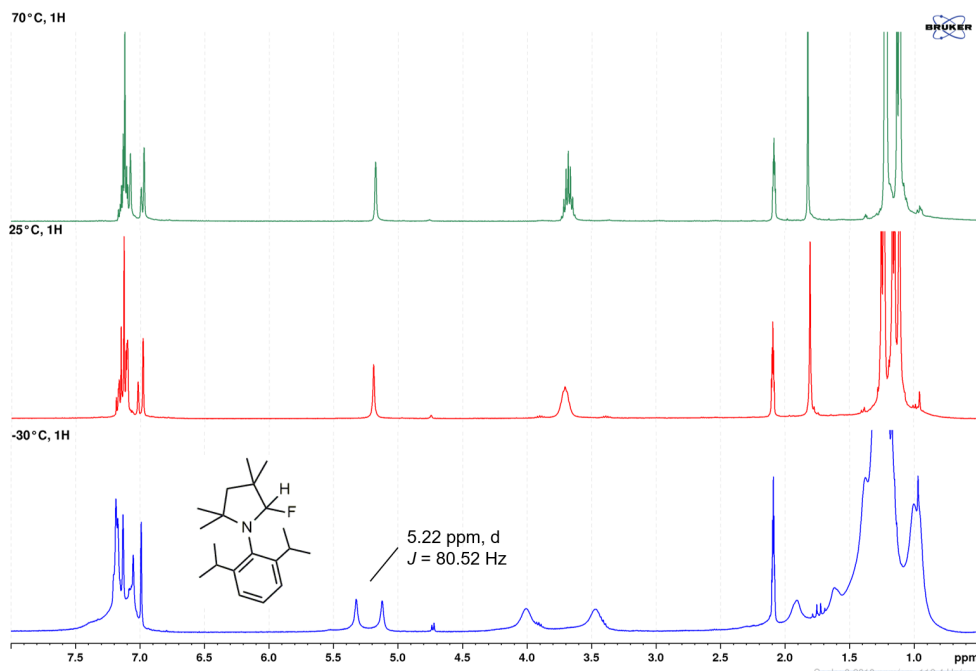

**Figure S4.** Comparison of <sup>1</sup>H NMR spectra of <sup>Me</sup>CAAC(H)F (1) in toluene solution measured at -30 °C, 25 °C and 70 °C.

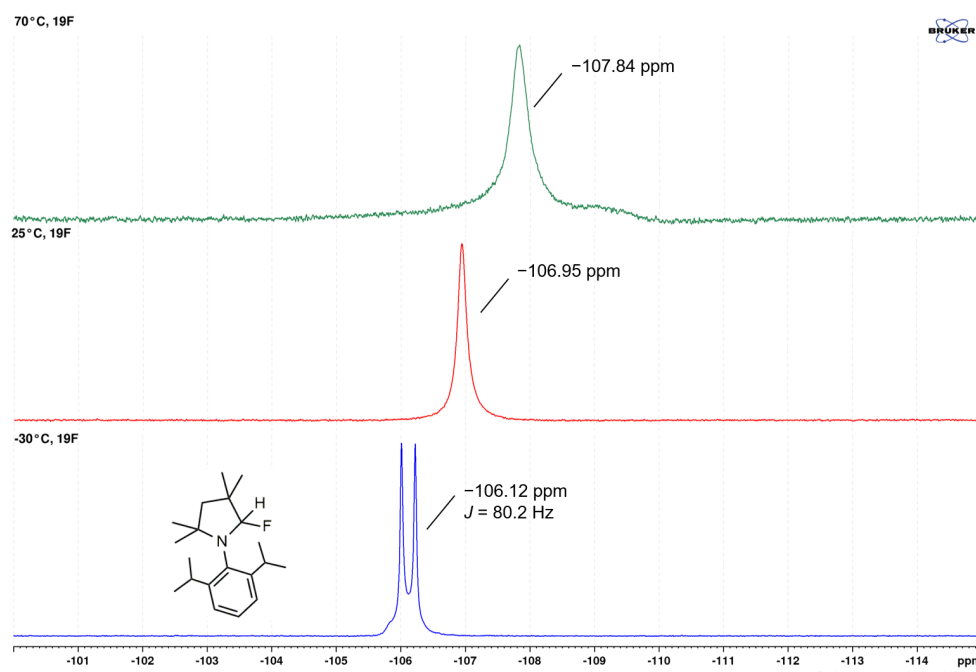

**Figure S5.** Comparison of <sup>19</sup>F NMR spectra of <sup>Me</sup>CAAC(H)F (1) in toluene solution measured at -30 °C, 25 °C and 70 °C.

SI.1.3 [<sup>Me</sup>CAACH][F(HF)] (2)

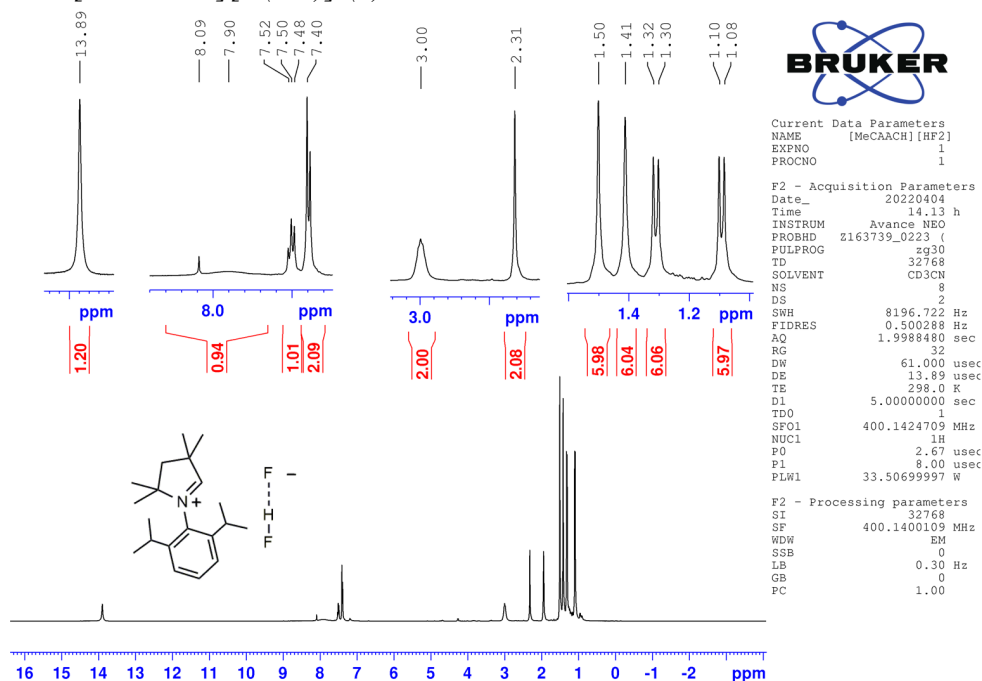

Figure S6. <sup>1</sup>H NMR spectrum of [<sup>Me</sup>CAACH][F(HF)] (2) in acetonitrile solution.

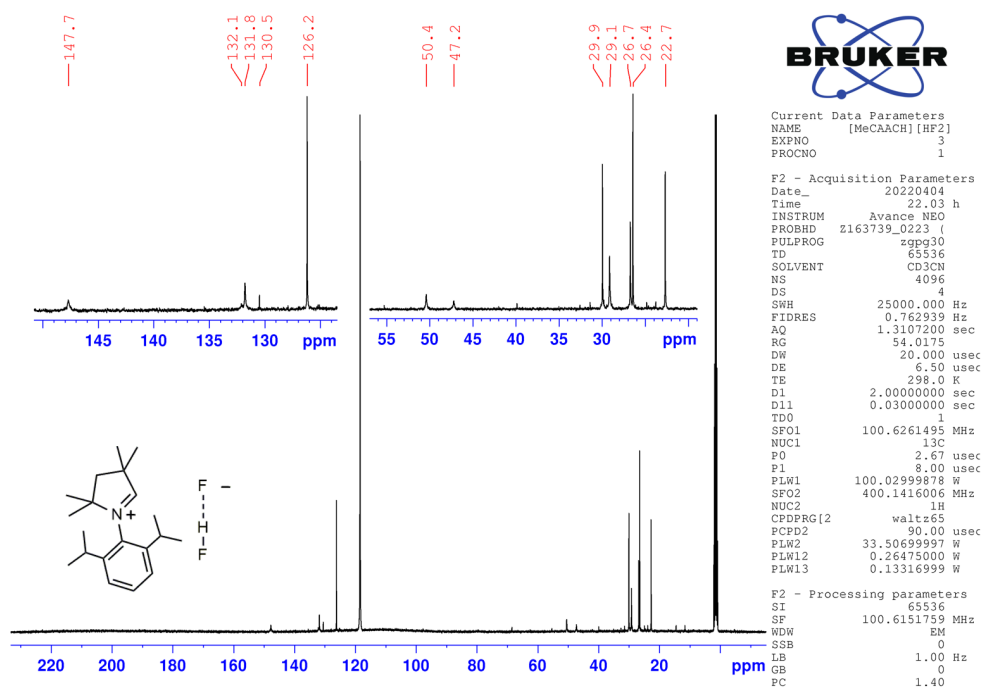

Figure S7. <sup>13</sup>C{<sup>1</sup>H} NMR spectrum of [<sup>Me</sup>CAACH][F(HF)] (2) in acetonitrile solution.

*S1.1.4 Temperature dependence of [MeCAACH][F(HF)] (2) in acetonitrile solution*

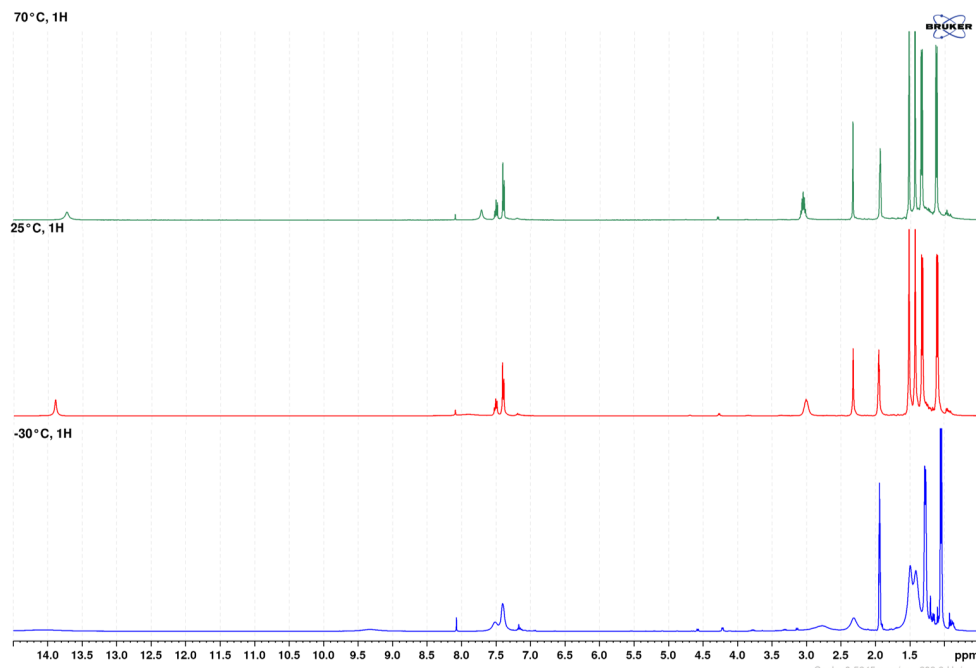

**Figure S8.** Comparison of  $^1\text{H}$  NMR spectra of  $[\text{MeCAACH}][\text{F}(\text{HF})]$  (2) in acetonitrile solution measured at  $-30^\circ\text{C}$ ,  $25^\circ\text{C}$  and  $70^\circ\text{C}$ .

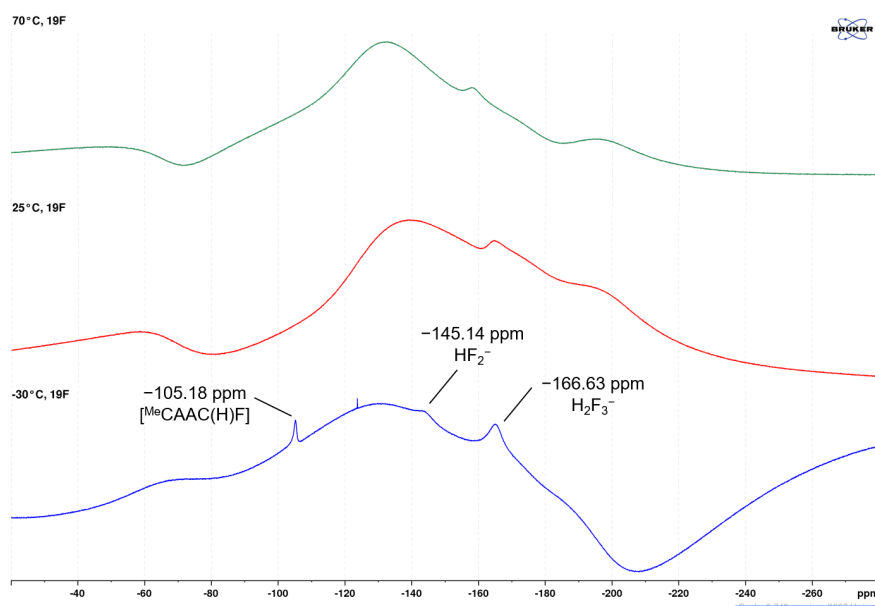

**Figure S9.** Comparison of  $^{19}\text{F}$  NMR spectra of  $[\text{MeCAACH}][\text{F}(\text{HF})]$  (2) in acetonitrile solution measured at  $-30^\circ\text{C}$ ,  $25^\circ\text{C}$  and  $70^\circ\text{C}$ .

S1.1.5 [MeCAACH][F(HF)<sub>2</sub>] (3)

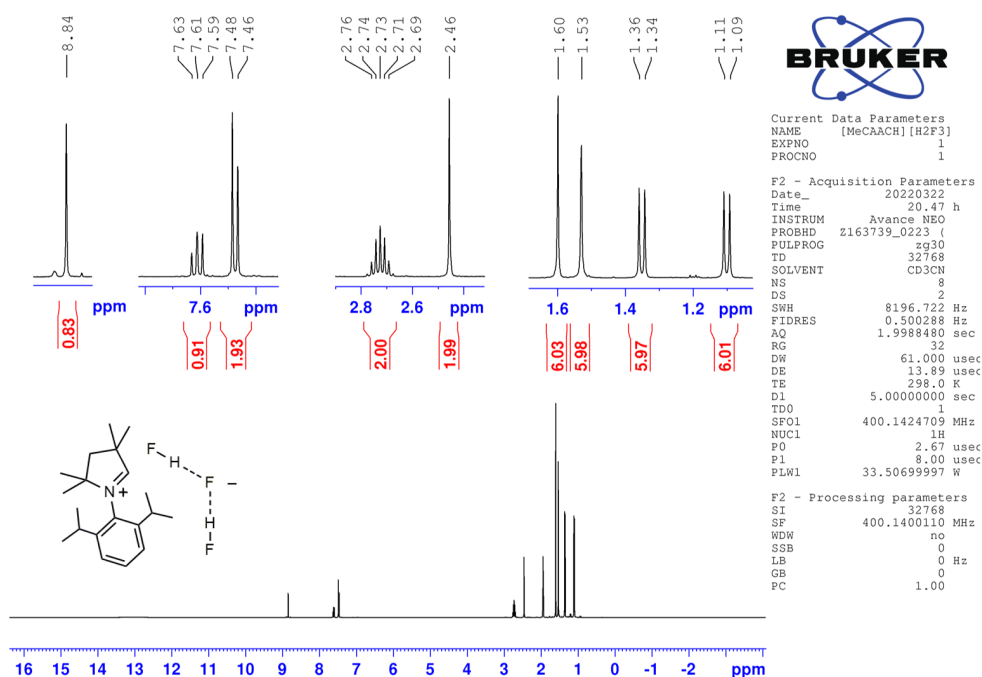

Figure S10. <sup>1</sup>H NMR spectrum of [MeCAACH][F(HF)<sub>2</sub>] (3) in acetonitrile solution.

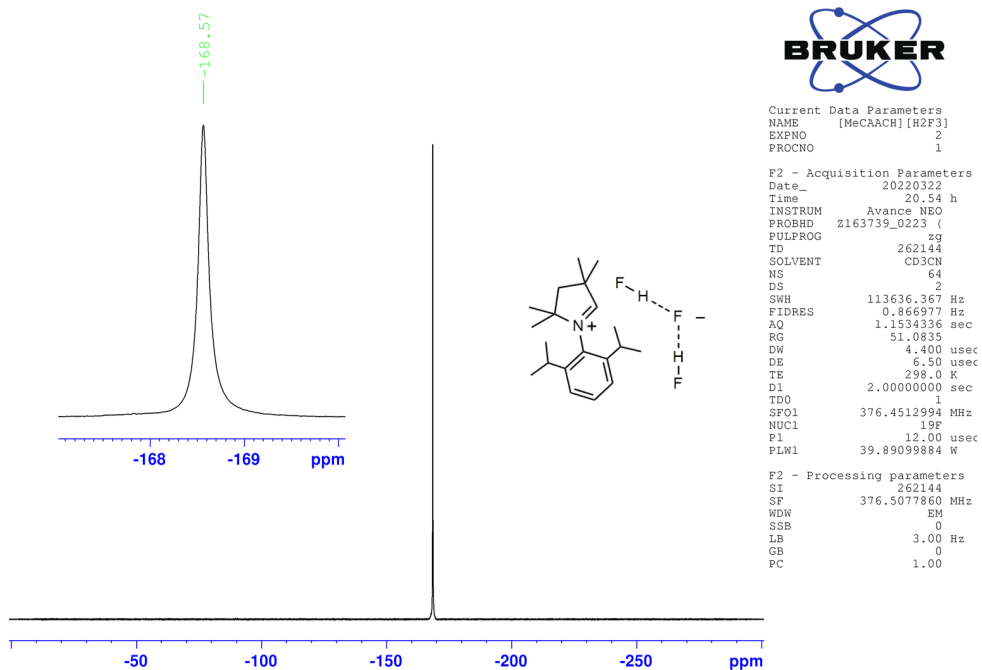

Figure S11. <sup>19</sup>F NMR spectrum [MeCAACH][F(HF)<sub>2</sub>] (3) in acetonitrile solution.



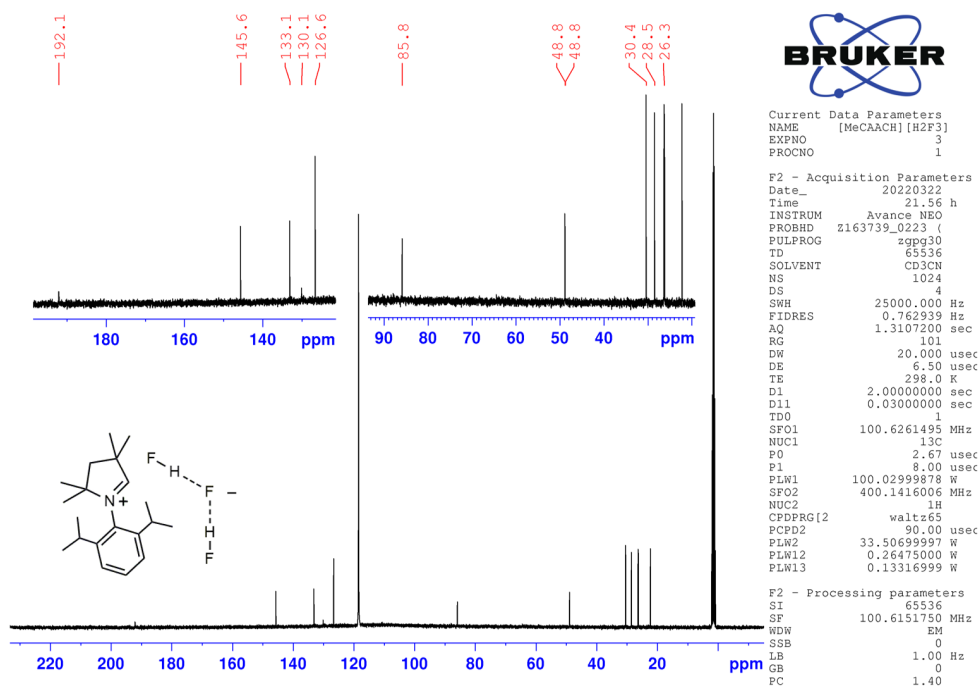

Figure S12.  $^{13}\text{C}\{^1\text{H}\}$  NMR spectrum of  $[\text{MeCAACH}][\text{F}(\text{HF})_2]$  (**3**) in acetonitrile solution.

SI.1.6 [MeCAACH][F(HF)<sub>3</sub>] (4)

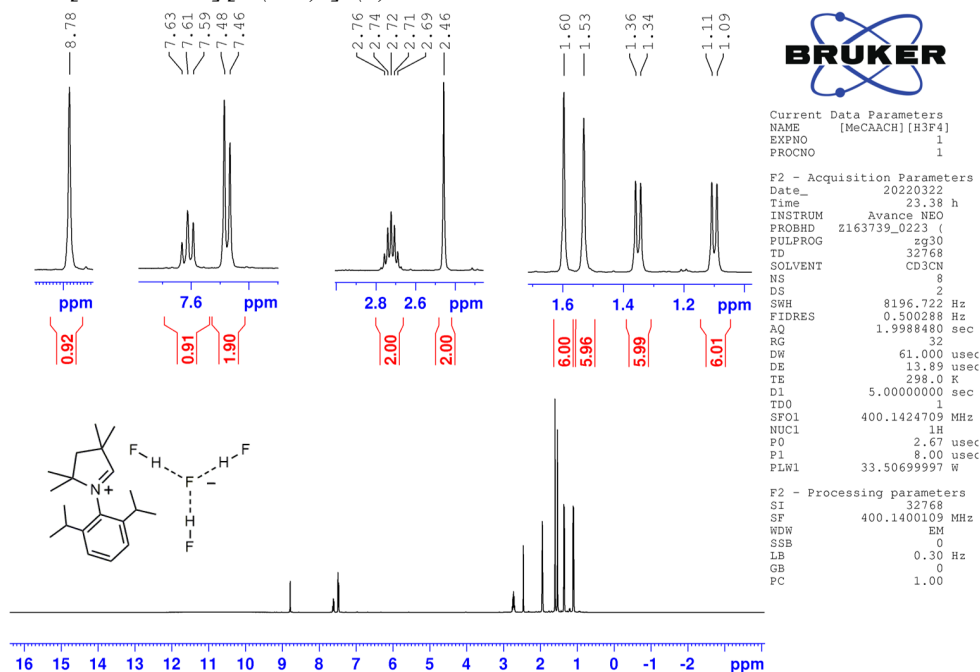

Figure S13. <sup>1</sup>H NMR spectrum of [MeCAACH][F(HF)<sub>3</sub>] (4) in acetonitrile solution.

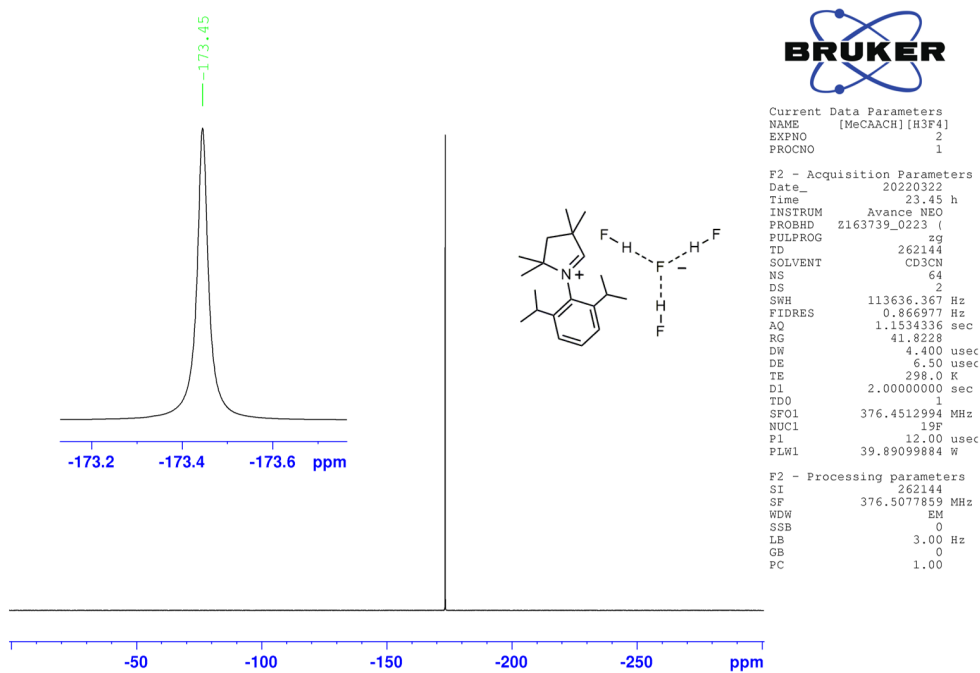

Figure S14. <sup>19</sup>F NMR spectrum [MeCAACH][F(HF)<sub>3</sub>] (4) in acetonitrile solution.

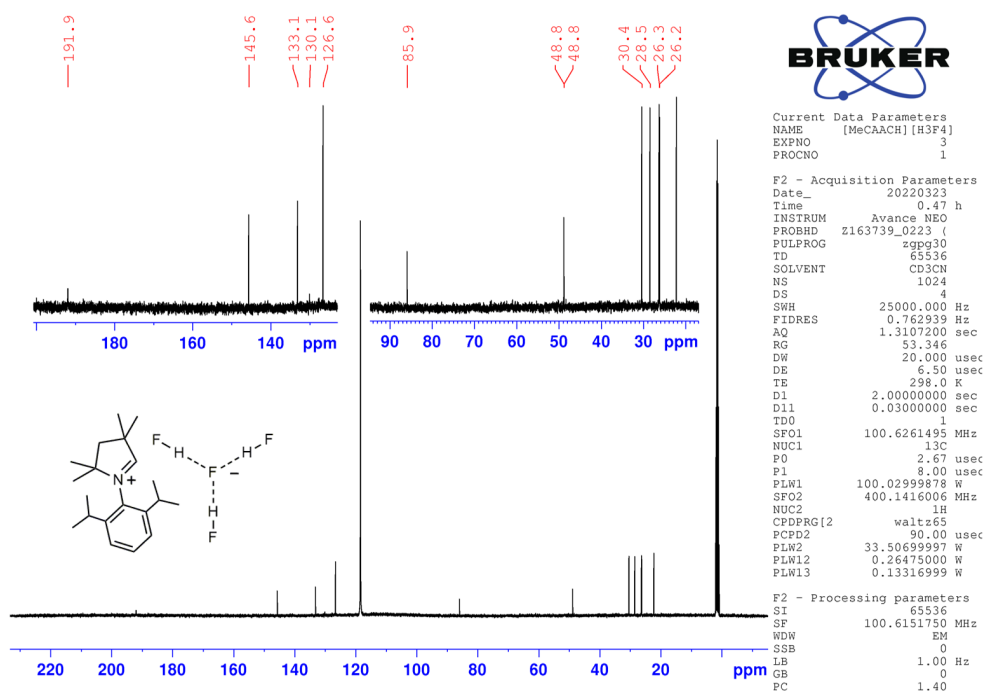

**Figure S15.**  $^{13}\text{C}\{^1\text{H}\}$  NMR spectrum of  $[\text{MeCAACH}][\text{F}(\text{HF})_3]$  (**4**) in acetonitrile solution.

### S1.1.7 $[\text{MeCAACH}][\text{Br}]$ obtained from **3**

$[\text{MeCAACH}][\text{Br}]$  was isolated with precipitation with hexane after completion of reactions between bromide substrates and reagent **3**. In  $^1\text{H}$  NMR spectrum residual peaks of dimethylformamide (DMF) and water are visible.

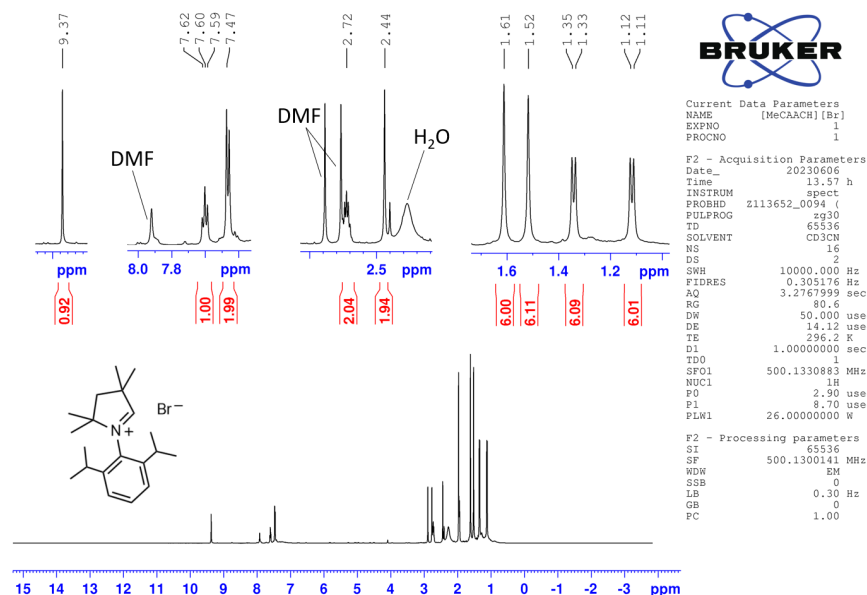

**Figure S16.**  $^1\text{H}$  NMR spectrum of  $[\text{MeCAACH}][\text{Br}]$  in acetonitrile solution.

SI.1.8 [<sup>Me</sup>CAACH][H<sub>3</sub>F<sub>4</sub>] (**4**) regenerated from [<sup>Me</sup>CAACH][Br]

[<sup>Me</sup>CAACH][Br] reacted with anhydrous HF to form a mixture of poly(hydrogen fluoride) salts. After the removal of excess HF under reduced pressure of 10<sup>-2</sup>–10<sup>-3</sup> bar compound **4** was obtained. The reaction is in agreement with the reaction described in experimental section for the chloride salt.

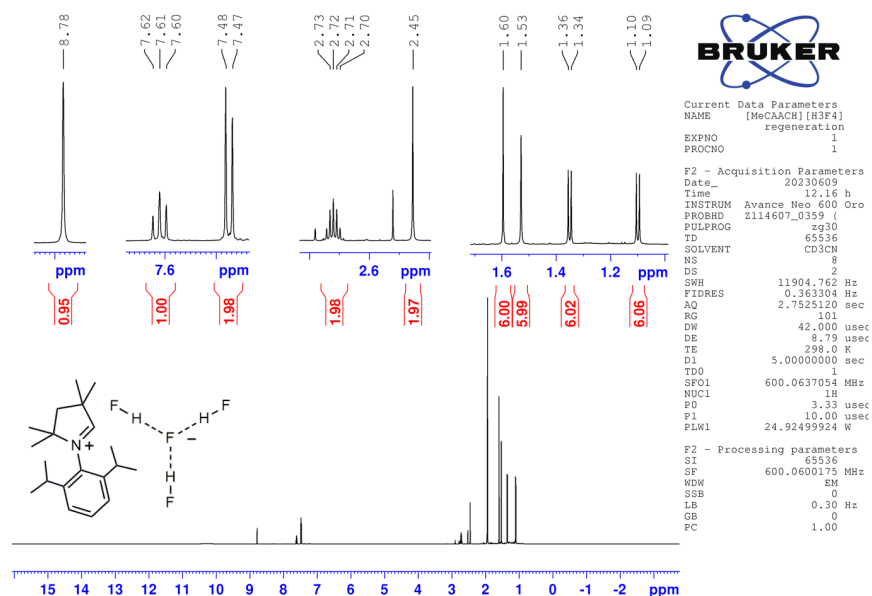

**Figure S17.** <sup>1</sup>H NMR spectrum of [<sup>Me</sup>CAACH][F(HF)<sub>3</sub>] obtained after regeneration of [<sup>Me</sup>CAACH][Br] in acetonitrile solution.

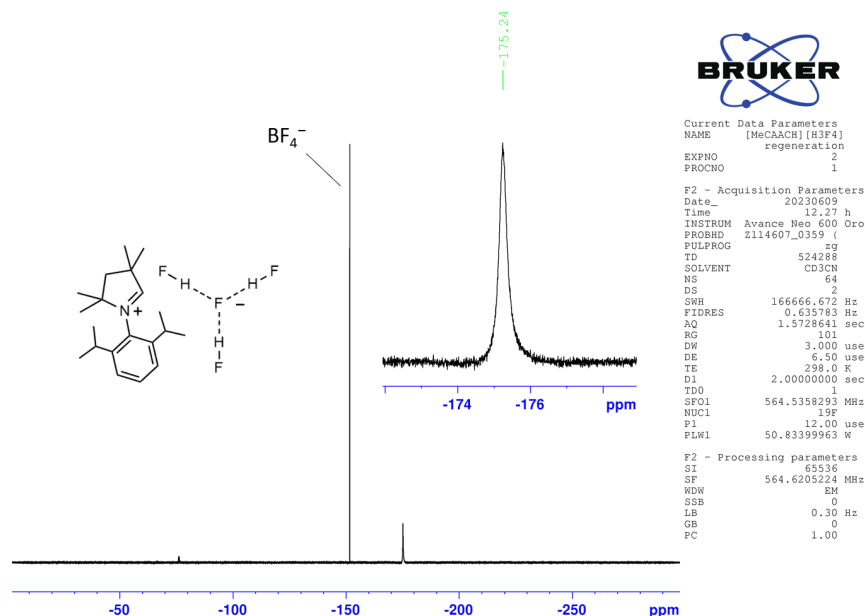

**Figure S18.** <sup>19</sup>F NMR spectrum of [<sup>Me</sup>CAACH][F(HF)<sub>3</sub>] obtained after regeneration of [<sup>Me</sup>CAACH][Br] in acetonitrile solution. At -151.8 ppm the signal for [BF<sub>4</sub>]<sup>-</sup> anion is present due to the reaction of **4** with glass.

## S1.2 Raman spectroscopy

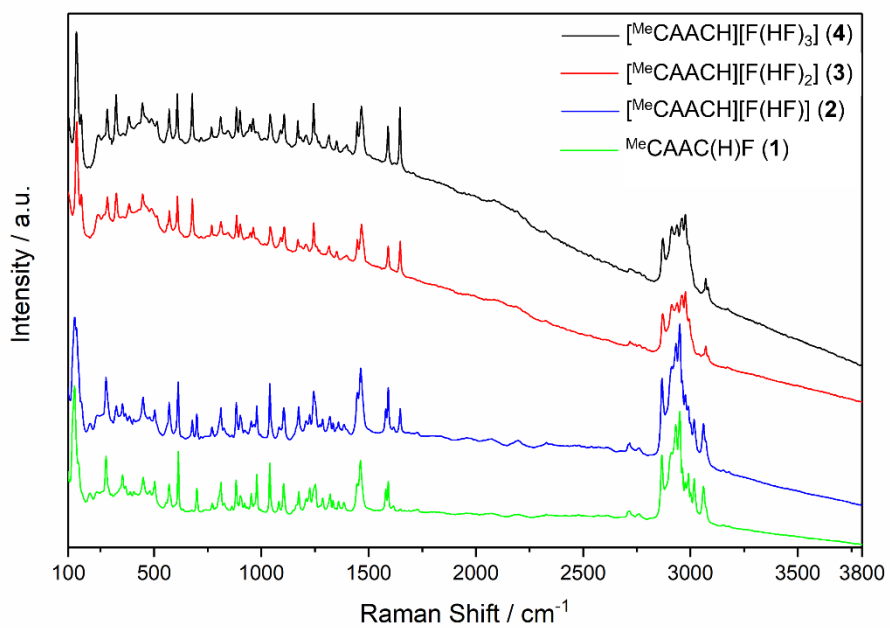

**Figure S19.** Raman spectra of MeCAAC(H)F (1), [MeCAACH][F(HF)] (2), [MeCAACH][F(HF)<sub>2</sub>] (3) and [MeCAACH][F(HF)<sub>3</sub>] (4).

### S1.3 Crystal Structure Data

**Table S1.** Selected crystal data for <sup>Me</sup>CAAC(H)F (**1**) and [<sup>Me</sup>CAACH][F(HF)]·2<sup>Me</sup>CAAC(H)F (**2a**).

|                                                                                                           | [ <sup>Me</sup> CAACHF] ( <b>1</b> )                              | [ <sup>Me</sup> CAACH][F(HF)]·<br>2 <sup>Me</sup> CAAC(H)F ( <b>2a</b> )              |
|-----------------------------------------------------------------------------------------------------------|-------------------------------------------------------------------|---------------------------------------------------------------------------------------|
| CCDC No.                                                                                                  | 2263386                                                           | 2263387                                                                               |
| Chemical formula                                                                                          | C <sub>20</sub> H <sub>32</sub> NF                                | 2C <sub>20</sub> H <sub>32</sub> NF·C <sub>20</sub> H <sub>32</sub> N·HF <sub>2</sub> |
| <i>F</i> <sub>w</sub> (g/mol)                                                                             | 305.46                                                            | 936.40                                                                                |
| <i>T</i> (K)                                                                                              | 150                                                               | 150                                                                                   |
| <i>λ</i> (Å)                                                                                              | 1.54184                                                           | 1.54184                                                                               |
| Crystal size (mm)                                                                                         | 0.34 × 0.31 × 0.23                                                | 0.35 × 0.27 × 0.12                                                                    |
| Crystal system                                                                                            | Monoclinic                                                        | Triclinic                                                                             |
| Space group                                                                                               | <i>P</i> 2 <sub>1</sub> / <i>c</i>                                | <i>P</i> -1                                                                           |
| <i>a</i> (Å)                                                                                              | 12.33810(10)                                                      | 9.3894(3)                                                                             |
| <i>b</i> (Å)                                                                                              | 12.42200(10)                                                      | 17.6755(7)                                                                            |
| <i>c</i> (Å)                                                                                              | 12.3701(2)                                                        | 17.8951(7)                                                                            |
| <i>α</i> (°)                                                                                              | 90                                                                | 96.869(3)                                                                             |
| <i>β</i> (°)                                                                                              | 106.4960(10)                                                      | 96.961(3)                                                                             |
| <i>γ</i> (°)                                                                                              | 90                                                                | 93.453(3)                                                                             |
| <i>V</i> (Å <sup>3</sup> )                                                                                | 1817.85(4)                                                        | 2918.4(2)                                                                             |
| <i>Z</i>                                                                                                  | 4                                                                 | 2                                                                                     |
| <i>ρ</i> <sub>calc</sub> (g/cm <sup>3</sup> )                                                             | 1.116                                                             | 1.066                                                                                 |
| <i>μ</i> (mm <sup>-1</sup> )                                                                              | 0.548                                                             | 0.546                                                                                 |
| <i>F</i> (000)                                                                                            | 672                                                               | 1028                                                                                  |
| <i>θ</i> range (°)                                                                                        | 3.5–76.3                                                          | 3.3–72.1                                                                              |
| Index ranges                                                                                              | –15 ≤ <i>h</i> ≤ 15<br>–15 ≤ <i>k</i> ≤ 15<br>–14 ≤ <i>l</i> ≤ 15 | –11 ≤ <i>h</i> ≤ 11<br>–21 ≤ <i>k</i> ≤ 21<br>–22 ≤ <i>l</i> ≤ 22                     |
| Reflections collected                                                                                     | 4451                                                              | 11761                                                                                 |
| Independent reflections                                                                                   | 4451                                                              | 11761                                                                                 |
| Reflections with ( <i>I</i> > 2σ( <i>I</i> ))                                                             | 4089                                                              | 8607                                                                                  |
| <i>R</i> <sub>int</sub>                                                                                   | na                                                                | na                                                                                    |
| Data / restraints / parameters                                                                            | 4451 / 0 / 208                                                    | 11761 / 0 / 702                                                                       |
| <i>S</i> <sup>[a]</sup>                                                                                   | 1.080                                                             | 1.037                                                                                 |
| <i>R</i> <sub>1</sub> <sup>[b]</sup> , <i>wR</i> <sub>2</sub> <sup>[c]</sup> ( <i>I</i> > 2σ( <i>I</i> )) | 0.0414, 0.1158                                                    | 0.0566, 0.1491                                                                        |
| <i>R</i> <sub>1</sub> <sup>[b]</sup> , <i>wR</i> <sub>2</sub> <sup>[c]</sup> (all data)                   | 0.0441, 0.1182                                                    | 0.0762, 0.1600                                                                        |
| <i>Δρ</i> <sub>min</sub> , <i>Δρ</i> <sub>max</sub> (eÅ <sup>-3</sup> )                                   | –0.218, 0.369                                                     | –0.198, 0.357                                                                         |

<sup>[a]</sup>  $S = [\Sigma(w(F_o^2 - F_c^2)^2) / (N_o - N_p)]^{1/2}$ .

<sup>[b]</sup>  $R_1 = \frac{\Sigma |F_o| - \Sigma |F_c|}{\Sigma |F_o|}$ .

<sup>[c]</sup>  $wR_2 = [\Sigma(w(F_o^2 - F_c^2)^2) / \Sigma(w(F_o^2)^2)]^{1/2}$ .

**Table S2.** Selected crystal data for [MeCAACH][F(HF)<sub>2</sub>] (**3**), [MeCAACH][F(HF)<sub>3</sub>] (**4**) and [MeCAACH][F(HF)<sub>3.5</sub>] (**5**).

|                                                                                                           | [MeCAACH][F(HF) <sub>2</sub> ]<br>( <b>3</b> )                   | [MeCAACH][F(HF) <sub>3</sub> ]<br>( <b>4</b> )                    | [MeCAACH][F(HF) <sub>3.5</sub> ]<br>( <b>5</b> )                  |
|-----------------------------------------------------------------------------------------------------------|------------------------------------------------------------------|-------------------------------------------------------------------|-------------------------------------------------------------------|
| CCDC No.                                                                                                  | 2263384                                                          | 2263388                                                           | 2263385                                                           |
| Chemical formula                                                                                          | C <sub>20</sub> H <sub>32</sub> N·H <sub>2</sub> F <sub>3</sub>  | C <sub>20</sub> H <sub>32</sub> N·H <sub>3</sub> F <sub>4</sub>   | 2C <sub>20</sub> H <sub>32</sub> N·H <sub>7</sub> F <sub>9</sub>  |
| <i>F<sub>w</sub></i> (g/mol)                                                                              | 345.48                                                           | 365.49                                                            | 750.98                                                            |
| <i>T</i> (K)                                                                                              | 150                                                              | 150                                                               | 150                                                               |
| $\lambda$ (Å)                                                                                             | 1.54184                                                          | 1.54184                                                           | 1.54184                                                           |
| Crystal size (mm)                                                                                         | 0.46 × 0.22 × 0.20                                               | 0.61 × 0.42 × 0.27                                                | 0.34 × 0.28 × 0.22                                                |
| Crystal system                                                                                            | Monoclinic                                                       | Monoclinic                                                        | Monoclinic                                                        |
| Space group                                                                                               | <i>P</i> 2 <sub>1</sub> / <i>n</i>                               | <i>P</i> 2 <sub>1</sub> / <i>c</i>                                | <i>P</i> 2 <sub>1</sub> / <i>n</i>                                |
| <i>a</i> (Å)                                                                                              | 10.8109(4)                                                       | 10.4339(3)                                                        | 10.9075(2)                                                        |
| <i>b</i> (Å)                                                                                              | 9.4778(3)                                                        | 14.8964(5)                                                        | 31.7144(5)                                                        |
| <i>c</i> (Å)                                                                                              | 20.4419(7)                                                       | 14.3883(5)                                                        | 12.9548(2)                                                        |
| $\alpha$ (°)                                                                                              | 90                                                               | 90                                                                | 90                                                                |
| $\beta$ (°)                                                                                               | 103.161(4)                                                       | 100.056(3)                                                        | 90.396(1)                                                         |
| $\gamma$ (°)                                                                                              | 90                                                               | 90                                                                | 90                                                                |
| <i>V</i> (Å <sup>3</sup> )                                                                                | 2039.53(12)                                                      | 2201.98(13)                                                       | 4481.3(1)                                                         |
| <i>Z</i>                                                                                                  | 4                                                                | 4                                                                 | 4                                                                 |
| $\rho_{calc}$ (g/cm <sup>3</sup> )                                                                        | 1.125                                                            | 1.102                                                             | 0.756                                                             |
| $\mu$ (mm <sup>-1</sup> )                                                                                 | 0.684                                                            | 0.724                                                             | 1.113                                                             |
| <i>F</i> (000)                                                                                            | 752                                                              | 792                                                               | 1624                                                              |
| $\theta$ range (°)                                                                                        | 4.2–71.8                                                         | 2.9–71.9                                                          | 3.6–72.2                                                          |
| Index ranges                                                                                              | –13 ≤ <i>h</i> ≤ 13<br>–9 ≤ <i>k</i> ≤ 11<br>–25 ≤ <i>l</i> ≤ 25 | –11 ≤ <i>h</i> ≤ 12<br>–18 ≤ <i>k</i> ≤ 17<br>–15 ≤ <i>l</i> ≤ 17 | –12 ≤ <i>h</i> ≤ 13<br>–39 ≤ <i>k</i> ≤ 38<br>–15 ≤ <i>l</i> ≤ 14 |
| Reflections collected                                                                                     | 16584                                                            | 16124                                                             | 38097                                                             |
| Independent reflections                                                                                   | 3973                                                             | 4295                                                              | 8757                                                              |
| Reflections with ( <i>I</i> > 2σ( <i>I</i> ))                                                             | 3211                                                             | 3212                                                              | 6680                                                              |
| <i>R</i> <sub>int</sub>                                                                                   | 0.0388                                                           | 0.0356                                                            | 0.0343                                                            |
| Data / restraints / parameters                                                                            | 3973 / 0 / 232                                                   | 4295 / 0 / 243                                                    | 8757 / 0 / 518                                                    |
| <i>S</i> <sup>[a]</sup>                                                                                   | 1.056                                                            | 1.044                                                             | 1.038                                                             |
| <i>R</i> <sub>1</sub> <sup>[b]</sup> , <i>wR</i> <sub>2</sub> <sup>[c]</sup> ( <i>I</i> > 2σ( <i>I</i> )) | 0.0498, 0.1289                                                   | 0.0502, 0.1323                                                    | 0.0607, 0.1666                                                    |
| <i>R</i> <sub>1</sub> <sup>[b]</sup> , <i>wR</i> <sub>2</sub> <sup>[c]</sup> (all data)                   | 0.0619, 0.1391                                                   | 0.0671, 0.1475                                                    | 0.0775, 0.1811                                                    |
| $\Delta\rho_{min}$ , $\Delta\rho_{max}$ (eÅ <sup>-3</sup> )                                               | –0.163, 0.469                                                    | –0.149, 0.313                                                     | –0.292, 0.414                                                     |

<sup>[a]</sup>  $S = [\Sigma(w(F_o^2 - F_c^2)^2)/(N_o - N_p)]^{1/2}$ .

<sup>[b]</sup>  $R_1 = \frac{\sum |F_o| - \sum |F_c|}{\sum |F_o|}$ .

<sup>[c]</sup>  $wR_2 = [\Sigma(w(F_o^2 - F_c^2)^2)/\Sigma(w(F_o^2)^2)]^{1/2}$ .

### S1.3.1 Crystal structures

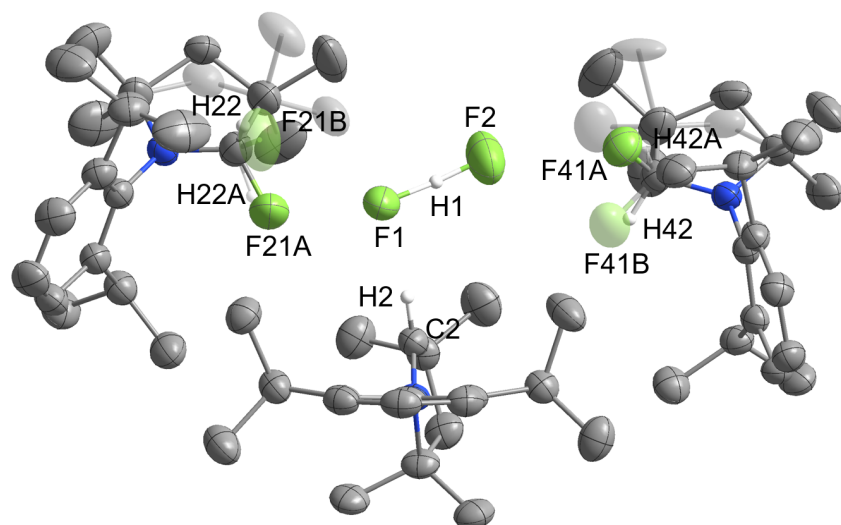

**Figure S20.** Crystal structure of [MeCAACH][F(HF)]·2MeCAAC(H)F (**2a**). The ellipsoids are drawn at 50% probability. The positions of disordered atoms are shown in domains A and B. For clarity, domain B is shaded and all hydrogen atoms are omitted except for the one at C2 position. Selected bond lengths (Å) and angles (°): F(1)⋯F(2) 2.235(2), F(1)⋯F(21A) 2.676(3), F(1)⋯F(21B) 2.672(8), F(2)⋯F(41A) 2.664(3), F(2)⋯F(41B) 2.820(5), C(2)–H(2) 0.950(2), N(1)–C(2) 1.275(3), N(1)–C(2)–H(2) 122.8(2).



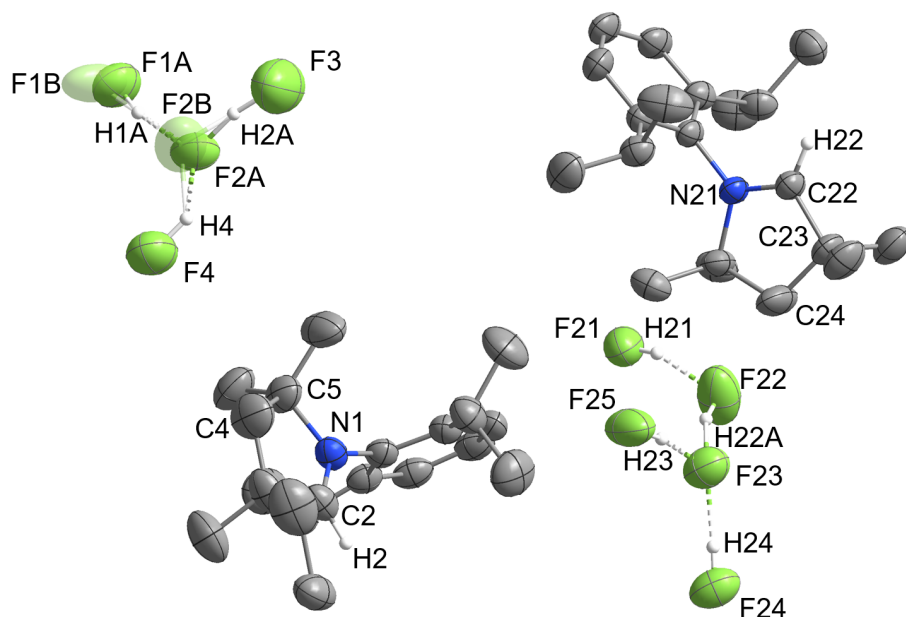

**Figure S21.** Crystal structure of  $[\text{MeCAACH}][\text{F}(\text{HF})_{3.5}]$  (**5**). The ellipsoids are drawn at 50% probability. The positions of disordered atoms are shown in domains A and B. For clarity, domain B is shaded and all hydrogen atoms are omitted except for the one at C2 position. Selected bond lengths (Å) and bond angles ( $^{\circ}$ ) for  $[\text{MeCAACH}][\text{H}_3\text{F}_4]$  ion pair: F(1A) $\cdots$ F(2A) 2.26(2), F(1B) $\cdots$ F(2B) 2.27(2), F(2A) $\cdots$ F(3) 2.27(1), F(2B) $\cdots$ F(3) 2.29(2), F(2A) $\cdots$ F(4) 2.38(1), F(2B) $\cdots$ F(4) 2.38(1), C(2)–H(2) 0.950(2), N(1)–C(2) 1.273(3), F(1A)–F(2A)–F(3) 108.9(5), F(1B)–F(2B)–F(3) 115.4(8), F(1A)–F(2A)–F(4) 114.4(5), F(1B)–F(2B)–F(4) 113.1(5), F(3)–F(2A)–F(4) 127.3(5), F(3)–F(2B)–F(4) 131.4(8), N(1)–C(2)–H(2) 122.7(2). Selected bond lengths (Å) and bond angles ( $^{\circ}$ ) for  $[\text{MeCAACH}][\text{H}_4\text{F}_5]$  ion pair: F(21) $\cdots$ F(22) 2.417(3), F(22) $\cdots$ F(23) 2.275(3), F(23) $\cdots$ F(24) 2.408(3), F(23) $\cdots$ F(25) 2.381(3), C(22)–H(22) 0.950(2), N(21)–C(22) 1.271(3), F(21)–F(22)–F(23) 121.8(1), F(22)–F(23)–F(24) 128.6(1), F(22)–F(23)–F(25) 112.8(1), N(21)–C(22)–H(22) 122.5(2).

## S2 Computational study

### S2.1 Fluoropyrrolidine 1A/dihydropyrrolium fluoride 1B system

The initial conformational search using the RI-DFT method and the double- $\zeta$  def2-SVP basis set in the simulated solvent (see Experimental for computational details) showed a strong energetical preference for **1A** over **1B** in agreement with the experimental data. The computational results are given in Table S3. Regarding the position of F<sup>-</sup> in **1B**, two orientations were found leading to the structures **1Ba** and **1Bb**. **1Ba** (Table S3, entry 2), in which the F<sup>-</sup> anion is coordinated to the dihydropyrrolium hydrogen, is preferred. In the second, less stable structure **1Bb** (Table S3, Entry 3), F<sup>-</sup> is localised below the dihydropyrrolium ring. The three selected structures are shown in Figure S22.

**Table S3.** Comparison of stability of fluoropyrrolidine **1A** and dihydropyrrolium fluorides **1B** using various computational approaches (Gibbs free energies given).

| Entry | Structure  | Method              | Rel. energy (kJ/mol) | Bond lengths (Å) |        |
|-------|------------|---------------------|----------------------|------------------|--------|
|       |            |                     |                      | C2-F             | H2...F |
| 1     | <b>1A</b>  | M06L/def2-SVP       | 0                    | 1.453            |        |
| 2     | <b>1Ba</b> | M06L/def2-SVP       | 68.8                 |                  | 1.487  |
| 3     | <b>1Bb</b> | M06L/def2-SVP       | 98.2                 |                  | 4.339  |
| 4     | <b>1A</b>  | M06L/def2-SVPD      | 0                    | 1.482            |        |
| 5     | <b>1Ba</b> | M06L/def2-SVPD      | 13.6                 |                  | 1.658  |
| 6     | <b>1Bb</b> | M06L/def2-SVPD      | 35.5                 |                  | 5.051  |
| 7     | <b>1A</b>  | M06-2X/def2-TZVP    | 0                    | 1.448            |        |
| 8     | <b>1Ba</b> | M06-2X/def2-TZVP    | 39.9                 |                  | 1.671  |
| 9     | <b>1Bb</b> | M06-2X/def2-TZVP    | 55.1                 |                  | 4.580  |
| 10    | <b>1A</b>  | ma-M06-2X/def2-TZVP | 0                    | 1.449            |        |
| 11    | <b>1Ba</b> | ma-M06-2X/def2-TZVP | 27.7                 |                  | 1.744  |
| 12    | <b>1Bb</b> | ma-M06-2X/def2-TZVP | 38.6                 |                  | 5.018  |
| 13    | <b>1A</b>  | M06-2X/def2-TZVPD   | 0                    | 1.449            |        |
| 14    | <b>1Ba</b> | M06-2X/def2-TZVPD   | 24.4                 |                  | 1.736  |
| 15    | <b>1Bb</b> | M06-2X/def2-TZVPD   | 39.2                 |                  | 5.009  |
| 16    | <b>1A</b>  | DSD-PBEP86/TZVP     |                      | 1.463            |        |
| 17    | <b>1A</b>  | DSD-PBEP86/TZVPP    |                      | 1.463            |        |
| 18    | <b>1A</b>  | <b>Exp</b>          |                      | <b>1.450(2)</b>  |        |

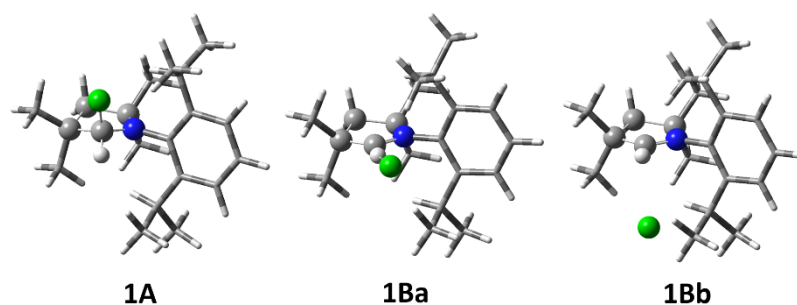

**Figure 22.** Selected computed structures of fluoropyrrolidine **1A** and dihydropyrrolium fluorides **1B**. For clarity, the substituents on the heterocyclic ring are drawn as tubes.

Considering that a correct description of anionic structures should include diffuse functions, we re-optimized all three structures using the same functional and the def2-SVPD basis set. Although the energetical difference between **1A** and **1B** decreased significantly, structure **1A** still remained the most stable, which is consistent with the experimental results. Aiming to obtain more quantitative results that could be more suitable for evaluating the  $\mathbf{1} + \mathbf{3} \rightarrow \mathbf{2} + \mathbf{2}$  isodesmic reaction, we further switched to the more precise hybrid functional M06-2X and the more accurate triple- $\zeta$  def2-TZVP basis set, optionally supplemented by either minimally augmented (ma-def2-TZVP) or fully augmented (def2-TZVPD) basis sets (Table S3, entries 7–15). Triple- $\zeta$  basis sets were recommended instead of using diffuse functions supplemented by double- $\zeta$  basis sets, and the use of diffuse functions for larger sets was said to be unnecessary.<sup>1</sup> The energetical differences between **1A** and **1B** obtained using the def2-TZVPP basis set and more accurate functions were approximately between the results with double- $\zeta$  basis sets (Table S3, entries 7–9). The addition of diffuse functions reduced this difference somewhat, less for minimally augmented (Table S3, entries 10–12) and more for fully augmented (Table S3, entries 13–15) basis sets. The C2–F bond became longer when diffuse functions were added to the double- $\zeta$  basis set (from 1.453 Å to 1.482 Å), but surprisingly became shorter and almost constant (from 1.448 Å to 1.449 Å) for all triple- $\zeta$  calculations. On the other hand, the distance between H2 of the dihydropyrrolium salt and the coordinated F<sup>-</sup> anion gradually increased from 1.487 Å to 1.744 Å as the quality of the calculations increased. Finally, to obtain even better energetics for the global minimum **1A**, we optimised it with the recently recommended Martin’s „DSD“-double scale hybrid functional,<sup>2</sup> which combines the DFT method with spin-component-scaled MP2 mixing and TZVP or TZVPP basis sets (Table S3, entries 16 and 17). Both calculations resulted in a C–F distance of 1.463 Å, which is slightly longer than the crystal bond length of 1.450 Å (Table S3, entry 18).

### **S2.2 Fluoropyrrolidine·HF 2A/dihydropyrrolium hydrogen difluoride 2B system**

Initial tentative calculations were again performed using a pure functional and a simple def2-SVP basis set. Seven significant geometries were found in the conformational space. The 3 selected structures are shown in Figure S23. The computational data are given in Table S4. Surprisingly, the most stable structure turned out to be a fluoropyrrolidine with HF coordinated to the fluorine assigned to **2A** (Table S4, entry 1). In fact, two stable conformers with different orientations were found, of which only the more stable one is shown.

**Table S4.** Comparison of stability of fluoropyrrolidine·HF **2A** and dihydropyrrolium hydrogen difluorides **2B** using various computational approaches (Gibbs free energies given).

| Entry | Structure   | Method              | Rel. energy (kJ/mol) | Bond lengths (Å) |                 |                        |                 |
|-------|-------------|---------------------|----------------------|------------------|-----------------|------------------------|-----------------|
|       |             |                     |                      | C2-F             | H2...F          | F-(HF)                 | F...F           |
| 1     | <b>2A</b>   | M06L/def2-SVP       | 0                    | 1.571            |                 | 0.952/1.569            | 2.521           |
| 2     | <b>2Ba</b>  | M06L/def2-SVP       | 3.6                  |                  | 1.772           | 1.032/1.288            | 2.318           |
| 3     | <b>2Bb</b>  | M06L/def2-SVP       | 13.1                 |                  | 4.607           | 1.067/1.232            | 2.300           |
| 4     | <b>2A</b>   | M06L/def2-SVPD      | NA                   |                  |                 |                        |                 |
| 5     | <b>2Ba</b>  | M06L/def2-SVPD      | 1.5                  |                  | 1.888           | 1.040/1.281            | 2.321           |
| 6     | <b>2Bb</b>  | M06L/def2-SVPD      | 0                    |                  | 4.493           | 1.135/1.150            | 2.285           |
| 7     | <b>2A</b>   | M06-2X/def2-TZVP    | 39.9                 | 1.532            |                 | 0.951/1.563            | 2.514           |
| 8     | <b>2Ba</b>  | M06-2X/def2-TZVP    | 0                    |                  | 2.127           | 1.116/1.148            | 2.264           |
| 9     | <b>2Bb</b>  | M06-2X/def2-TZVP    | 9.8                  |                  | 4.810           | 1.123/1.144            | 2.269           |
| 10    | <b>2A</b>   | ma-M06-2X/def2-TZVP | 48.5                 | 1.539            |                 | 0.952/1.555            | 2.507           |
| 11    | <b>2Ba'</b> | ma-M06-2X/def2-TZVP | 0                    |                  | 1.960           | 1.105/1.162            | 2.267           |
| 12    | <b>2Bb</b>  | ma-M06-2X/def2-TZVP | 10.6                 |                  | 4.849           | 1.128/1.138            | 2.267           |
| 13    | <b>2A</b>   | M06-2X/def2-TZVPD   | 47.0                 | 1.537            |                 | 0.953/1.552            | 2.504           |
| 14    | <b>2Ba'</b> | M06-2X/def2-TZVPD   | 0                    |                  | 1.953           | 1.106/1.162            | 2.270           |
| 15    | <b>2Bb</b>  | M06-2X/def2-TZVPD   | 9.8                  |                  | 4.858           | 1.101/1.139            | 2.268           |
| 16    | <b>2Ba</b>  | DSD-PBEP86/TZVP     |                      |                  | 1.918           | 1.094/1.176            | 2.270           |
| 17    | <b>2Ba</b>  | DSD-PBEP86/TZVPP    |                      |                  | 4.858           | 1.082/1.190            | 2.272           |
| 18    | <b>2Ba</b>  | <b>Exp</b>          |                      |                  | <b>2.043(2)</b> | <b>1.19(3)/1.06(3)</b> | <b>2.235(2)</b> |

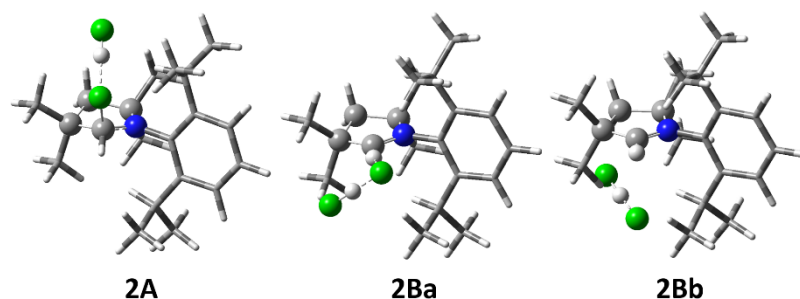

**Figure 23.** Selected computed structures of fluoropyrrolidine **2A** and dihydropyrrolium dihydrogen difluorides **2B** at the ma-M06L/def2-TZVP level. For clarity, the substituents on the heterocyclic ring are drawn as tubes.

Almost identical stability was shown by the ionic structure with the  $[\text{F}(\text{HF})]^-$  anion coordinated to the dihydropyrrolium C2–H hydrogen (**2Ba**, Table S4, entry 2). Other structures with the  $[\text{F}(\text{HF})]^-$  anion oriented below or above the dihydropyrrolium ring were more than 20 kJ/mol less stable. Structure **2Bb** (Table S4, entry 3) is shown as a typical example. After adding diffusion functions to the def2-SVP basis set, the results of optimisations changed significantly. Structure **2A** was no longer a minimum on the PES of the system and only **2B** structures in different conformations were found to be stable structures. Among the six calculated structures with quite similar Gibbs free energy, structure **2Ba** (Table S4, entry 5) and structure **2Bb** (Table S4, entry 6) were the most stable due to coordination energy and favourable entropy, respectively. Computations at the higher level as before (M06-2X/def2-TZVP) again revealed **2A** as a stable structure (Table S4, entry 7), but with a much higher energy (almost 40 kJ/mol) than the salts **2B**, which is in contrast to the double- $\zeta$  basis set calculation. Structure **2Ba** (Table S4, entry 8) was found to be almost 10 kJ/mol more stable than structure **2Bb** (Table S4, entry 9) and other similar structures where the anion is coordinated below or above the heterocyclic ring. The use of a minimally (ma-def2-TZVP) or fully (def2-TZVPD) augmented triple- $\zeta$  basis set by diffuse functions gave analogous results, further increasing the difference between structures **2A** and **2B** (Table S4, entries 10–15). For the last two basis sets, the **2Ba'** structure with different orientation of the  $[\text{F}(\text{HF})]^-$  anion became the most stable structure (Figure S24).

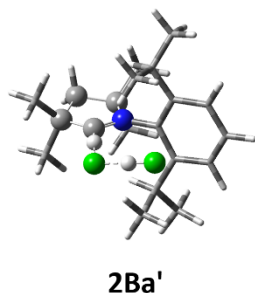

**Figure 24.** Preferred orientation of the  $[\text{F}(\text{HF})]^-$  anion in the **2Ba'** structure computed at the triple- $\zeta$  basis set level. For clarity, the substituents on the heterocyclic ring are drawn as tubes.

In computations, compound **2** appears to be the most sensitive to the quality of the calculations, with the simple double- $\zeta$  basis set underestimating the stability of the  $[\text{F}(\text{HF})]^-$  anion and the double- $\zeta$  basis set including diffuse functions overestimating it. Again, all triple- $\zeta$  basis sets gave analogous results. The higher stability of the  $[\text{F}(\text{HF})]^-$  anion, observed in the higher quality calculations, is reflected in the fact that the C2–H $\cdots$  $[\text{F}(\text{HF})]^-$  distance increases from 1.772 Å to 1.918 Å. The  $[\text{F}(\text{HF})]^-$  anion becomes increasingly symmetrical as more diffuse functions are added. On the other hand, the  $[\text{F}(\text{HF})]^-$  anion becomes slightly dissymmetric when calculated at the DSD level. The computed orientation of the  $[\text{F}(\text{HF})]^-$  anion agrees well with that observed in the crystal structure. The computed structure of the  $[\text{F}(\text{HF})]^-$  anion is quite close to that of the crystal, with F $\cdots$ F distance decreasing from 2.321 Å for the simple SVPD basis set to 2.264 Å for the TZVP basis set. The best DSD calculation including the TZVPP basis set gave a length of 2.272 Å, which is slightly larger than the crystal value of 2.235(**2**) Å, probably due to the inclusion of the implicit solvent in the calculation. As for the geometry of the  $[\text{F}(\text{HF})]^-$  anion, the computations gave a linear structure in contrast to the slightly bent structure in the crystal (168°), which is probably caused by the intermolecular interactions in the crystal.

### S2.3 Fluoropyrrolidine-2HF 3A/dihydropyrrolium dihydrogen trifluoride 3B system

No **3A** structures were found on the PES of the system, even with the simple double- $\zeta$  basis set. Among the multiple minima found, the structures **3Ba**, **3Bb** and **3Bc** showed the lowest energy, which in all cases involved different coordinations of the  $[\text{F}(\text{HF})_2]^-$  anion to the C2–H hydrogen (see Figure S25 and Table S5).

**Table S5.** Relative stability and structural parameters of dihydropyrrolium dihydrogen trifluorides **3B** using various computational approaches (Gibbs free energies given).

| Entry | Structure   | Method              | Rel. energy (kJ/mol) | Angles (°)                                         | Bond lengths (Å)                 |                                  |                                 |
|-------|-------------|---------------------|----------------------|----------------------------------------------------|----------------------------------|----------------------------------|---------------------------------|
|       |             |                     |                      | F <sup>1</sup> ...F <sup>2</sup> ...F <sup>3</sup> | F <sup>1</sup> ...F <sup>2</sup> | F <sup>2</sup> ...F <sup>3</sup> | H2...F <sup>[a]</sup>           |
| 1     | <b>3Ba</b>  | M06L/def2-SVP       | 0                    | 155                                                | 2.375                            | 2.383                            | 2.169 (F <sup>1</sup> )         |
| 2     | <b>3Bb</b>  | M06L/def2-SVP       | 0.4                  | 95                                                 | 2.384                            | 2.367                            | 2.137 (F <sup>2</sup> )         |
| 3     | <b>3Bc</b>  | M06L/def2-SVP       | 2.5                  | 120                                                | 2.353                            | 2.356                            | 2.225 (F <sup>1</sup> )         |
| 4     | <b>3Ba</b>  | M06L/def2-SVPD      | 3.3                  | 122                                                | 2.379                            | 2.379                            | 2.433 (F <sup>1</sup> )         |
| 5     | <b>3Bc</b>  | M06L/def2-SVPD      | 0                    | 122                                                | 2.397                            | 2.389                            | 2.006 (F <sup>2</sup> )         |
| 6     | <b>3Bc'</b> | M06L/def2-SVPD      | 4.4                  | 111                                                | 2.391                            | 2.394                            | 2.066 (F <sup>2</sup> )         |
| 7     | <b>3Ba</b>  | M06-2X/def2-TZVP    | 7.2                  | 121                                                | 2.319                            | 2.318                            | 2.370 (F <sup>1</sup> )         |
| 8     | <b>3Bc</b>  | M06-2X/def2-TZVP    | 0                    | 131                                                | 2.330                            | 2.331                            | 2.051 (F <sup>2</sup> )         |
| 9     | <b>3Bc'</b> | M06-2X/def2-TZVP    | 10.9                 | 112                                                | 2.329                            | 2.331                            | 2.133 (F <sup>2</sup> )         |
| 10    | <b>3Ba</b>  | ma-M06-2X/def2-TZVP | 7.5                  | 122                                                | 2.320                            | 2.319                            | 2.409 (F <sup>1</sup> )         |
| 11    | <b>3Bc</b>  | ma-M06-2X/def2-TZVP | 0                    | 131                                                | 2.330                            | 2.331                            | 2.051 (F <sup>2</sup> )         |
| 12    | <b>3Bc'</b> | ma-M06-2X/def2-TZVP | 6.7                  | 115                                                | 2.330                            | 2.330                            | 2.103 (F <sup>2</sup> )         |
| 13    | <b>3Ba</b>  | M06-2X/def2-TZVPD   | 6.9                  | 121                                                | 2.321                            | 2.318                            | 2.409 (F <sup>1</sup> )         |
| 14    | <b>3Bb</b>  | M06-2X/def2-TZVPD   | 8.2                  | 141                                                | 2.314                            | 2.331                            | 2.220 (F <sup>2</sup> )         |
| 15    | <b>3Bc</b>  | M06-2X/def2-TZVPD   | 0                    | 115                                                | 2.330                            | 2.329                            | 2.056 (F <sup>2</sup> )         |
| 16    | <b>3Bc</b>  | DSD-PBEP86/TZVP     |                      | 125                                                | 2.354                            | 2.355                            | 2.017 (F <sup>2</sup> )         |
| 17    | <b>3Bc</b>  | DSD-PBEP86/TZVPP    |                      | 124                                                | 2.351                            | 2.353                            | 2.000 (F <sup>2</sup> )         |
| 18    | <b>3Bc'</b> | <b>Exp</b>          |                      | <b>108.54(8)</b>                                   | <b>2.263(2)</b>                  | <b>2.320(2)</b>                  | <b>2.343(2) (F<sup>1</sup>)</b> |

<sup>[a]</sup> distance to the closest F atom

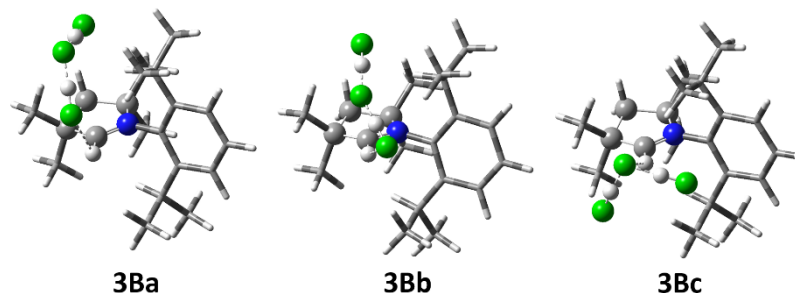

**Figure 25.** Selected computed structures of dihydropyrrolium dihydrogen trifluorides **3B** at the M06L/def2-SVP level. For clarity, the substituents on the heterocyclic ring are drawn as tubes.

The  $[\text{F}(\text{HF})_2]^-$  anion corresponds in all cases to an  $\text{F}^-$  anion coordinated to two HF molecules. The angle varies greatly between  $90^\circ$  and  $160^\circ$  for different structures. Analogous structures were obtained with previously used computational methods (M05L/def2-SVPD, M06-2X/def2-TZVP, M06-2X/ma-def2-TZVP, M06-2X/def2-TZVPD) with different geometries, and the results are listed in the Supporting Information, Table S5. The three main geometries are listed, with the most stable structure at higher levels being **3Bc**, where the  $[\text{F}(\text{HF})_2]^-$  anion is coordinated to the C2–H hydrogen by the central F atom. This agrees well with the coordination of the  $[\text{F}(\text{HF})_2]^-$  anion in the crystal structure. The slightly different orientation is probably due to the crystal packing. The observed  $\text{F}\cdots\text{F}\cdots\text{F}$  angle of  $109^\circ$  is not far from the calculated value of  $124^\circ$  for the best calculation used. The  $\text{F}\cdots\text{F}$  lengths are about 5% longer than the observed crystal values, again probably as a result of tighter crystal packing compared to the isolated calculated structure in the simulated solvent (Table S5, entries 17 and 18).

#### S2.4 Isodesmic reaction $1 + 3 \rightarrow 2 + 2$

According to the experimental data, we were able to synthesise and isolate the crystal structures of both the fluoropyrrolidine  $\text{Me}^c\text{CAAC}(\text{H})\text{F}$  (**1**) and the dihydropyrrolium salt  $[\text{Me}^c\text{CAACH}][\text{F}(\text{HF})_2]$  (**3**), however, the salt  $[\text{Me}^c\text{CAACH}][\text{F}(\text{HF})]$  (**2**) proved to be unstable and disproportionate to **1** and **3**. As mentioned earlier, this was the trigger for us to start the computational study and find all the critical structures. Assuming that the disproportionation was indeed caused by the lower thermodynamic stability of **2**, the isodesmic reaction  $1 + 3 \rightarrow 2 + 2$  should be endergonic (Scheme S1).

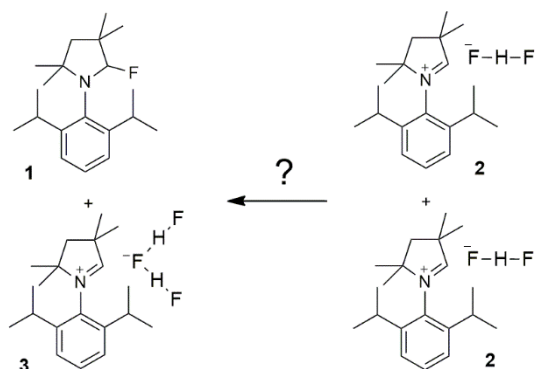

**Scheme 1.** Isodesmic reaction of  $\text{Me}^c\text{CAAC}(\text{H})\text{F}$  (**1**) +  $[\text{Me}^c\text{CAACH}][\text{H}_2\text{F}_3]$  (**3**)  $\rightarrow$   $[\text{Me}^c\text{CAACH}][\text{HF}_2]$  (**2**) +  $[\text{Me}^c\text{CAACH}][\text{HF}_2]$  (**2**).

Indeed, the sum of the energies of **1** + **3** calculated with the preliminary double- $\zeta$  basis set was 26.4 kJ/mol lower than the sum of the energies **2** + **2** (Table S6, entry 1). However, extending the basis set with diffuse functions gave opposite results and showed that the reaction in Scheme 4 is exergonic with  $\Delta G = -13.9$  kJ/mol (Table S6, entry 2). We then tried to improve the quality of our calculations by using a triple- $\zeta$  basis set with optional minimal or full augmentation with diffuse functions. The isodesmic reaction was still exergonic even at this level, with the exergonicity increasing with the addition of diffuse functions (Table S6, entries 3–5). Finally, we decided to use the calculation recently recommended spin-component scaled double hybrid functionals blending DFT and perturbation theory, and performed optimisations using the DSD-PBEP86 functional<sup>2</sup> with the triple- $\zeta$  def2-TZVP basis set (Table S6, entry 6) or the def2-TZVPP basis with additional polarisation functions (Table S6, entry 7). The energy difference finally obtained,  $\Delta G = -12.5$  kJ/mol, is probably the best estimate of the isodesmic equilibrium between the isolated structures **1**, **2** and **3**. The discrepancy between the observed and the calculated results is unclear to us, is probably related to the crystal packing and will be further studied.

**Table S6.** Results of the isodesmic reaction  $\text{MeCAAC(H)F (1)} + [\text{MeCAACH}][\text{H}_2\text{F}_3] (\mathbf{3}) \rightarrow [\text{MeCAACH}][\text{HF}_2] (\mathbf{2}) + [\text{MeCAACH}][\text{HF}_2] (\mathbf{2})$  at various levels of theory.

| Entry | Method               | $\Delta G$ (kJ/mol) |
|-------|----------------------|---------------------|
| 1     | M06L/def2-SVP        | 26.4                |
| 2     | M06L/def2-SVPD       | -13.9               |
| 3     | M06-2X/def2-TZVP     | -10.2               |
| 4     | M06-2X/ma-def2-TZVP  | -22.4               |
| 5     | M06-2X/def2-TZVPD    | -22.3               |
| 6     | DSDPBEP86/def2-TZVP  | -18.4               |
| 7     | DSDPBEP86/def2-TZVPP | -12.5               |



### S3 Reactivity analysis

**Table S7.** Model reaction for fluorination of benzyl bromide **4a**. Additional data.

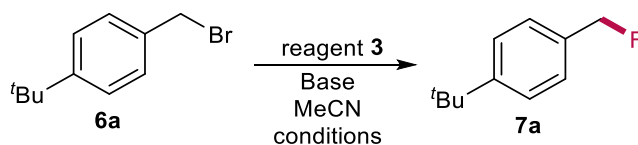

| Entry | Reagent <b>3</b> [eq.] | Base (eq.)                          | <b>6a</b> | Conversion <sup>[a]</sup> | Yield of <b>7a</b> <sup>[a]</sup> |
|-------|------------------------|-------------------------------------|-----------|---------------------------|-----------------------------------|
| 1     | 0.7                    | DIPEA 1.8                           | 0         | 100                       | 65                                |
| 2     | 1.1                    | DIPEA 1.8                           | 0         | 100                       | 60                                |
| 3     | 0                      | DIPEA 4                             | 34        | 56                        | 0                                 |
| 4     | 0.7                    | DIPEA 0.5                           | 32        | 70                        | 60                                |
| 5     | 1                      | DBU 2                               | 0         | 100                       | 22                                |
| 6     | 1                      | di- <i>t</i> BuPy <sup>[b]</sup> 1  | 49        | 51                        | 49                                |
| 7     | 1                      | NaHCO <sub>3</sub> 1                | 30        | 72                        | 64                                |
| 8     | 1                      | NaHCO <sub>3</sub> 2                | 34        | 70                        | 59                                |
| 9     | 1                      | NaHCO <sub>3</sub> 4                | 92        | 8                         | 6                                 |
| 10    | 1                      | K <sub>2</sub> CO <sub>3</sub> 1    | 14        | 86                        | 78                                |
| 11    | 1                      | Na <sub>2</sub> CO <sub>3</sub> 1   | 20        | 80                        | 74                                |
| 12    | 1                      | Cs <sub>2</sub> CO <sub>3</sub> 1.2 | 0         | 100                       | 98                                |
| 13    | 1                      | Cs <sub>2</sub> CO <sub>3</sub> 0.5 | 0         | 100                       | 99                                |

<sup>[a]</sup> Conversions and yields were determined with qNMR with naphthalene as an internal standard.

<sup>[b]</sup> 2,6-di-*tert*-butylpyridine.

**Table S8.** Conversion of **6a** to **7a** depending on the amount of reagent **3** used.

| Entry | Reagent <b>3</b> [eq.] | <b>6a</b> | <b>7a</b> | Conversion <sup>[a]</sup> | Yield of <b>7a</b> <sup>[a]</sup> |
|-------|------------------------|-----------|-----------|---------------------------|-----------------------------------|
| 9     | 0.9                    | 0         | 100       | 100                       | 99                                |
| 10    | 0.8                    | 0         | 100       | 100                       | 99                                |
| 11    | 0.7                    | 0         | 100       | 100                       | 99                                |
| 12    | 0.6                    | 7         | 93        | 94                        | 91                                |
| 13    | 0.5                    | 10        | 89        | 11                        | 83                                |
| 24    | 0.4                    | 15        | 83        | 17                        | 75                                |

<sup>[a]</sup> Conversions and yields were determined with qNMR with naphthalene as an internal standard.

**Table S9.** Fluorination of primary bromide **8**.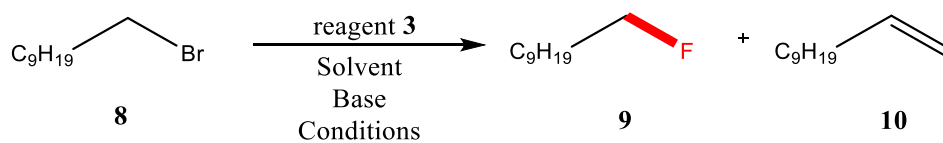

| Entry | Reagent <b>3</b><br>[eq.] | Base<br>(eq)                           | Solvent | Conditions | t [h] | <b>8</b> | <b>9</b> | <b>10</b> | Conversion <sup>[a]</sup> | NMR<br>yield <sup>[a]</sup> |
|-------|---------------------------|----------------------------------------|---------|------------|-------|----------|----------|-----------|---------------------------|-----------------------------|
| 1     | 0.7                       | Cs <sub>2</sub> CO <sub>3</sub><br>0.5 | MeCN    | 140 °C     | 1     | 78       | 22       | 0         | 22                        | 22                          |
| 2     | 0.7                       | Cs <sub>2</sub> CO <sub>3</sub><br>0.5 | MeCN    | 140 °C     | 5     | 40       | 60       | 0         | 60                        | 60                          |
| 3     | 0.7                       | Cs <sub>2</sub> CO <sub>3</sub><br>0.5 | DMSO    | 140 °C     | 5     | 0        | 76       | 24        | 100                       | 60                          |
| 4     | 0.7                       | Cs <sub>2</sub> CO <sub>3</sub><br>0.5 | DMF     | 140 °C     | 5     | 0        | 100      | 0         | 100                       | 35                          |
| 5     | 0.7                       | Cs <sub>2</sub> CO <sub>3</sub><br>0.5 | MeCN    | 140 °C     | 21    | 11       | 83       | 6         | 89                        | 83                          |
| 6     | 0.7                       | Cs <sub>2</sub> CO <sub>3</sub><br>0.5 | MeCN    | 140 °C     | 30    | 7        | 91       | 2         | 93                        | 91                          |
| 7     | 0.7                       | Cs <sub>2</sub> CO <sub>3</sub><br>0.5 | acetone | 140 °C     | 1     | 99       | 1        | 0         | 99                        | 1                           |

<sup>[a]</sup> Conversions and yields were determined with qNMR with naphthalene as an internal standard.

**Table S10.** Optimization of reaction conditions for fluorination of secondary mesylate **11**.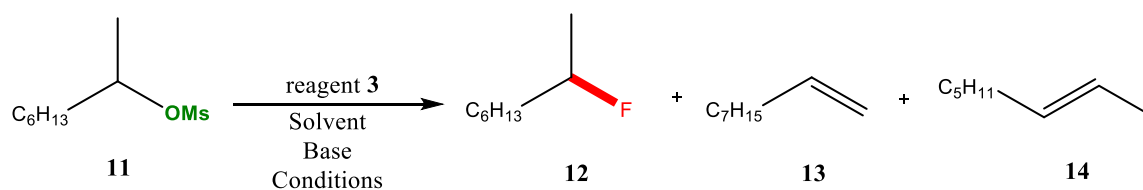

| Entry | Reagent <b>3</b> (eq.) | Base (eq)                           | Solvent           | Conditions | t [h] | <b>11</b> | <b>12</b> | <b>13</b> | <b>14</b> | Conversion <sup>[a]</sup> | NMR yield <sup>[a]</sup> |
|-------|------------------------|-------------------------------------|-------------------|------------|-------|-----------|-----------|-----------|-----------|---------------------------|--------------------------|
| 1     | 1                      | Cs <sub>2</sub> CO <sub>3</sub> 1   | MeCN              | 140 °C     | 2     | 31        | 20        | 15        | 34        | 69                        | 22                       |
| 2     | 1                      | Cs <sub>2</sub> CO <sub>3</sub> 1   | MeCN              | 140 °C     | 5     | 23        | 20        | 19        | 38        | 77                        | 22                       |
| 3     | 1                      | Cs <sub>2</sub> CO <sub>3</sub> 1   | MeCN              | 140 °C     | 6     | 33        | 11        | 9         | 47        | 67                        | 30                       |
| 4     | 1                      | Cs <sub>2</sub> CO <sub>3</sub> 1   | <sup>t</sup> BuOH | 140 °C     | 2     | 0         | 30        | 8         | 46        | 100                       | 50                       |
| 5     | 1                      | Cs <sub>2</sub> CO <sub>3</sub> 1   | <sup>t</sup> BuOH | 140 °C     | 6     | 0         | 31        | 11        | 31        | 100                       | 30                       |
| 6     | 1                      | Cs <sub>2</sub> CO <sub>3</sub> 1   | <sup>t</sup> BuOH | 130 °C     | 24    | 0         | 23        | 6         | 30        | 100                       | 18                       |
| 7     | 1.5                    | Cs <sub>2</sub> CO <sub>3</sub> 1.5 | <sup>t</sup> BuOH | 140 °C     | 3     | 0         | 47        | 11        | 24        | 100                       | 42                       |
| 8     | 1.1                    | Cs <sub>2</sub> CO <sub>3</sub> 1.5 | <sup>t</sup> BuOH | 140 °C     | 3     | 0         | 56        | 6         | 19        | 100                       | 58                       |

<sup>[a]</sup> Conversions and yields were determined with qNMR with naphthalene as an internal standard.

**Table S11.** Characterisation of products obtained by the fluorination of substituted benzyl bromides (additional information to **Table 6**).

| <b>6</b>  | <b>Substituent</b>  | $\delta$ <sup>1</sup> H (ppm)                                                                                                             | $\delta$ <sup>19</sup> F (ppm)                           | <b>Ref.</b> |
|-----------|---------------------|-------------------------------------------------------------------------------------------------------------------------------------------|----------------------------------------------------------|-------------|
| <b>6a</b> | 4- <sup>t</sup> Bu  | 7.43 (d, <i>J</i> = 7.9 Hz, 2H), 7.34–7.31 (m, 2H), 5.35 (d, <i>J</i> = 48.1 Hz, 2H), 1.33 (s, 10H)                                       | –204.24 (t, <i>J</i> = 48.2 Hz)                          | 3           |
| <b>6b</b> | 4-NO <sub>2</sub>   | 8.25 (d, <i>J</i> = 8.4 Hz, 2H), 7.33 (d, <i>J</i> = 7.8 Hz, 2H), 5.49 (d, <i>J</i> = 46.8 Hz, 2H)                                        | –215.68 (t, <i>J</i> = 46.9 Hz)                          | 3           |
| <b>6c</b> | 3-OMe               | 6.98–6.88 (m, 1H), 5.36 (d, <i>J</i> = 47.7 Hz, 1H), 3.83 (s, 1H)                                                                         | –207.77 (t, <i>J</i> = 47.7 Hz)                          | 3           |
| <b>6d</b> | 3-Br                | 7.36 (d, <i>J</i> = 7.9 Hz, 2H), 7.28 (d, <i>J</i> = 7.8 Hz, 1H), 5.36 (d, <i>J</i> = 47.4 Hz, 2H)                                        | –209.71 (t, <i>J</i> = 47.5 Hz)                          | 4           |
| <b>6e</b> | 4-Br                | 7.47 (dd, <i>J</i> = 7.7, 3.8 Hz, 1H), 7.31 (d, <i>J</i> = 7.8 Hz, 1H), 5.28 (d, <i>J</i> = 47.6 Hz, 1H)                                  | –208.01 (t, <i>J</i> = 47.7 Hz)                          | 5           |
| <b>6f</b> | 3,5-CF <sub>3</sub> | 7.88 (s, 1H), 7.84 (s, 2H), 5.53 (d, <i>J</i> = 46.8 Hz, 2H)                                                                              | –62.97, –214.29 (t, <i>J</i> = 46.8 Hz)                  | 6           |
| <b>6g</b> | 3-Cl                | 7.35 (s, 1H), 7.32 (d, <i>J</i> = 5.2 Hz, 2H), 7.24 (d, <i>J</i> = 4.4 Hz, 1H), 5.35 (d, <i>J</i> = 47.5 Hz, 2H)                          | –209.78 (t, <i>J</i> = 47.6 Hz)                          | 7           |
| <b>6h</b> | 4-Me                | 7.28 (dd, <i>J</i> = 8.1, 2.1 Hz, 2H), 7.21 (d, <i>J</i> = 7.7 Hz, 2H), 5.33 (d, <i>J</i> = 48.2 Hz, 2H), 2.37 (d, <i>J</i> = 2.4 Hz, 3H) | –206.35 (t, <i>J</i> = 47.6 Hz)                          | 8           |
| <b>6i</b> | H                   | 7.41–7.38 (m, 3H), 7.36 (d, <i>J</i> = 7.8 Hz, 2H), 5.39 (d, <i>J</i> = 47.9 Hz, 2H)                                                      | –206.54 (t, <i>J</i> = 47.8 Hz)                          | 3           |
| <b>6j</b> | 4-F                 | 7.36 (d, <i>J</i> = 7.8 Hz, 2H), 7.11–7.06 (m, 2H), 5.34 (d, <i>J</i> = 48.0 Hz, 2H)                                                      | (–112.85)–(–112.93) (m), –203.87 (t, <i>J</i> = 48.3 Hz) | NA          |
| <b>6k</b> | 2-Ph                | 7.56 (t, <i>J</i> = 5.7 Hz, 1H), 7.46–7.34 (m, 8H), 5.29 (d, <i>J</i> = 48.1 Hz, 2H)                                                      | –199.62 (t, <i>J</i> = 48.0 Hz)                          | 9           |

**Table S12.** Characterisation of products obtained by the fluorination of alkyl bromides, alkyl mesylates and other substrates.

| <b>Product</b>                             | <b><math>\delta</math> <sup>19</sup>F (ppm)</b> | <b>Ref.</b> |
|--------------------------------------------|-------------------------------------------------|-------------|
| 4-Nitrofluorobenzene                       | (-102.30)–(-102.36) (m)                         | 10          |
| 4-Nitrobenzoyl fluoride                    | 21.23 (s)                                       | 11          |
| <i>t</i> -Bu(fluoro)dimethyl silane        | (-170.99)–(-171.08) (m)                         | 12          |
| 4-Nitrobenzenesulfonyl fluoride            | 66.00 (s)                                       | 13          |
| Phenacyl fluoride                          | (-199.07)–(-199.26) (m)                         | 14          |
| 1,5-Difluoropentane                        | -218.65 (m)                                     | NA          |
| 1-Fluorodecane ( <b>9</b> ) <sup>[a]</sup> | -217.94 (m)                                     | 15          |
| 2-Fluorooctane ( <b>12</b> )               | (-171.81)–(-172.13) (m)                         | 15          |

<sup>[a]</sup> <sup>1</sup>H NMR  $\delta$  (ppm): 4.43 (dt,  $J$  = 47.4, 6.2 Hz, 2H), 1.71–1.65 (m, 2H), 1.28–1.25 (m, 10H), 0.88 (t,  $J$  = 6.9 Hz, 3H).

## S4 List of computed structures (energies in kJ/mol)

### Method M06L/def2-SVP

1A:  $\Delta G = -2454347.8$  kJ/mol

|   |          |          |          |
|---|----------|----------|----------|
| C | 1.11616  | 0.49328  | 1.46002  |
| C | 2.46730  | 1.08094  | 1.01893  |
| C | 2.71719  | 0.63240  | -0.43053 |
| N | 0.47886  | 0.21547  | 0.13856  |
| H | 2.40800  | 2.18059  | 1.04538  |
| H | 3.28435  | 0.78854  | 1.69571  |
| C | 0.32380  | 1.49312  | 2.29431  |
| H | -0.68397 | 1.11405  | 2.52372  |
| H | 0.83101  | 1.66370  | 3.25536  |
| H | 0.22472  | 2.46705  | 1.79708  |
| C | 1.25963  | -0.78474 | 2.28563  |
| H | 1.65969  | -0.54821 | 3.28228  |
| H | 0.28068  | -1.26601 | 2.43487  |
| H | 1.93417  | -1.52081 | 1.82980  |
| C | 3.55398  | 1.64099  | -1.20406 |
| H | 4.57056  | 1.69003  | -0.78600 |
| H | 3.64858  | 1.35739  | -2.26324 |
| H | 3.12566  | 2.65041  | -1.16416 |
| C | 3.40118  | -0.73071 | -0.51063 |
| H | 3.50797  | -1.05826 | -1.55624 |
| H | 4.41014  | -0.67858 | -0.07587 |
| H | 2.85837  | -1.51971 | 0.02514  |
| C | -0.85040 | -0.28797 | -0.00508 |
| C | -1.06424 | -1.68753 | -0.10693 |
| C | -1.95651 | 0.59840  | -0.06801 |
| C | -2.37395 | -2.17280 | -0.20363 |
| C | -3.24882 | 0.06313  | -0.15701 |
| C | -3.46400 | -1.30923 | -0.21058 |
| H | -2.53784 | -3.25153 | -0.28517 |
| H | -4.10373 | 0.74444  | -0.20405 |
| H | -4.48072 | -1.70517 | -0.27937 |
| C | -1.80554 | 2.10511  | -0.13612 |
| H | -0.74416 | 2.33639  | 0.01729  |
| C | 0.07934  | -2.67546 | -0.19869 |
| H | 0.99820  | -2.12806 | 0.04398  |
| C | -2.62297 | 2.83372  | 0.92308  |
| H | -2.40083 | 2.48145  | 1.94059  |
| H | -2.41853 | 3.91474  | 0.89610  |
| H | -3.70546 | 2.71070  | 0.76247  |
| C | -2.17391 | 2.60607  | -1.53037 |
| H | -1.58137 | 2.10951  | -2.31116 |
| H | -3.23829 | 2.43096  | -1.75468 |
| H | -1.99619 | 3.68897  | -1.61776 |
| C | -0.04984 | -3.83150 | 0.78390  |
| H | 0.84506  | -4.47101 | 0.75169  |
| H | -0.17027 | -3.48312 | 1.82019  |

|   |          |          |          |
|---|----------|----------|----------|
| H | -0.91134 | -4.47647 | 0.55113  |
| C | 0.22688  | -3.19231 | -1.62732 |
| H | -0.65705 | -3.77107 | -1.93986 |
| H | 0.35510  | -2.37261 | -2.34989 |
| H | 1.10132  | -3.85490 | -1.71834 |
| C | 1.28176  | 0.51956  | -0.95807 |
| H | 1.15731  | -0.18944 | -1.79490 |
| F | 0.90826  | 1.78788  | -1.56166 |

**1Ba:**  $\Delta G = -2454278.9$  kJ/mol

|   |          |          |          |
|---|----------|----------|----------|
| C | -1.30907 | -0.17973 | 1.59958  |
| C | -2.71333 | -0.57651 | 1.12165  |
| C | -2.79599 | -0.25230 | -0.38565 |
| N | -0.58151 | -0.09005 | 0.25340  |
| H | -2.85886 | -1.65625 | 1.27284  |
| H | -3.49198 | -0.06249 | 1.70140  |
| C | -0.66593 | -1.22031 | 2.49654  |
| H | 0.38051  | -0.97482 | 2.72888  |
| H | -1.21315 | -1.24274 | 3.44884  |
| H | -0.71055 | -2.23069 | 2.07204  |
| C | -1.26249 | 1.17871  | 2.28216  |
| H | -1.75007 | 1.09593  | 3.26291  |
| H | -0.22789 | 1.50779  | 2.45809  |
| H | -1.79054 | 1.95553  | 1.71432  |
| C | -3.45773 | -1.36543 | -1.19358 |
| H | -4.49768 | -1.50279 | -0.86403 |
| H | -3.47187 | -1.12680 | -2.26647 |
| H | -2.93486 | -2.32454 | -1.06496 |
| C | -3.48377 | 1.08716  | -0.67725 |
| H | -3.42633 | 1.34008  | -1.74573 |
| H | -4.54613 | 1.02381  | -0.40124 |
| H | -3.03534 | 1.91439  | -0.10949 |
| C | 0.85201  | 0.05586  | 0.17161  |
| C | 1.40970  | 1.34768  | 0.13193  |
| C | 1.63686  | -1.11319 | 0.13344  |
| C | 2.80633  | 1.44473  | 0.16994  |
| C | 3.02674  | -0.95724 | 0.17182  |
| C | 3.60638  | 0.30769  | 0.21854  |
| H | 3.27217  | 2.43300  | 0.13625  |
| H | 3.66493  | -1.84395 | 0.14101  |
| H | 4.69398  | 0.40768  | 0.25561  |
| C | 1.02623  | -2.47652 | -0.11957 |
| H | -0.03982 | -2.43492 | 0.15046  |
| C | 0.57262  | 2.58522  | -0.11974 |
| H | -0.47763 | 2.34328  | 0.09676  |
| C | 1.66103  | -3.59300 | 0.69314  |
| H | 1.63823  | -3.38379 | 1.77306  |
| H | 1.12817  | -4.54041 | 0.52683  |
| H | 2.71034  | -3.76541 | 0.41054  |
| C | 1.08843  | -2.75448 | -1.62224 |

|   |          |          |          |
|---|----------|----------|----------|
| H | 0.68110  | -1.90822 | -2.20029 |
| H | 2.13072  | -2.90566 | -1.94697 |
| H | 0.52757  | -3.66646 | -1.87819 |
| C | 0.95677  | 3.77081  | 0.75119  |
| H | 0.27449  | 4.61493  | 0.57408  |
| H | 0.91382  | 3.52884  | 1.82356  |
| H | 1.97293  | 4.13256  | 0.53335  |
| C | 0.64860  | 2.92125  | -1.60968 |
| H | 1.66305  | 3.25265  | -1.88492 |
| H | 0.40379  | 2.03973  | -2.22571 |
| H | -0.04448 | 3.73818  | -1.86331 |
| C | -1.36371 | -0.11729 | -0.77383 |
| H | -0.89198 | -0.03646 | -1.83478 |
| F | -0.00157 | 0.03885  | -3.02319 |

**1Bb:**  $\Delta G = -2454249.6$  kJ/mol

|   |          |          |          |
|---|----------|----------|----------|
| C | -0.74958 | -1.00051 | 1.39753  |
| C | -1.56136 | -2.21105 | 0.90257  |
| C | -1.71791 | -2.09558 | -0.63137 |
| N | -0.19288 | -0.47116 | 0.06284  |
| H | -1.02855 | -3.14000 | 1.15133  |
| H | -2.53676 | -2.25547 | 1.40434  |
| C | 0.38531  | -1.38154 | 2.32810  |
| H | 1.04259  | -0.52720 | 2.54602  |
| H | -0.05212 | -1.70399 | 3.28271  |
| H | 0.99027  | -2.21527 | 1.95063  |
| C | -1.61101 | 0.08135  | 2.02607  |
| H | -2.00795 | -0.32013 | 2.96993  |
| H | -1.00344 | 0.96227  | 2.28576  |
| H | -2.46064 | 0.39466  | 1.38185  |
| C | -1.33447 | -3.38457 | -1.35874 |
| H | -2.02272 | -4.18906 | -1.06324 |
| H | -1.40345 | -3.26564 | -2.44914 |
| H | -0.31230 | -3.70700 | -1.11064 |
| C | -3.10799 | -1.61825 | -1.06945 |
| H | -3.14697 | -1.49860 | -2.16296 |
| H | -3.84394 | -2.38951 | -0.79650 |
| H | -3.39052 | -0.65420 | -0.59554 |
| C | 0.82139  | 0.55452  | -0.03185 |
| C | 0.42776  | 1.90340  | -0.12249 |
| C | 2.16959  | 0.14452  | -0.06276 |
| C | 1.44790  | 2.86273  | -0.15832 |
| C | 3.14278  | 1.14905  | -0.10372 |
| C | 2.78869  | 2.49467  | -0.13040 |
| H | 1.17621  | 3.91938  | -0.22837 |
| H | 4.19789  | 0.86546  | -0.13304 |
| H | 3.56632  | 3.26196  | -0.15673 |
| C | 2.58675  | -1.30953 | -0.16786 |
| H | 1.71809  | -1.94066 | 0.07129  |
| C | -1.01206 | 2.32972  | -0.28586 |



|   |          |          |          |
|---|----------|----------|----------|
| H | -1.69774 | 1.49761  | -0.06921 |
| C | 3.69992  | -1.67623 | 0.80301  |
| H | 3.43893  | -1.42758 | 1.84190  |
| H | 3.90821  | -2.75499 | 0.76048  |
| H | 4.64083  | -1.15839 | 0.56411  |
| C | 2.97818  | -1.63030 | -1.60826 |
| H | 2.15820  | -1.41947 | -2.31096 |
| H | 3.84901  | -1.03735 | -1.92821 |
| H | 3.24348  | -2.69266 | -1.71346 |
| C | -1.41171 | 3.45917  | 0.65403  |
| H | -2.50213 | 3.59653  | 0.61419  |
| H | -1.14833 | 3.23991  | 1.69958  |
| H | -0.94397 | 4.42021  | 0.38854  |
| C | -1.28884 | 2.70958  | -1.73866 |
| H | -0.72184 | 3.60103  | -2.05213 |
| H | -1.03199 | 1.89325  | -2.43124 |
| H | -2.35981 | 2.92684  | -1.87030 |
| C | -0.73597 | -1.03459 | -0.95577 |
| H | -0.46190 | -0.72292 | -1.97018 |
| F | -3.77854 | 1.07330  | 0.17494  |

TS **1A** → **1Ba**:  $\Delta G = -2454260.3$  kJ/mol

|   |          |          |          |
|---|----------|----------|----------|
| C | -1.13976 | -0.38418 | 1.60605  |
| C | -2.47464 | -1.02044 | 1.19224  |
| C | -2.69740 | -0.70083 | -0.30116 |
| N | -0.49981 | -0.17461 | 0.23294  |
| H | -2.41430 | -2.11073 | 1.32469  |
| H | -3.29958 | -0.66305 | 1.82360  |
| C | -0.29338 | -1.29198 | 2.47532  |
| H | 0.70429  | -0.86674 | 2.65760  |
| H | -0.78418 | -1.39689 | 3.45261  |
| H | -0.18454 | -2.29834 | 2.05357  |
| C | -1.29753 | 0.96401  | 2.29425  |
| H | -1.70455 | 0.80072  | 3.30121  |
| H | -0.32921 | 1.47239  | 2.41107  |
| H | -1.98653 | 1.63491  | 1.76587  |
| C | -3.23771 | -1.89163 | -1.08365 |
| H | -4.22708 | -2.17526 | -0.69527 |
| H | -3.33969 | -1.65277 | -2.15039 |
| H | -2.56991 | -2.75951 | -1.00477 |
| C | -3.60143 | 0.51928  | -0.52494 |
| H | -3.65018 | 0.78664  | -1.59056 |
| H | -4.62222 | 0.28806  | -0.18806 |
| H | -3.25660 | 1.40372  | 0.02916  |
| C | 0.84751  | 0.30823  | 0.05402  |
| C | 1.04457  | 1.69583  | -0.12030 |
| C | 1.91512  | -0.61259 | 0.02933  |
| C | 2.36181  | 2.15376  | -0.23739 |
| C | 3.21109  | -0.09474 | -0.09072 |
| C | 3.43738  | 1.27237  | -0.20316 |

|   |          |          |          |
|---|----------|----------|----------|
| H | 2.54256  | 3.22297  | -0.37533 |
| H | 4.05743  | -0.78646 | -0.11599 |
| H | 4.45821  | 1.65207  | -0.29191 |
| C | 1.72714  | -2.11778 | 0.02540  |
| H | 0.65938  | -2.33120 | 0.19083  |
| C | -0.09682 | 2.68028  | -0.28721 |
| H | -1.03162 | 2.18476  | 0.00854  |
| C | 2.53350  | -2.80775 | 1.11886  |
| H | 2.34445  | -2.38631 | 2.11640  |
| H | 2.29045  | -3.87975 | 1.15884  |
| H | 3.61554  | -2.73286 | 0.93042  |
| C | 2.07220  | -2.68414 | -1.35033 |
| H | 1.37218  | -2.29606 | -2.10597 |
| H | 3.10809  | -2.44435 | -1.63771 |
| H | 1.98150  | -3.78145 | -1.34225 |
| C | 0.05523  | 3.91859  | 0.58517  |
| H | -0.83409 | 4.56001  | 0.50082  |
| H | 0.18100  | 3.66278  | 1.64732  |
| H | 0.91977  | 4.53048  | 0.28668  |
| C | -0.24595 | 3.05748  | -1.75904 |
| H | 0.65108  | 3.57452  | -2.13412 |
| H | -0.40704 | 2.17248  | -2.39212 |
| H | -1.10215 | 3.73312  | -1.90430 |
| C | -1.32703 | -0.32987 | -0.75345 |
| H | -0.99435 | -0.31161 | -1.81201 |
| F | -0.60141 | -1.70971 | -2.61831 |

**2A:**  $\Delta G = -2717843.7$  kJ/mol

|   |          |          |          |
|---|----------|----------|----------|
| C | 0.82811  | -0.69500 | 1.49924  |
| C | 2.08713  | -1.46559 | 1.06945  |
| C | 1.87569  | -1.93231 | -0.38122 |
| N | 0.24587  | -0.33487 | 0.16094  |
| H | 2.94884  | -0.78154 | 1.09461  |
| H | 2.31163  | -2.29962 | 1.75032  |
| C | 1.18223  | 0.53114  | 2.32927  |
| H | 0.29511  | 1.15092  | 2.52912  |
| H | 1.57904  | 0.21146  | 3.30364  |
| H | 1.94902  | 1.15262  | 1.84958  |
| C | -0.15467 | -1.54022 | 2.30511  |
| H | 0.25473  | -1.73226 | 3.30695  |
| H | -1.11019 | -1.01078 | 2.44062  |
| H | -0.36594 | -2.51460 | 1.84721  |
| C | 3.18617  | -2.02843 | -1.15040 |
| H | 3.79247  | -2.85375 | -0.74909 |
| H | 3.01333  | -2.23572 | -2.21676 |
| H | 3.78392  | -1.11192 | -1.07594 |
| C | 1.16686  | -3.28474 | -0.47058 |
| H | 0.96606  | -3.55606 | -1.51814 |
| H | 1.80298  | -4.07125 | -0.03991 |
| H | 0.20986  | -3.31217 | 0.06529  |

|   |          |          |          |
|---|----------|----------|----------|
| C | -0.94485 | 0.44857  | -0.00353 |
| C | -2.19754 | -0.20058 | -0.13788 |
| C | -0.86690 | 1.86261  | -0.05609 |
| C | -3.35262 | 0.58054  | -0.26593 |
| C | -2.05240 | 2.59864  | -0.17838 |
| C | -3.28870 | 1.96955  | -0.27032 |
| H | -4.32095 | 0.08345  | -0.37478 |
| H | -1.99636 | 3.69049  | -0.21921 |
| H | -4.20239 | 2.56208  | -0.36528 |
| C | 0.44859  | 2.61061  | -0.07295 |
| H | 1.23984  | 1.88200  | 0.12640  |
| C | -2.33088 | -1.70603 | -0.22870 |
| H | -1.35804 | -2.13754 | 0.03513  |
| C | 0.53334  | 3.70248  | 0.98518  |
| H | 0.31749  | 3.32606  | 1.99537  |
| H | 1.54306  | 4.14038  | 1.00497  |
| H | -0.16917 | 4.52624  | 0.78401  |
| C | 0.72064  | 3.18861  | -1.45898 |
| H | 0.66105  | 2.41920  | -2.24062 |
| H | 0.00370  | 3.98522  | -1.71426 |
| H | 1.73005  | 3.62646  | -1.50307 |
| C | -3.36400 | -2.27012 | 0.73747  |
| H | -3.35918 | -3.37007 | 0.71137  |
| H | -3.17096 | -1.96265 | 1.77564  |
| H | -4.38581 | -1.94924 | 0.48273  |
| C | -2.63709 | -2.13228 | -1.66190 |
| H | -3.61568 | -1.75152 | -1.99508 |
| H | -1.88204 | -1.76292 | -2.37165 |
| H | -2.66515 | -3.22928 | -1.74810 |
| C | 0.93411  | -0.84937 | -0.89878 |
| H | 0.32567  | -1.09640 | -1.77938 |
| F | 1.82751  | 0.25220  | -1.57393 |
| H | 2.91245  | 0.97250  | -0.69851 |
| F | 3.57261  | 1.41733  | -0.17721 |

**2Ba:** -2717840.0 kJ/mol

|   |          |          |          |
|---|----------|----------|----------|
| C | 0.61848  | -0.88233 | -1.93472 |
| C | 1.94409  | -1.60342 | -1.63588 |
| C | 2.45293  | -1.09605 | -0.26961 |
| N | 0.26347  | -0.37416 | -0.53148 |
| H | 1.76516  | -2.68700 | -1.57958 |
| H | 2.67597  | -1.43695 | -2.43746 |
| C | -0.46321 | -1.80987 | -2.45341 |
| H | -1.43688 | -1.30438 | -2.52936 |
| H | -0.18504 | -2.13250 | -3.46581 |
| H | -0.57315 | -2.71354 | -1.84178 |
| C | 0.76523  | 0.30652  | -2.87186 |
| H | 0.95653  | -0.07072 | -3.88525 |
| H | -0.15630 | 0.90529  | -2.91321 |
| H | 1.60246  | 0.96163  | -2.60025 |

|   |          |          |          |
|---|----------|----------|----------|
| C | 2.98397  | -2.20166 | 0.63740  |
| H | 3.86892  | -2.66908 | 0.18319  |
| H | 3.27612  | -1.79197 | 1.61449  |
| H | 2.23206  | -2.98684 | 0.80293  |
| C | 3.49075  | 0.03029  | -0.38332 |
| H | 3.68663  | 0.47139  | 0.60357  |
| H | 4.43053  | -0.37999 | -0.77964 |
| H | 3.15755  | 0.82998  | -1.05952 |
| C | -0.99143 | 0.26250  | -0.20931 |
| C | -1.07167 | 1.66727  | -0.28164 |
| C | -2.06611 | -0.54523 | 0.20697  |
| C | -2.32226 | 2.24699  | -0.03747 |
| C | -3.29132 | 0.08951  | 0.44001  |
| C | -3.42624 | 1.46659  | 0.29251  |
| H | -2.42354 | 3.33406  | -0.08551 |
| H | -4.14669 | -0.50705 | 0.76726  |
| H | -4.39364 | 1.94152  | 0.47309  |
| C | -1.88999 | -2.00871 | 0.55702  |
| H | -0.93858 | -2.35654 | 0.12807  |
| C | 0.15166  | 2.54375  | -0.46253 |
| H | 0.96047  | 1.92962  | -0.88196 |
| C | -2.99542 | -2.89781 | 0.00927  |
| H | -3.10778 | -2.79395 | -1.07989 |
| H | -2.78057 | -3.95492 | 0.22236  |
| H | -3.97033 | -2.67218 | 0.46681  |
| C | -1.75977 | -2.13886 | 2.07445  |
| H | -0.96305 | -1.49103 | 2.47164  |
| H | -2.69751 | -1.85305 | 2.57676  |
| H | -1.53524 | -3.17744 | 2.36004  |
| C | -0.07291 | 3.70652  | -1.41633 |
| H | 0.86502  | 4.25758  | -1.57630 |
| H | -0.43289 | 3.37035  | -2.39992 |
| H | -0.80361 | 4.42941  | -1.02365 |
| C | 0.63269  | 3.02231  | 0.90753  |
| H | -0.10695 | 3.69278  | 1.37353  |
| H | 0.79837  | 2.18342  | 1.59991  |
| H | 1.57536  | 3.58288  | 0.81447  |
| C | 1.22672  | -0.49751 | 0.31275  |
| H | 1.07965  | -0.15709 | 1.36215  |
| F | 0.55857  | 0.32220  | 2.98633  |
| H | 1.82575  | 0.54952  | 2.94352  |
| F | 2.83629  | 0.71681  | 2.81419  |

**2Bb:**  $\Delta G = -2717830.5$  kJ/mol

|   |          |          |          |
|---|----------|----------|----------|
| C | -0.63994 | -0.96257 | 1.26308  |
| C | -1.63718 | -1.98484 | 0.68071  |
| C | -1.50405 | -1.97460 | -0.86107 |
| N | 0.05396  | -0.45752 | -0.01361 |
| H | -1.42960 | -2.98679 | 1.07944  |
| H | -2.65923 | -1.70873 | 0.97210  |

|   |          |          |          |
|---|----------|----------|----------|
| C | 0.39400  | -1.58382 | 2.18309  |
| H | 1.18217  | -0.86796 | 2.45867  |
| H | -0.11070 | -1.88691 | 3.11023  |
| H | 0.85665  | -2.48144 | 1.75309  |
| C | -1.33439 | 0.19947  | 1.94934  |
| H | -1.76635 | -0.17301 | 2.88860  |
| H | -0.63067 | 1.00438  | 2.20781  |
| H | -2.15963 | 0.59426  | 1.34316  |
| C | -1.08882 | -3.32829 | -1.43948 |
| H | -1.88045 | -4.06521 | -1.24449 |
| H | -0.93921 | -3.27288 | -2.52699 |
| H | -0.16053 | -3.70018 | -0.98182 |
| C | -2.76442 | -1.45002 | -1.55706 |
| H | -2.61120 | -1.34970 | -2.64134 |
| H | -3.58527 | -2.16359 | -1.39478 |
| H | -3.07457 | -0.48057 | -1.14063 |
| C | 1.11953  | 0.52163  | -0.01167 |
| C | 0.78035  | 1.88593  | -0.11165 |
| C | 2.45132  | 0.06623  | 0.05140  |
| C | 1.82986  | 2.81045  | -0.05687 |
| C | 3.45705  | 1.03875  | 0.10190  |
| C | 3.15162  | 2.39539  | 0.06887  |
| H | 1.60061  | 3.87649  | -0.13351 |
| H | 4.50131  | 0.71942  | 0.14895  |
| H | 3.95413  | 3.13560  | 0.11363  |
| C | 2.83218  | -1.39734 | -0.05028 |
| H | 1.92505  | -2.00356 | 0.08068  |
| C | -0.63057 | 2.35918  | -0.38267 |
| H | -1.33271 | 1.53881  | -0.19289 |
| C | 3.82715  | -1.82600 | 1.01855  |
| H | 3.46710  | -1.59907 | 2.03233  |
| H | 4.00740  | -2.90929 | 0.96370  |
| H | 4.80252  | -1.33242 | 0.89356  |
| C | 3.36121  | -1.69544 | -1.45107 |
| H | 2.62778  | -1.43612 | -2.22903 |
| H | 4.28129  | -1.12857 | -1.66164 |
| H | 3.59882  | -2.76404 | -1.55883 |
| C | -1.05958 | 3.51348  | 0.51136  |
| H | -2.13052 | 3.71552  | 0.36844  |
| H | -0.90623 | 3.28839  | 1.57718  |
| H | -0.51596 | 4.44391  | 0.28641  |
| C | -0.79336 | 2.71656  | -1.85762 |
| H | -0.16638 | 3.57617  | -2.14301 |
| H | -0.52238 | 1.87636  | -2.51500 |
| H | -1.84080 | 2.97844  | -2.06990 |
| C | -0.41320 | -0.99819 | -1.08045 |
| H | -0.00696 | -0.72394 | -2.06075 |
| F | -3.63505 | 1.39457  | -0.16986 |
| H | -4.07780 | 0.45245  | 0.48985  |
| F | -4.44361 | -0.37227 | 1.06003  |

**2Bc:**  $\Delta G = -2717837.4$  kJ/mol

|   |          |          |          |
|---|----------|----------|----------|
| C | -0.95053 | 0.16572  | 1.79668  |
| C | -2.44842 | -0.11520 | 1.56115  |
| C | -2.72296 | 0.05469  | 0.05597  |
| N | -0.40804 | 0.04936  | 0.39748  |
| H | -2.67396 | -1.15253 | 1.85156  |
| H | -3.08584 | 0.53634  | 2.17651  |
| C | -0.32938 | -0.86470 | 2.72922  |
| H | 0.76035  | -0.73115 | 2.80742  |
| H | -0.74514 | -0.74610 | 3.74022  |
| H | -0.53431 | -1.89424 | 2.40730  |
| C | -0.68171 | 1.55287  | 2.37103  |
| H | -0.99607 | 1.58331  | 3.42375  |
| H | 0.39234  | 1.79229  | 2.34548  |
| H | -1.22454 | 2.35019  | 1.84771  |
| C | -3.83225 | -0.85386 | -0.45503 |
| H | -4.80580 | -0.51536 | -0.07144 |
| H | -3.88436 | -0.83361 | -1.55444 |
| H | -3.69046 | -1.89610 | -0.14645 |
| C | -3.07342 | 1.49751  | -0.31254 |
| H | -3.13454 | 1.62558  | -1.40391 |
| H | -4.05438 | 1.76128  | 0.10797  |
| H | -2.35211 | 2.23109  | 0.06857  |
| C | 0.98049  | 0.21553  | 0.06896  |
| C | 1.45125  | 1.49873  | -0.30771 |
| C | 1.86830  | -0.88728 | 0.10462  |
| C | 2.81385  | 1.66558  | -0.58093 |
| C | 3.22380  | -0.66535 | -0.17450 |
| C | 3.70137  | 0.59828  | -0.49970 |
| H | 3.18085  | 2.65266  | -0.87580 |
| H | 3.91451  | -1.51315 | -0.15150 |
| H | 4.76330  | 0.74791  | -0.71139 |
| C | 1.41474  | -2.31480 | 0.33025  |
| H | 0.36386  | -2.28768 | 0.63791  |
| C | 0.52103  | 2.67459  | -0.51587 |
| H | -0.44147 | 2.41145  | -0.06402 |
| C | 2.21442  | -3.03075 | 1.41051  |
| H | 2.20965  | -2.48287 | 2.36413  |
| H | 1.79635  | -4.03031 | 1.60231  |
| H | 3.26649  | -3.17635 | 1.12053  |
| C | 1.46721  | -3.08689 | -0.98616 |
| H | 0.86442  | -2.60225 | -1.76662 |
| H | 2.49887  | -3.17504 | -1.36264 |
| H | 1.07735  | -4.10824 | -0.85633 |
| C | 1.00770  | 3.95380  | 0.14996  |
| H | 0.24845  | 4.74557  | 0.06603  |
| H | 1.21722  | 3.80823  | 1.21999  |
| H | 1.92547  | 4.34291  | -0.31686 |
| C | 0.26718  | 2.89181  | -2.00509 |

|   |          |          |          |
|---|----------|----------|----------|
| H | 1.19179  | 3.17095  | -2.53499 |
| H | -0.12846 | 1.98616  | -2.48844 |
| H | -0.46233 | 3.70024  | -2.16633 |
| C | -1.35388 | -0.27960 | -0.51492 |
| H | -1.13665 | 0.00925  | -1.55180 |
| F | -1.38725 | -1.87632 | -0.73699 |
| H | -1.43127 | -2.03744 | -2.27244 |
| F | -1.42009 | -1.97287 | -3.22187 |

**2Bd:**  $\Delta G = -2717820.5$  kJ/mol

|   |          |          |          |
|---|----------|----------|----------|
| C | 0.24684  | 1.19275  | 1.33054  |
| C | 0.46515  | 2.63967  | 0.85945  |
| C | 0.52448  | 2.63725  | -0.68479 |
| N | -0.22444 | 0.54130  | 0.01646  |
| H | -0.37489 | 3.26549  | 1.19341  |
| H | 1.37744  | 3.06108  | 1.30116  |
| C | -0.81270 | 1.05857  | 2.40495  |
| H | -1.04582 | 0.00640  | 2.62257  |
| H | -0.41613 | 1.49995  | 3.32918  |
| H | -1.73962 | 1.59176  | 2.16228  |
| C | 1.53010  | 0.51272  | 1.77031  |
| H | 1.86841  | 0.99106  | 2.69996  |
| H | 1.36711  | -0.55162 | 1.99474  |
| H | 2.33636  | 0.59636  | 1.03068  |
| C | -0.36154 | 3.71858  | -1.30446 |
| H | 0.01074  | 4.70890  | -1.00654 |
| H | -0.34716 | 3.66881  | -2.40213 |
| H | -1.40516 | 3.63533  | -0.96824 |
| C | 1.94644  | 2.73068  | -1.25001 |
| H | 1.93044  | 2.68393  | -2.34877 |
| H | 2.37624  | 3.70188  | -0.96541 |
| H | 2.60615  | 1.92700  | -0.88603 |
| C | -0.83944 | -0.76525 | -0.05875 |
| C | -0.03420 | -1.90249 | -0.26169 |
| C | -2.24451 | -0.82609 | 0.04249  |
| C | -0.68260 | -3.14385 | -0.28178 |
| C | -2.83330 | -2.09490 | 0.01216  |
| C | -2.06109 | -3.24364 | -0.12902 |
| H | -0.08882 | -4.04757 | -0.44055 |
| H | -3.92063 | -2.17872 | 0.08265  |
| H | -2.54208 | -4.22458 | -0.14598 |
| C | -3.12430 | 0.40900  | 0.06647  |
| H | -2.49653 | 1.28361  | 0.29295  |
| C | 1.44505  | -1.82314 | -0.56563 |
| H | 1.83048  | -0.83050 | -0.30256 |
| C | -4.21049 | 0.34154  | 1.13057  |
| H | -3.79709 | 0.14064  | 2.12952  |
| H | -4.75798 | 1.29365  | 1.18113  |
| H | -4.95167 | -0.44207 | 0.91408  |
| C | -3.71969 | 0.64312  | -1.31980 |

|   |          |          |          |
|---|----------|----------|----------|
| H | -2.93974 | 0.74548  | -2.08897 |
| H | -4.37225 | -0.19125 | -1.62034 |
| H | -4.32611 | 1.56079  | -1.33441 |
| C | 2.27170  | -2.83331 | 0.21715  |
| H | 3.34125  | -2.63299 | 0.07149  |
| H | 2.07884  | -2.77290 | 1.29872  |
| H | 2.07735  | -3.86958 | -0.09977 |
| C | 1.68161  | -1.97185 | -2.06651 |
| H | 1.38559  | -2.96803 | -2.43233 |
| H | 1.11778  | -1.22549 | -2.64660 |
| H | 2.74802  | -1.82943 | -2.29454 |
| C | -0.03187 | 1.29974  | -1.00266 |
| H | -0.28246 | 0.94643  | -2.00920 |
| F | 3.80115  | 0.23830  | -0.58163 |
| H | 4.14144  | -0.29994 | 0.51871  |
| F | 4.40416  | -0.73913 | 1.42607  |

**2Be:**  $\Delta G = -2717822.9$  kJ/mol

|   |          |          |          |
|---|----------|----------|----------|
| C | -0.09537 | -1.27478 | 1.41508  |
| C | -0.71251 | -2.59183 | 0.91939  |
| C | -1.12486 | -2.39935 | -0.55745 |
| N | 0.18716  | -0.57651 | 0.07285  |
| H | 0.03238  | -3.39691 | 0.99327  |
| H | -1.56628 | -2.88333 | 1.54493  |
| C | 1.17706  | -1.47237 | 2.21318  |
| H | 1.68914  | -0.52048 | 2.41470  |
| H | 0.90192  | -1.90219 | 3.18577  |
| H | 1.87864  | -2.16827 | 1.73799  |
| C | -1.06204 | -0.39461 | 2.18849  |
| H | -1.27392 | -0.88493 | 3.14894  |
| H | -0.60413 | 0.57877  | 2.42012  |
| H | -2.02131 | -0.22825 | 1.67365  |
| C | -0.63882 | -3.53475 | -1.45877 |
| H | -1.10939 | -4.47655 | -1.14346 |
| H | -0.91066 | -3.35625 | -2.50844 |
| H | 0.45146  | -3.66598 | -1.40145 |
| C | -2.63012 | -2.18560 | -0.74316 |
| H | -2.86985 | -1.93694 | -1.78645 |
| H | -3.14977 | -3.12124 | -0.49090 |
| H | -3.02449 | -1.38155 | -0.10570 |
| C | 0.94292  | 0.64897  | -0.02038 |
| C | 0.25923  | 1.88069  | -0.01043 |
| C | 2.34580  | 0.55047  | -0.11750 |
| C | 1.04616  | 3.03997  | 0.01278  |
| C | 3.07529  | 1.74337  | -0.10043 |
| C | 2.43465  | 2.97555  | -0.00734 |
| H | 0.54951  | 4.01382  | 0.02320  |
| H | 4.16454  | 1.70231  | -0.17998 |
| H | 3.02347  | 3.89566  | 0.01556  |
| C | 3.05567  | -0.76537 | -0.36930 |



|   |          |          |          |
|---|----------|----------|----------|
| H | 2.35657  | -1.58567 | -0.14962 |
| C | -1.24204 | 2.01467  | -0.16157 |
| H | -1.72648 | 1.03055  | -0.07058 |
| C | 4.28535  | -0.95679 | 0.50591  |
| H | 4.05337  | -0.84602 | 1.57497  |
| H | 4.70992  | -1.96025 | 0.35880  |
| H | 5.07907  | -0.23506 | 0.26207  |
| C | 3.40805  | -0.87771 | -1.85100 |
| H | 2.51628  | -0.79782 | -2.49044 |
| H | 4.10712  | -0.08416 | -2.15721 |
| H | 3.88798  | -1.84392 | -2.06562 |
| C | -1.87806 | 2.91075  | 0.89167  |
| H | -2.97062 | 2.90333  | 0.77442  |
| H | -1.65689 | 2.57208  | 1.91422  |
| H | -1.54160 | 3.95541  | 0.80549  |
| C | -1.55278 | 2.53084  | -1.56554 |
| H | -1.14023 | 3.53984  | -1.72317 |
| H | -1.13101 | 1.87561  | -2.34287 |
| H | -2.63840 | 2.56517  | -1.71968 |
| C | -0.40696 | -1.14979 | -0.91108 |
| H | -0.35567 | -0.71675 | -1.91657 |
| F | -3.90452 | 0.27760  | 0.98866  |
| H | -3.95838 | 0.51168  | -0.22120 |
| F | -4.00462 | 0.69240  | -1.26866 |

**3Ba:**  $\Delta G = -2981366.0$  kJ/mol

|   |          |          |          |
|---|----------|----------|----------|
| C | 0.62091  | 0.90704  | -1.74610 |
| C | 1.76776  | 1.84804  | -1.35050 |
| C | 1.58742  | 2.20625  | 0.13710  |
| N | 0.16634  | 0.42043  | -0.36129 |
| H | 2.72383  | 1.32123  | -1.47662 |
| H | 1.79211  | 2.73815  | -1.99333 |
| C | 1.08468  | -0.24713 | -2.60779 |
| H | 0.26785  | -0.95263 | -2.81468 |
| H | 1.41502  | 0.15735  | -3.57439 |
| H | 1.93253  | -0.78245 | -2.16350 |
| C | -0.54849 | 1.60948  | -2.41977 |
| H | -0.24075 | 1.90443  | -3.43182 |
| H | -1.41545 | 0.94096  | -2.52313 |
| H | -0.86519 | 2.51976  | -1.89560 |
| C | 2.90942  | 2.28243  | 0.89106  |
| H | 3.48322  | 3.14539  | 0.52390  |
| H | 2.74861  | 2.41863  | 1.96937  |
| H | 3.50637  | 1.37688  | 0.74368  |
| C | 0.81329  | 3.51767  | 0.35559  |
| H | 0.57459  | 3.66614  | 1.41871  |
| H | 1.44053  | 4.35899  | 0.02929  |
| H | -0.12451 | 3.56037  | -0.21377 |
| C | -0.91796 | -0.52340 | -0.18324 |
| C | -2.21412 | -0.01082 | 0.04961  |

|   |          |          |          |
|---|----------|----------|----------|
| C | -0.66241 | -1.90844 | -0.26044 |
| C | -3.26861 | -0.92802 | 0.12504  |
| C | -1.75873 | -2.77563 | -0.18512 |
| C | -3.05138 | -2.29450 | -0.01352 |
| H | -4.28043 | -0.55758 | 0.30816  |
| H | -1.58278 | -3.85344 | -0.23842 |
| H | -3.89252 | -2.98983 | 0.04090  |
| C | 0.73373  | -2.48993 | -0.28118 |
| H | 1.44301  | -1.65783 | -0.36257 |
| C | -2.49911 | 1.45465  | 0.30970  |
| H | -1.61563 | 2.03953  | 0.02190  |
| C | 0.97796  | -3.45785 | -1.43091 |
| H | 0.74694  | -3.02542 | -2.41382 |
| H | 2.03336  | -3.76902 | -1.44644 |
| H | 0.37493  | -4.37286 | -1.32436 |
| C | 1.02129  | -3.17500 | 1.05334  |
| H | 0.78582  | -2.51776 | 1.89785  |
| H | 0.43389  | -4.10025 | 1.16403  |
| H | 2.08601  | -3.44476 | 1.12391  |
| C | -3.66836 | 1.98813  | -0.50629 |
| H | -3.77418 | 3.07283  | -0.35962 |
| H | -3.53549 | 1.80928  | -1.58309 |
| H | -4.62375 | 1.53111  | -0.20836 |
| C | -2.71657 | 1.68333  | 1.80366  |
| H | -3.61751 | 1.16009  | 2.16000  |
| H | -1.86818 | 1.32012  | 2.40216  |
| H | -2.84812 | 2.75400  | 2.02028  |
| C | 0.69728  | 1.10381  | 0.59809  |
| H | 0.36892  | 0.94680  | 1.62786  |
| F | 3.57593  | -0.87517 | -0.12247 |
| H | 3.02956  | -0.73078 | 0.68534  |
| F | 2.26187  | -0.44199 | 1.81763  |
| H | 1.14833  | -0.57170 | 2.64205  |
| F | 0.31071  | -0.58277 | 3.16520  |

**3Bb:**  $\Delta G = -2981365.6$  kJ/mol

|   |          |          |          |
|---|----------|----------|----------|
| C | 0.69688  | -0.35319 | -2.22685 |
| C | 2.09403  | -0.96449 | -2.03017 |
| C | 2.56020  | -0.61488 | -0.59966 |
| N | 0.28671  | -0.14409 | -0.76006 |
| H | 2.03111  | -2.05729 | -2.13591 |
| H | 2.79616  | -0.60313 | -2.79294 |
| C | -0.27450 | -1.27791 | -2.93350 |
| H | -1.30104 | -0.88421 | -2.91722 |
| H | 0.02820  | -1.35086 | -3.98661 |
| H | -0.27154 | -2.29460 | -2.52402 |
| C | 0.71480  | 0.99435  | -2.93155 |
| H | 0.96621  | 0.82785  | -3.98740 |
| H | -0.27122 | 1.47988  | -2.90149 |
| H | 1.46386  | 1.68100  | -2.51835 |

|   |          |          |          |
|---|----------|----------|----------|
| C | 3.20953  | -1.78327 | 0.13810  |
| H | 4.13616  | -2.08102 | -0.37211 |
| H | 3.45632  | -1.49594 | 1.16900  |
| H | 2.54415  | -2.65836 | 0.17641  |
| C | 3.47675  | 0.61517  | -0.54041 |
| H | 3.67582  | 0.89796  | 0.50111  |
| H | 4.43225  | 0.37376  | -1.02706 |
| H | 3.04189  | 1.48125  | -1.05806 |
| C | -1.04342 | 0.21146  | -0.32431 |
| C | -1.34595 | 1.57100  | -0.12006 |
| C | -1.94708 | -0.82862 | -0.03887 |
| C | -2.64486 | 1.87683  | 0.30231  |
| C | -3.23043 | -0.46133 | 0.38051  |
| C | -3.58322 | 0.87575  | 0.53145  |
| H | -2.91486 | 2.92139  | 0.47634  |
| H | -3.95689 | -1.24324 | 0.61638  |
| H | -4.59143 | 1.13938  | 0.86003  |
| C | -1.54600 | -2.29060 | -0.03780 |
| H | -0.57664 | -2.38793 | -0.54831 |
| C | -0.30574 | 2.66991  | -0.21141 |
| H | 0.55757  | 2.28548  | -0.77099 |
| C | -2.54464 | -3.17424 | -0.77135 |
| H | -2.73048 | -2.82526 | -1.79765 |
| H | -2.17288 | -4.20723 | -0.83255 |
| H | -3.51475 | -3.21338 | -0.25348 |
| C | -1.32676 | -2.76800 | 1.39618  |
| H | -0.52994 | -2.20337 | 1.89959  |
| H | -2.24246 | -2.65995 | 1.99875  |
| H | -1.04597 | -3.83180 | 1.40862  |
| C | -0.81030 | 3.90069  | -0.95079 |
| H | 0.00319  | 4.62797  | -1.08539 |
| H | -1.20198 | 3.65090  | -1.94780 |
| H | -1.61086 | 4.41612  | -0.39927 |
| C | 0.20301  | 3.02821  | 1.18398  |
| H | -0.61697 | 3.37047  | 1.83481  |
| H | 0.68241  | 2.17378  | 1.68283  |
| H | 0.94341  | 3.84011  | 1.12700  |
| C | 1.27405  | -0.27013 | 0.05337  |
| H | 1.12362  | -0.15419 | 1.13304  |
| F | -0.64452 | 0.17564  | 2.87166  |
| H | 0.14951  | -0.40061 | 2.97139  |
| F | 1.32274  | -1.16466 | 3.00545  |
| H | 2.23010  | -0.14207 | 2.84607  |
| F | 2.82434  | 0.63296  | 2.66294  |

**3Bc:**  $\Delta G = -2981363.5$  kJ/mol

|   |          |          |          |
|---|----------|----------|----------|
| C | 0.13063  | -1.06490 | 1.62069  |
| C | 1.14306  | -2.15543 | 1.24699  |
| C | 0.98821  | -2.44372 | -0.26138 |
| N | -0.16923 | -0.48191 | 0.22989  |

|   |          |          |          |
|---|----------|----------|----------|
| H | 2.15713  | -1.77589 | 1.43337  |
| H | 1.00127  | -3.05685 | 1.85779  |
| C | 0.70647  | -0.00621 | 2.53444  |
| H | -0.00646 | 0.81254  | 2.70899  |
| H | 0.90936  | -0.47128 | 3.50900  |
| H | 1.65401  | 0.39008  | 2.15362  |
| C | -1.16369 | -1.60302 | 2.20973  |
| H | -0.95415 | -1.96032 | 3.22682  |
| H | -1.92830 | -0.81707 | 2.29120  |
| H | -1.57845 | -2.44664 | 1.64403  |
| C | 2.33707  | -2.59457 | -0.95858 |
| H | 2.85980  | -3.46862 | -0.54441 |
| H | 2.21791  | -2.74873 | -2.03951 |
| H | 2.96294  | -1.70661 | -0.80491 |
| C | 0.09690  | -3.65520 | -0.56857 |
| H | -0.07381 | -3.75946 | -1.64961 |
| H | 0.59562  | -4.56844 | -0.21488 |
| H | -0.88189 | -3.59000 | -0.07386 |
| C | -0.99242 | 0.68895  | 0.03825  |
| C | -2.37399 | 0.50516  | -0.18349 |
| C | -0.39032 | 1.96264  | 0.08470  |
| C | -3.16805 | 1.65447  | -0.26684 |
| C | -1.23927 | 3.07326  | 0.00313  |
| C | -2.61339 | 2.92481  | -0.14888 |
| H | -4.24141 | 1.54657  | -0.44257 |
| H | -0.80268 | 4.07507  | 0.03895  |
| H | -3.25491 | 3.80742  | -0.20625 |
| C | 1.10941  | 2.18314  | 0.09967  |
| H | 1.61552  | 1.20676  | 0.15772  |
| C | -2.99942 | -0.85235 | -0.43911 |
| H | -2.28325 | -1.63145 | -0.14173 |
| C | 1.57663  | 3.03818  | 1.27220  |
| H | 1.22306  | 2.66636  | 2.24301  |
| H | 2.67601  | 3.06468  | 1.30707  |
| H | 1.22988  | 4.07835  | 1.17225  |
| C | 1.54854  | 2.82707  | -1.21421 |
| H | 1.24875  | 2.22766  | -2.08262 |
| H | 1.12351  | 3.83671  | -1.32578 |
| H | 2.64329  | 2.91858  | -1.24410 |
| C | -4.27392 | -1.07984 | 0.36123  |
| H | -4.64021 | -2.10633 | 0.21587  |
| H | -4.11697 | -0.93167 | 1.43942  |
| H | -5.08353 | -0.40411 | 0.04758  |
| C | -3.24771 | -1.03163 | -1.93502 |
| H | -3.96547 | -0.28785 | -2.31437 |
| H | -2.32114 | -0.92490 | -2.51819 |
| H | -3.66203 | -2.02892 | -2.14469 |
| C | 0.26207  | -1.23184 | -0.72334 |
| H | 0.04156  | -0.98576 | -1.76382 |
| F | 1.89886  | -0.01184 | -2.50589 |

|   |         |         |          |
|---|---------|---------|----------|
| H | 2.68801 | 0.21126 | -1.92615 |
| F | 3.75901 | 0.48752 | -1.15339 |
| H | 3.69527 | 0.26756 | 0.18372  |
| F | 3.65497 | 0.09106 | 1.16685  |

**3Bd:**  $\Delta G = -2981358.5$  kJ/mol

|   |          |          |          |
|---|----------|----------|----------|
| C | -0.55587 | -0.23032 | 2.17561  |
| C | -1.94187 | -0.89419 | 2.13529  |
| C | -2.50320 | -0.72194 | 0.70946  |
| N | -0.25267 | -0.11750 | 0.67422  |
| H | -1.84000 | -1.96582 | 2.35826  |
| H | -2.60800 | -0.46632 | 2.89624  |
| C | 0.48994  | -1.08454 | 2.85932  |
| H | 1.48922  | -0.63023 | 2.79925  |
| H | 0.23147  | -1.16384 | 3.92397  |
| H | 0.52713  | -2.10214 | 2.45083  |
| C | -0.56424 | 1.16339  | 2.78342  |
| H | -0.70980 | 1.06705  | 3.86760  |
| H | 0.39282  | 1.68139  | 2.62611  |
| H | -1.37672 | 1.79190  | 2.39759  |
| C | -3.21079 | -1.96487 | 0.18282  |
| H | -4.12906 | -2.13407 | 0.76279  |
| H | -3.49141 | -1.84028 | -0.87232 |
| H | -2.57886 | -2.85699 | 0.26293  |
| C | -3.43922 | 0.49070  | 0.56528  |
| H | -3.69111 | 0.66955  | -0.48955 |
| H | -4.37183 | 0.28922  | 1.11081  |
| H | -3.00085 | 1.41113  | 0.97428  |
| C | 0.98686  | 0.43523  | 0.17187  |
| C | 1.01858  | 1.81398  | -0.13334 |
| C | 2.11172  | -0.39872 | 0.01703  |
| C | 2.25123  | 2.36286  | -0.50320 |
| C | 3.31878  | 0.21049  | -0.34761 |
| C | 3.39708  | 1.57814  | -0.58178 |
| H | 2.30660  | 3.42651  | -0.74690 |
| H | 4.20720  | -0.41353 | -0.47625 |
| H | 4.35106  | 2.03138  | -0.86169 |
| C | 2.04268  | -1.91161 | 0.06246  |
| H | 1.03092  | -2.20354 | 0.38366  |
| C | -0.22549 | 2.67833  | -0.18450 |
| H | -1.02540 | 2.17547  | 0.37570  |
| C | 3.05743  | -2.53657 | 1.00998  |
| H | 2.96641  | -2.16143 | 2.03858  |
| H | 2.93109  | -3.62860 | 1.04199  |
| H | 4.08925  | -2.34359 | 0.67907  |
| C | 2.23114  | -2.44744 | -1.35686 |
| H | 1.54714  | -1.96042 | -2.06350 |
| H | 3.26130  | -2.27798 | -1.70755 |
| H | 2.04170  | -3.53030 | -1.39350 |
| C | -0.03171 | 4.04671  | 0.45237  |

|   |          |          |          |
|---|----------|----------|----------|
| H | -0.98567 | 4.59255  | 0.48255  |
| H | 0.34207  | 3.97240  | 1.48409  |
| H | 0.67464  | 4.67192  | -0.11384 |
| C | -0.70432 | 2.80206  | -1.63006 |
| H | 0.04493  | 3.31520  | -2.25298 |
| H | -0.90311 | 1.82318  | -2.09003 |
| H | -1.63491 | 3.38731  | -1.68175 |
| C | -1.27549 | -0.39295 | -0.05852 |
| H | -1.20947 | -0.29973 | -1.14634 |
| F | -0.80638 | -2.70099 | -1.48612 |
| H | -0.60346 | -1.97441 | -2.12925 |
| F | -0.37202 | -0.85625 | -2.92893 |
| H | -1.64320 | -0.29818 | -3.02974 |
| F | -2.55303 | 0.08784  | -2.97993 |

**3Be:**  $\Delta G = -2981350.3$  kJ/mol

|   |          |          |          |
|---|----------|----------|----------|
| C | -0.09961 | 1.15312  | 1.28648  |
| C | -0.29860 | 2.59583  | 0.78664  |
| C | 0.45464  | 2.74053  | -0.54975 |
| N | 0.37371  | 0.46605  | -0.01212 |
| H | -1.36777 | 2.77355  | 0.61427  |
| H | 0.04817  | 3.32274  | 1.53334  |
| C | -1.38722 | 0.53347  | 1.78753  |
| H | -1.27181 | -0.53663 | 2.01399  |
| H | -1.66249 | 1.03345  | 2.72650  |
| H | -2.21769 | 0.66996  | 1.08876  |
| C | 0.98719  | 1.00393  | 2.33945  |
| H | 0.61808  | 1.43684  | 3.27852  |
| H | 1.21699  | -0.05351 | 2.53501  |
| H | 1.91604  | 1.52710  | 2.08146  |
| C | -0.27389 | 3.58121  | -1.59242 |
| H | -0.36980 | 4.61134  | -1.22188 |
| H | 0.29456  | 3.61983  | -2.53254 |
| H | -1.27512 | 3.19115  | -1.79990 |
| C | 1.87663  | 3.30749  | -0.37489 |
| H | 2.46352  | 3.21778  | -1.30036 |
| H | 1.79655  | 4.37566  | -0.12871 |
| H | 2.43454  | 2.81998  | 0.43489  |
| C | 0.75155  | -0.93353 | -0.09946 |
| C | 2.12045  | -1.25662 | 0.04157  |
| C | -0.23131 | -1.91365 | -0.34554 |
| C | 2.47241  | -2.61038 | -0.01014 |
| C | 0.18436  | -3.24951 | -0.38687 |
| C | 1.51723  | -3.60032 | -0.20755 |
| H | 3.52475  | -2.88617 | 0.09454  |
| H | -0.55812 | -4.02664 | -0.58377 |
| H | 1.81701  | -4.65037 | -0.24307 |
| C | -1.66584 | -1.57554 | -0.67548 |
| H | -1.85777 | -0.54210 | -0.37586 |
| C | 3.22402  | -0.22565 | 0.16729  |

|   |          |          |          |
|---|----------|----------|----------|
| H | 2.76812  | 0.75136  | 0.36867  |
| C | -2.67063 | -2.46036 | 0.04647  |
| H | -2.49268 | -2.48461 | 1.13151  |
| H | -3.68387 | -2.06876 | -0.10870 |
| H | -2.64946 | -3.49850 | -0.31903 |
| C | -1.88192 | -1.61208 | -2.18575 |
| H | -1.18828 | -0.94043 | -2.71364 |
| H | -1.74092 | -2.62560 | -2.59392 |
| H | -2.90483 | -1.28938 | -2.43028 |
| C | 4.17335  | -0.51729 | 1.32151  |
| H | 4.89318  | 0.30524  | 1.44200  |
| H | 3.63873  | -0.63473 | 2.27510  |
| H | 4.75894  | -1.43333 | 1.15288  |
| C | 3.97962  | -0.09801 | -1.15235 |
| H | 4.48920  | -1.03803 | -1.41493 |
| H | 3.30855  | 0.15805  | -1.98550 |
| H | 4.74702  | 0.68766  | -1.08737 |
| C | 0.61099  | 1.31816  | -0.94846 |
| H | 0.99149  | 0.97664  | -1.91828 |
| F | -4.32616 | -0.43625 | 1.99668  |
| H | -4.27013 | -0.12193 | 1.06736  |
| F | -4.21464 | 0.31410  | -0.27227 |
| H | -3.20424 | 0.96859  | -0.81945 |
| F | -2.42442 | 1.45956  | -1.24290 |

**3Bf:**  $\Delta G = -2981336.5$  kJ/mol

|   |          |          |          |
|---|----------|----------|----------|
| C | -2.32932 | -0.14265 | 1.05458  |
| C | -3.35863 | -0.43460 | -0.04978 |
| C | -2.72029 | -0.05091 | -1.40382 |
| N | -1.04830 | -0.05824 | 0.21120  |
| H | -3.59679 | -1.50810 | -0.05192 |
| H | -4.29764 | 0.10521  | 0.13035  |
| C | -2.22045 | -1.24157 | 2.09404  |
| H | -1.36030 | -1.08636 | 2.76138  |
| H | -3.12377 | -1.21446 | 2.71793  |
| H | -2.15927 | -2.24397 | 1.65533  |
| C | -2.56194 | 1.18609  | 1.75678  |
| H | -3.46005 | 1.08954  | 2.38113  |
| H | -1.72560 | 1.44562  | 2.42109  |
| H | -2.73535 | 2.01272  | 1.05675  |
| C | -2.97648 | -1.08785 | -2.49391 |
| H | -4.05548 | -1.15933 | -2.69042 |
| H | -2.47904 | -0.81188 | -3.43403 |
| H | -2.62088 | -2.08488 | -2.19636 |
| C | -3.12702 | 1.34469  | -1.89553 |
| H | -2.56869 | 1.62661  | -2.79937 |
| H | -4.19743 | 1.34327  | -2.14464 |
| H | -2.95577 | 2.11783  | -1.13390 |
| C | 0.30234  | -0.02100 | 0.72735  |
| C | 0.92075  | 1.22778  | 0.92067  |

|   |          |          |          |
|---|----------|----------|----------|
| C | 0.98007  | -1.24626 | 0.87007  |
| C | 2.25910  | 1.21798  | 1.32988  |
| C | 2.31446  | -1.19243 | 1.28391  |
| C | 2.94725  | 0.02416  | 1.51757  |
| H | 2.77645  | 2.17033  | 1.47414  |
| H | 2.87681  | -2.12434 | 1.38600  |
| H | 3.99527  | 0.04246  | 1.82661  |
| C | 0.36227  | -2.57904 | 0.49336  |
| H | -0.71265 | -2.42611 | 0.32190  |
| C | 0.23770  | 2.54680  | 0.61931  |
| H | -0.82700 | 2.34846  | 0.44293  |
| C | 0.50660  | -3.61662 | 1.59782  |
| H | 0.09462  | -3.26261 | 2.55415  |
| H | -0.02170 | -4.54333 | 1.33011  |
| H | 1.55980  | -3.88519 | 1.77013  |
| C | 0.93459  | -3.08835 | -0.82567 |
| H | 0.80894  | -2.35206 | -1.63184 |
| H | 2.01071  | -3.29783 | -0.74682 |
| H | 0.43008  | -4.01845 | -1.12750 |
| C | 0.33296  | 3.52474  | 1.78242  |
| H | -0.24550 | 4.43589  | 1.57052  |
| H | -0.05341 | 3.09457  | 2.71809  |
| H | 1.37134  | 3.83917  | 1.96727  |
| C | 0.77746  | 3.16466  | -0.66591 |
| H | 1.84154  | 3.42485  | -0.57528 |
| H | 0.68669  | 2.47694  | -1.51805 |
| H | 0.22524  | 4.08520  | -0.90800 |
| C | -1.27794 | -0.00624 | -1.05420 |
| H | -0.41407 | 0.07257  | -1.74050 |
| F | 3.25264  | 1.69728  | -1.86827 |
| H | 2.49751  | 1.08095  | -1.96095 |
| F | 1.50343  | 0.06068  | -2.10291 |
| H | 2.58721  | -0.85690 | -1.87040 |
| F | 3.39564  | -1.39186 | -1.73859 |

**Method M06L/def2-SVPD**

**1A:**  $\Delta G = -2455050.2$  kJ/mol

|   |          |          |          |
|---|----------|----------|----------|
| C | -1.07730 | -0.57334 | 1.45366  |
| C | -2.41438 | -1.19842 | 1.02211  |
| C | -2.69604 | -0.73513 | -0.41857 |
| N | -0.46109 | -0.26134 | 0.12870  |
| H | -2.32056 | -2.29341 | 1.03367  |
| H | -3.22966 | -0.93917 | 1.70982  |
| C | -0.24226 | -1.55507 | 2.26717  |
| H | 0.74394  | -1.13531 | 2.50650  |
| H | -0.74435 | -1.76407 | 3.22061  |
| H | -0.10441 | -2.51047 | 1.74979  |
| C | -1.25016 | 0.69238  | 2.29425  |
| H | -1.62719 | 0.42753  | 3.29032  |
| H | -0.28648 | 1.19994  | 2.43769  |



|   |          |          |          |
|---|----------|----------|----------|
| H | -1.95420 | 1.40857  | 1.85892  |
| C | -3.49787 | -1.76621 | -1.20144 |
| H | -4.50751 | -1.85378 | -0.77789 |
| H | -3.60764 | -1.47486 | -2.25483 |
| H | -3.03560 | -2.75860 | -1.17297 |
| C | -3.44709 | 0.59721  | -0.46345 |
| H | -3.57784 | 0.94040  | -1.49889 |
| H | -4.44702 | 0.48096  | -0.02562 |
| H | -2.94494 | 1.39852  | 0.08772  |
| C | 0.83973  | 0.31711  | -0.01024 |
| C | 0.97597  | 1.72525  | -0.10298 |
| C | 1.98918  | -0.50880 | -0.07222 |
| C | 2.25730  | 2.28098  | -0.18750 |
| C | 3.25120  | 0.09523  | -0.14583 |
| C | 3.39150  | 1.47686  | -0.18888 |
| H | 2.36320  | 3.36521  | -0.26185 |
| H | 4.13972  | -0.53784 | -0.19038 |
| H | 4.38461  | 1.92704  | -0.24579 |
| C | 1.92120  | -2.02113 | -0.15678 |
| H | 0.87124  | -2.31039 | -0.04688 |
| C | -0.22110 | 2.64788  | -0.19475 |
| H | -1.10755 | 2.04651  | 0.02446  |
| C | 2.73924  | -2.71496 | 0.92752  |
| H | 2.46444  | -2.38508 | 1.93679  |
| H | 2.59393  | -3.80300 | 0.88244  |
| H | 3.81542  | -2.53021 | 0.80116  |
| C | 2.37673  | -2.48804 | -1.53902 |
| H | 1.81712  | -1.99638 | -2.34420 |
| H | 3.44418  | -2.27711 | -1.69833 |
| H | 2.23784  | -3.57249 | -1.64959 |
| C | -0.17178 | 3.79174  | 0.81093  |
| H | -1.10165 | 4.37576  | 0.77613  |
| H | -0.04451 | 3.43080  | 1.83968  |
| H | 0.65197  | 4.48723  | 0.59870  |
| C | -0.37695 | 3.18124  | -1.61771 |
| H | 0.46974  | 3.82438  | -1.89804 |
| H | -0.43343 | 2.37011  | -2.35567 |
| H | -1.29201 | 3.78249  | -1.71204 |
| C | -1.27472 | -0.53334 | -0.95928 |
| H | -1.18792 | 0.20168  | -1.77240 |
| F | -0.84995 | -1.77381 | -1.65020 |

**1Ba:**  $\Delta G = -2455036.6$  kJ/mol

|   |          |          |          |
|---|----------|----------|----------|
| C | -1.07730 | -0.57334 | 1.45366  |
| C | -2.41438 | -1.19842 | 1.02211  |
| C | -2.69604 | -0.73513 | -0.41857 |
| N | -0.46109 | -0.26134 | 0.12870  |
| H | -2.32056 | -2.29341 | 1.03367  |
| H | -3.22966 | -0.93917 | 1.70982  |
| C | -0.24226 | -1.55507 | 2.26717  |

|   |          |          |          |
|---|----------|----------|----------|
| H | 0.74394  | -1.13531 | 2.50650  |
| H | -0.74435 | -1.76407 | 3.22061  |
| H | -0.10441 | -2.51047 | 1.74979  |
| C | -1.25016 | 0.69238  | 2.29425  |
| H | -1.62719 | 0.42753  | 3.29032  |
| H | -0.28648 | 1.19994  | 2.43769  |
| H | -1.95420 | 1.40857  | 1.85892  |
| C | -3.49787 | -1.76621 | -1.20144 |
| H | -4.50751 | -1.85378 | -0.77789 |
| H | -3.60764 | -1.47486 | -2.25483 |
| H | -3.03560 | -2.75860 | -1.17297 |
| C | -3.44709 | 0.59721  | -0.46345 |
| H | -3.57784 | 0.94040  | -1.49889 |
| H | -4.44702 | 0.48096  | -0.02562 |
| H | -2.94494 | 1.39852  | 0.08772  |
| C | 0.83973  | 0.31711  | -0.01024 |
| C | 0.97597  | 1.72525  | -0.10298 |
| C | 1.98918  | -0.50880 | -0.07222 |
| C | 2.25730  | 2.28098  | -0.18750 |
| C | 3.25120  | 0.09523  | -0.14583 |
| C | 3.39150  | 1.47686  | -0.18888 |
| H | 2.36320  | 3.36521  | -0.26185 |
| H | 4.13972  | -0.53784 | -0.19038 |
| H | 4.38461  | 1.92704  | -0.24579 |
| C | 1.92120  | -2.02113 | -0.15678 |
| H | 0.87124  | -2.31039 | -0.04688 |
| C | -0.22110 | 2.64788  | -0.19475 |
| H | -1.10755 | 2.04651  | 0.02446  |
| C | 2.73924  | -2.71496 | 0.92752  |
| H | 2.46444  | -2.38508 | 1.93679  |
| H | 2.59393  | -3.80300 | 0.88244  |
| H | 3.81542  | -2.53021 | 0.80116  |
| C | 2.37673  | -2.48804 | -1.53902 |
| H | 1.81712  | -1.99638 | -2.34420 |
| H | 3.44418  | -2.27711 | -1.69833 |
| H | 2.23784  | -3.57249 | -1.64959 |
| C | -0.17178 | 3.79174  | 0.81093  |
| H | -1.10165 | 4.37576  | 0.77613  |
| H | -0.04451 | 3.43080  | 1.83968  |
| H | 0.65197  | 4.48723  | 0.59870  |
| C | -0.37695 | 3.18124  | -1.61771 |
| H | 0.46974  | 3.82438  | -1.89804 |
| H | -0.43343 | 2.37011  | -2.35567 |
| H | -1.29201 | 3.78249  | -1.71204 |
| C | -1.27472 | -0.53334 | -0.95928 |
| H | -1.18792 | 0.20168  | -1.77240 |
| F | -0.84995 | -1.77381 | -1.65020 |

**1Bb:**  $\Delta G = -2455014.6$  kJ/mol

|   |          |          |         |
|---|----------|----------|---------|
| C | -0.63272 | -1.10788 | 1.34716 |
|---|----------|----------|---------|

|   |          |          |          |
|---|----------|----------|----------|
| C | -1.34325 | -2.36623 | 0.82010  |
| C | -1.56666 | -2.17662 | -0.69760 |
| N | -0.10289 | -0.51684 | 0.02811  |
| H | -0.70573 | -3.24305 | 0.98822  |
| H | -2.28470 | -2.53926 | 1.35270  |
| C | 0.51449  | -1.41261 | 2.29039  |
| H | 1.09539  | -0.51309 | 2.53082  |
| H | 0.08976  | -1.78438 | 3.22994  |
| H | 1.18371  | -2.18764 | 1.90621  |
| C | -1.58009 | -0.10543 | 1.98778  |
| H | -1.92326 | -0.53171 | 2.93802  |
| H | -1.06832 | 0.83633  | 2.22331  |
| H | -2.46704 | 0.10611  | 1.37641  |
| C | -1.22893 | -3.42744 | -1.50537 |
| H | -1.89684 | -4.24525 | -1.20780 |
| H | -1.36231 | -3.25716 | -2.58098 |
| H | -0.19578 | -3.75524 | -1.33188 |
| C | -2.97588 | -1.67377 | -1.04438 |
| H | -3.06213 | -1.44790 | -2.11520 |
| H | -3.70030 | -2.46447 | -0.81026 |
| H | -3.25641 | -0.77505 | -0.47607 |
| C | 0.82829  | 0.58801  | -0.03771 |
| C | 0.32428  | 1.89805  | -0.13871 |
| C | 2.20385  | 0.29128  | -0.03730 |
| C | 1.26037  | 2.93836  | -0.15815 |
| C | 3.09034  | 1.37281  | -0.05694 |
| C | 2.62575  | 2.68296  | -0.09775 |
| H | 0.90616  | 3.96684  | -0.23931 |
| H | 4.16377  | 1.17807  | -0.06003 |
| H | 3.33530  | 3.51193  | -0.10956 |
| C | 2.74444  | -1.12215 | -0.13399 |
| H | 1.91867  | -1.82488 | 0.03113  |
| C | -1.14671 | 2.20754  | -0.33274 |
| H | -1.72643 | 1.30238  | -0.12151 |
| C | 3.81802  | -1.41212 | 0.90739  |
| H | 3.47121  | -1.19903 | 1.92654  |
| H | 4.11516  | -2.46805 | 0.86720  |
| H | 4.72314  | -0.81541 | 0.73160  |
| C | 3.25997  | -1.38010 | -1.54915 |
| H | 2.47994  | -1.21153 | -2.30334 |
| H | 4.10504  | -0.72053 | -1.79100 |
| H | 3.60686  | -2.41690 | -1.65149 |
| C | -1.64716 | 3.29823  | 0.60577  |
| H | -2.72675 | 3.44602  | 0.47717  |
| H | -1.46743 | 3.04697  | 1.65906  |
| H | -1.16231 | 4.26316  | 0.40510  |
| C | -1.41386 | 2.56890  | -1.79302 |
| H | -0.89156 | 3.49259  | -2.07938 |
| H | -1.08344 | 1.77509  | -2.47606 |
| H | -2.48814 | 2.72702  | -1.95836 |

|   |          |          |          |
|---|----------|----------|----------|
| C | -0.61427 | -1.08138 | -1.00444 |
| H | -0.35837 | -0.73530 | -2.00854 |
| F | -4.41870 | 0.95764  | 0.47250  |

**2Ba:**  $\Delta G = -2718719.8$  kJ/mol

|   |          |          |          |
|---|----------|----------|----------|
| C | 0.23700  | -1.23119 | -1.82469 |
| C | 1.43796  | -2.14857 | -1.54074 |
| C | 2.17191  | -1.58122 | -0.30502 |
| N | 0.12058  | -0.50540 | -0.47573 |
| H | 1.07847  | -3.16092 | -1.31851 |
| H | 2.09673  | -2.22052 | -2.41321 |
| C | -1.03850 | -1.98920 | -2.13634 |
| H | -1.90533 | -1.31939 | -2.20073 |
| H | -0.92083 | -2.46288 | -3.11780 |
| H | -1.24236 | -2.78319 | -1.41247 |
| C | 0.49786  | -0.20511 | -2.91812 |
| H | 0.51803  | -0.73066 | -3.87962 |
| H | -0.30391 | 0.54215  | -2.97099 |
| H | 1.45819  | 0.30662  | -2.80152 |
| C | 2.59010  | -2.65953 | 0.69120  |
| H | 3.30695  | -3.34268 | 0.21898  |
| H | 3.07203  | -2.21924 | 1.57345  |
| H | 1.72939  | -3.25144 | 1.02798  |
| C | 3.37606  | -0.70129 | -0.67524 |
| H | 3.81948  | -0.23530 | 0.21250  |
| H | 4.14278  | -1.32653 | -1.14959 |
| H | 3.10315  | 0.09328  | -1.37986 |
| C | -0.96693 | 0.38956  | -0.14866 |
| C | -0.79919 | 1.76469  | -0.40078 |
| C | -2.12774 | -0.14616 | 0.43734  |
| C | -1.88580 | 2.60085  | -0.12231 |
| C | -3.18053 | 0.73879  | 0.69431  |
| C | -3.07075 | 2.09320  | 0.39973  |
| H | -1.78985 | 3.67250  | -0.30196 |
| H | -4.09346 | 0.35663  | 1.15351  |
| H | -3.90609 | 2.76443  | 0.60564  |
| C | -2.23569 | -1.58729 | 0.89588  |
| H | -1.35890 | -2.13600 | 0.52987  |
| C | 0.52119  | 2.36761  | -0.83873 |
| H | 1.17673  | 1.55944  | -1.18115 |
| C | -3.48469 | -2.27907 | 0.36261  |
| H | -3.55806 | -2.21804 | -0.73039 |
| H | -3.48219 | -3.34113 | 0.64028  |
| H | -4.39867 | -1.83780 | 0.78264  |
| C | -2.18382 | -1.64970 | 2.42156  |
| H | -1.27008 | -1.18856 | 2.81670  |
| H | -3.04125 | -1.12913 | 2.87039  |
| H | -2.21025 | -2.69192 | 2.76630  |
| C | 0.37309  | 3.35037  | -1.99255 |
| H | 1.35998  | 3.69473  | -2.32811 |

|   |          |          |          |
|---|----------|----------|----------|
| H | -0.13358 | 2.89770  | -2.85469 |
| H | -0.19626 | 4.24290  | -1.70066 |
| C | 1.21285  | 3.01042  | 0.36251  |
| H | 0.63308  | 3.86103  | 0.74745  |
| H | 1.33937  | 2.29556  | 1.18576  |
| H | 2.20699  | 3.38407  | 0.08219  |
| C | 1.13695  | -0.69464 | 0.28798  |
| H | 1.19845  | -0.21052 | 1.28034  |
| F | 1.26855  | 0.47695  | 3.03687  |
| H | 2.48971  | 0.82744  | 2.87516  |
| F | 3.48139  | 1.09972  | 2.71897  |

**2Bb:**  $\Delta G = -2718721.3$  kJ/mol

|   |          |          |          |
|---|----------|----------|----------|
| C | -0.69448 | -0.84762 | 1.27655  |
| C | -1.79663 | -1.74630 | 0.69002  |
| C | -1.41402 | -2.06726 | -0.77183 |
| N | 0.01062  | -0.38782 | -0.01158 |
| H | -1.91948 | -2.65664 | 1.28659  |
| H | -2.75217 | -1.20924 | 0.70604  |
| C | 0.30878  | -1.59453 | 2.14226  |
| H | 1.17160  | -0.96619 | 2.39656  |
| H | -0.18832 | -1.86146 | 3.08169  |
| H | 0.66218  | -2.52166 | 1.68042  |
| C | -1.24205 | 0.34655  | 2.03436  |
| H | -1.70554 | -0.02428 | 2.95607  |
| H | -0.44691 | 1.04386  | 2.32760  |
| H | -2.01276 | 0.87969  | 1.46944  |
| C | -0.72098 | -3.43151 | -0.92405 |
| H | -1.45091 | -4.22274 | -0.71289 |
| H | -0.34631 | -3.58071 | -1.94456 |
| H | 0.11698  | -3.54904 | -0.22659 |
| C | -2.59418 | -1.96691 | -1.73417 |
| H | -2.28162 | -2.14991 | -2.76996 |
| H | -3.34265 | -2.72444 | -1.47018 |
| H | -3.07510 | -0.98326 | -1.67979 |
| C | 1.10533  | 0.55888  | -0.01775 |
| C | 0.81079  | 1.93132  | -0.10381 |
| C | 2.42078  | 0.05853  | 0.03790  |
| C | 1.88745  | 2.82202  | -0.04396 |
| C | 3.45632  | 0.99788  | 0.09538  |
| C | 3.19479  | 2.36347  | 0.07589  |
| H | 1.69212  | 3.89326  | -0.11309 |
| H | 4.48776  | 0.64558  | 0.13870  |
| H | 4.01988  | 3.07584  | 0.12629  |
| C | 2.75590  | -1.41635 | -0.06889 |
| H | 1.83496  | -1.99551 | 0.05973  |
| C | -0.58389 | 2.44910  | -0.38295 |
| H | -1.29602 | 1.62709  | -0.25897 |
| C | 3.73653  | -1.87973 | 1.00087  |
| H | 3.37990  | -1.64891 | 2.01273  |

|   |          |          |          |
|---|----------|----------|----------|
| H | 3.88360  | -2.96575 | 0.93790  |
| H | 4.72331  | -1.41347 | 0.87945  |
| C | 3.27729  | -1.72642 | -1.47138 |
| H | 2.56135  | -1.42619 | -2.24792 |
| H | 4.22194  | -1.20130 | -1.67019 |
| H | 3.46455  | -2.80254 | -1.58531 |
| C | -1.00406 | 3.56881  | 0.55965  |
| H | -2.04842 | 3.85115  | 0.37303  |
| H | -0.92111 | 3.27215  | 1.61303  |
| H | -0.39441 | 4.47180  | 0.41841  |
| C | -0.68543 | 2.88679  | -1.84348 |
| H | -0.01063 | 3.72735  | -2.05877 |
| H | -0.42860 | 2.06857  | -2.52983 |
| H | -1.70816 | 3.21090  | -2.07795 |
| C | -0.38942 | -1.02951 | -1.04914 |
| H | 0.05348  | -0.82777 | -2.02751 |
| F | -3.64182 | 1.20109  | -0.47343 |
| H | -4.26625 | 0.52145  | 0.21342  |
| F | -4.88323 | -0.14621 | 0.89217  |

**2Bc:**  $\Delta G = -2718719.5$  kJ/mol

|   |          |          |          |
|---|----------|----------|----------|
| C | -0.64519 | 0.72701  | 1.95528  |
| C | -2.17360 | 0.86556  | 1.86269  |
| C | -2.54638 | 0.90459  | 0.36439  |
| N | -0.31833 | 0.27084  | 0.52597  |
| H | -2.64889 | -0.00377 | 2.33352  |
| H | -2.52404 | 1.75629  | 2.39566  |
| C | -0.19953 | -0.32194 | 2.95496  |
| H | 0.88451  | -0.48807 | 2.91684  |
| H | -0.43814 | 0.04196  | 3.96103  |
| H | -0.72032 | -1.27410 | 2.81856  |
| C | 0.07017  | 2.03986  | 2.23501  |
| H | -0.11807 | 2.31622  | 3.27878  |
| H | 1.15621  | 1.94146  | 2.11464  |
| H | -0.28831 | 2.86064  | 1.60652  |
| C | -3.76994 | 0.05552  | 0.03371  |
| H | -4.64324 | 0.44696  | 0.57011  |
| H | -3.99403 | 0.07896  | -1.03975 |
| H | -3.62829 | -0.99001 | 0.33446  |
| C | -2.73336 | 2.33409  | -0.17003 |
| H | -2.87924 | 2.33734  | -1.25776 |
| H | -3.62561 | 2.77462  | 0.29226  |
| H | -1.87656 | 2.97755  | 0.06444  |
| C | 1.01561  | -0.10795 | 0.11620  |
| C | 1.85317  | 0.88434  | -0.42938 |
| C | 1.41570  | -1.44759 | 0.26755  |
| C | 3.16505  | 0.51114  | -0.74101 |
| C | 2.73983  | -1.76077 | -0.05878 |
| C | 3.61248  | -0.78961 | -0.53660 |
| H | 3.84024  | 1.25410  | -1.16749 |

|   |          |          |          |
|---|----------|----------|----------|
| H | 3.08073  | -2.79193 | 0.04500  |
| H | 4.64236  | -1.05517 | -0.78074 |
| C | 0.45593  | -2.56215 | 0.63407  |
| H | -0.50135 | -2.11501 | 0.93171  |
| C | 1.36222  | 2.27336  | -0.78844 |
| H | 0.39187  | 2.43610  | -0.30660 |
| C | 0.95855  | -3.42152 | 1.78783  |
| H | 1.19663  | -2.82615 | 2.67796  |
| H | 0.19941  | -4.16186 | 2.07205  |
| H | 1.86293  | -3.97881 | 1.50854  |
| C | 0.18028  | -3.41488 | -0.60403 |
| H | -0.17015 | -2.80584 | -1.44579 |
| H | 1.08778  | -3.94322 | -0.92829 |
| H | -0.58709 | -4.17094 | -0.39154 |
| C | 2.29757  | 3.37758  | -0.31301 |
| H | 1.85570  | 4.36228  | -0.51330 |
| H | 2.49600  | 3.31370  | 0.76458  |
| H | 3.26411  | 3.34744  | -0.83342 |
| C | 1.12155  | 2.35862  | -2.29507 |
| H | 2.05688  | 2.22315  | -2.85576 |
| H | 0.41626  | 1.59042  | -2.63695 |
| H | 0.70911  | 3.33970  | -2.56646 |
| C | -1.31854 | 0.36350  | -0.27638 |
| H | -1.22456 | 0.08293  | -1.34265 |
| F | -2.73345 | -2.31592 | -2.43008 |
| H | -2.08413 | -1.56593 | -2.72913 |
| F | -1.28097 | -0.61957 | -3.07733 |

**2Bd:**  $\Delta G = -2718717.8$  kJ/mol

|   |          |          |          |
|---|----------|----------|----------|
| C | 0.24855  | 1.22068  | 1.25288  |
| C | 0.56071  | 2.63808  | 0.74442  |
| C | 0.61899  | 2.57998  | -0.79902 |
| N | -0.29601 | 0.57866  | -0.03583 |
| H | -0.24006 | 3.32132  | 1.05297  |
| H | 1.49516  | 3.01385  | 1.17496  |
| C | -0.80006 | 1.18646  | 2.34694  |
| H | -1.10665 | 0.16052  | 2.58709  |
| H | -0.35639 | 1.61282  | 3.25392  |
| H | -1.68306 | 1.78393  | 2.10357  |
| C | 1.48812  | 0.45951  | 1.69545  |
| H | 1.84748  | 0.91217  | 2.62702  |
| H | 1.26606  | -0.59305 | 1.91048  |
| H | 2.30213  | 0.51425  | 0.96522  |
| C | -0.11030 | 3.74673  | -1.46118 |
| H | 0.37924  | 4.68802  | -1.18245 |
| H | -0.08622 | 3.66474  | -2.55492 |
| H | -1.15850 | 3.80350  | -1.14085 |
| C | 2.04851  | 2.45771  | -1.34782 |
| H | 2.04555  | 2.31237  | -2.43554 |
| H | 2.59248  | 3.38633  | -1.13386 |

|   |          |          |          |
|---|----------|----------|----------|
| H | 2.60030  | 1.62670  | -0.89065 |
| C | -0.94292 | -0.71452 | -0.07589 |
| C | -0.16406 | -1.85748 | -0.33534 |
| C | -2.33779 | -0.75883 | 0.10389  |
| C | -0.82505 | -3.09099 | -0.32778 |
| C | -2.94157 | -2.02047 | 0.10169  |
| C | -2.19278 | -3.17598 | -0.09265 |
| H | -0.25444 | -3.99842 | -0.52948 |
| H | -4.02203 | -2.09112 | 0.23496  |
| H | -2.68416 | -4.15026 | -0.08779 |
| C | -3.20338 | 0.48412  | 0.17865  |
| H | -2.55268 | 1.35958  | 0.29401  |
| C | 1.29962  | -1.79109 | -0.72376 |
| H | 1.67429  | -0.78582 | -0.50282 |
| C | -4.16411 | 0.45858  | 1.36087  |
| H | -3.64167 | 0.29744  | 2.31242  |
| H | -4.70822 | 1.40920  | 1.43268  |
| H | -4.91493 | -0.33580 | 1.25430  |
| C | -3.95208 | 0.66875  | -1.14056 |
| H | -3.26365 | 0.72479  | -1.99418 |
| H | -4.64444 | -0.16449 | -1.32503 |
| H | -4.54216 | 1.59463  | -1.12432 |
| C | 2.16017  | -2.78029 | 0.05169  |
| H | 3.21751  | -2.65326 | -0.21081 |
| H | 2.06535  | -2.64492 | 1.13659  |
| H | 1.89380  | -3.82037 | -0.17958 |
| C | 1.44712  | -1.99280 | -2.23126 |
| H | 1.11876  | -2.99678 | -2.53478 |
| H | 0.85508  | -1.26361 | -2.80016 |
| H | 2.49725  | -1.87974 | -2.53288 |
| C | -0.07842 | 1.29908  | -1.07510 |
| H | -0.37973 | 0.94760  | -2.06457 |
| F | 4.33917  | 0.05376  | -0.31528 |
| H | 4.50593  | -0.44688 | 0.78401  |
| F | 4.66071  | -0.88303 | 1.75913  |

**2Be:**  $\Delta G = -2718717.2$  kJ/mol

|   |          |          |          |
|---|----------|----------|----------|
| C | -0.06082 | -1.28125 | 1.36494  |
| C | -0.65651 | -2.60078 | 0.84535  |
| C | -1.00804 | -2.40023 | -0.64648 |
| N | 0.28438  | -0.58803 | 0.03596  |
| H | 0.08766  | -3.40077 | 0.94153  |
| H | -1.53193 | -2.89632 | 1.43383  |
| C | 1.18549  | -1.47382 | 2.20640  |
| H | 1.67558  | -0.51896 | 2.43494  |
| H | 0.88267  | -1.91882 | 3.16124  |
| H | 1.90695  | -2.15335 | 1.74367  |
| C | -1.05823 | -0.40981 | 2.11118  |
| H | -1.27158 | -0.88916 | 3.07369  |
| H | -0.63850 | 0.58051  | 2.32823  |



|   |          |          |          |
|---|----------|----------|----------|
| H | -2.00959 | -0.29296 | 1.58160  |
| C | -0.57788 | -3.57394 | -1.52252 |
| H | -1.11497 | -4.47839 | -1.21158 |
| H | -0.80960 | -3.39000 | -2.57905 |
| H | 0.49801  | -3.77154 | -1.43306 |
| C | -2.49134 | -2.07133 | -0.87161 |
| H | -2.68700 | -1.79365 | -1.91504 |
| H | -3.09133 | -2.96046 | -0.64038 |
| H | -2.83381 | -1.25488 | -0.22464 |
| C | 1.01563  | 0.65584  | -0.03144 |
| C | 0.29440  | 1.86438  | -0.05752 |
| C | 2.42003  | 0.59667  | -0.08682 |
| C | 1.04244  | 3.04739  | -0.04144 |
| C | 3.11215  | 1.81165  | -0.07253 |
| C | 2.43249  | 3.02434  | -0.02587 |
| H | 0.51845  | 4.00389  | -0.06265 |
| H | 4.20208  | 1.80237  | -0.11895 |
| H | 2.99172  | 3.96118  | -0.00867 |
| C | 3.17892  | -0.70024 | -0.28761 |
| H | 2.48750  | -1.53756 | -0.13220 |
| C | -1.21127 | 1.93890  | -0.23129 |
| H | -1.63827 | 0.93773  | -0.08899 |
| C | 4.33894  | -0.86383 | 0.68590  |
| H | 4.01583  | -0.77235 | 1.73064  |
| H | 4.80485  | -1.85010 | 0.56333  |
| H | 5.12195  | -0.11364 | 0.51209  |
| C | 3.65340  | -0.79246 | -1.73757 |
| H | 2.81612  | -0.71513 | -2.44382 |
| H | 4.36522  | 0.01047  | -1.97493 |
| H | 4.15867  | -1.75020 | -1.91945 |
| C | -1.88197 | 2.86691  | 0.77321  |
| H | -2.96909 | 2.86452  | 0.62448  |
| H | -1.68577 | 2.56277  | 1.80917  |
| H | -1.54250 | 3.90500  | 0.65887  |
| C | -1.52699 | 2.36154  | -1.66633 |
| H | -1.13497 | 3.36603  | -1.87849 |
| H | -1.08670 | 1.67273  | -2.39939 |
| H | -2.61087 | 2.38524  | -1.83453 |
| C | -0.22898 | -1.18141 | -0.97874 |
| H | -0.10317 | -0.77027 | -1.98313 |
| F | -4.28194 | 0.20215  | 1.18861  |
| H | -4.51490 | 0.45530  | 0.03078  |
| F | -4.72700 | 0.67851  | -1.01153 |

**2Bf:**  $\Delta G = -2718708.3$  kJ/mol

|   |         |          |          |
|---|---------|----------|----------|
| C | 0.54643 | -0.89897 | 1.58712  |
| C | 1.61187 | -1.94466 | 1.22423  |
| C | 1.41794 | -2.30849 | -0.26195 |
| N | 0.14292 | -0.40698 | 0.18947  |
| H | 2.60982 | -1.50960 | 1.36053  |

|   |          |          |          |
|---|----------|----------|----------|
| H | 1.54621  | -2.82322 | 1.87582  |
| C | 1.10022  | 0.24076  | 2.41643  |
| H | 0.33604  | 1.00222  | 2.61417  |
| H | 1.41392  | -0.16359 | 3.38611  |
| H | 1.97531  | 0.70701  | 1.95380  |
| C | -0.67456 | -1.48344 | 2.28428  |
| H | -0.38928 | -1.74481 | 3.30978  |
| H | -1.48992 | -0.75215 | 2.35069  |
| H | -1.04927 | -2.39421 | 1.80761  |
| C | 2.73375  | -2.55841 | -0.98671 |
| H | 3.19462  | -3.46889 | -0.58265 |
| H | 2.57554  | -2.71218 | -2.06114 |
| H | 3.43349  | -1.72877 | -0.85850 |
| C | 0.50841  | -3.53705 | -0.46241 |
| H | 0.28416  | -3.69682 | -1.52472 |
| H | 1.03497  | -4.42543 | -0.09245 |
| H | -0.43954 | -3.46262 | 0.08102  |
| C | -0.85995 | 0.62122  | -0.00785 |
| C | -2.19720 | 0.21242  | -0.20244 |
| C | -0.48527 | 1.97913  | 0.01033  |
| C | -3.17108 | 1.21100  | -0.30557 |
| C | -1.50561 | 2.93272  | -0.08680 |
| C | -2.83591 | 2.55774  | -0.22592 |
| H | -4.21098 | 0.92108  | -0.46148 |
| H | -1.23948 | 3.99091  | -0.07511 |
| H | -3.61419 | 3.31924  | -0.29879 |
| C | 0.95352  | 2.45124  | 0.00808  |
| H | 1.60140  | 1.57160  | 0.08417  |
| C | -2.60804 | -1.23470 | -0.39001 |
| H | -1.77407 | -1.87486 | -0.08775 |
| C | 1.27694  | 3.40432  | 1.15402  |
| H | 1.02653  | 2.99087  | 2.13751  |
| H | 2.34927  | 3.64285  | 1.15588  |
| H | 0.73632  | 4.35509  | 1.04788  |
| C | 1.26949  | 3.12095  | -1.32950 |
| H | 1.01148  | 2.47941  | -2.17939 |
| H | 0.71927  | 4.06662  | -1.43679 |
| H | 2.34102  | 3.35173  | -1.39915 |
| C | -3.80531 | -1.62785 | 0.46634  |
| H | -4.00477 | -2.70315 | 0.36961  |
| H | -3.63608 | -1.41395 | 1.52950  |
| H | -4.71971 | -1.10259 | 0.16040  |
| C | -2.86699 | -1.51601 | -1.86912 |
| H | -3.71550 | -0.92633 | -2.24342 |
| H | -1.99441 | -1.27141 | -2.48907 |
| H | -3.10413 | -2.57684 | -2.02649 |
| C | 0.64337  | -1.13059 | -0.75583 |
| H | 0.35951  | -0.95803 | -1.79193 |
| F | 2.38327  | 0.22167  | -1.92888 |
| H | 3.19823  | 0.51329  | -1.01422 |

|   |         |         |          |
|---|---------|---------|----------|
| F | 3.87468 | 0.74483 | -0.24090 |
|---|---------|---------|----------|

**3Ba:**  $\Delta G = -2982375.4$  kJ/mol

|   |          |          |          |
|---|----------|----------|----------|
| C | -0.00339 | -1.05119 | 1.67018  |
| C | 0.96313  | -2.20481 | 1.35896  |
| C | 0.90086  | -2.47075 | -0.16093 |
| N | -0.21157 | -0.46801 | 0.26214  |
| H | 1.98322  | -1.91222 | 1.63452  |
| H | 0.71093  | -3.09863 | 1.93976  |
| C | 0.59893  | -0.00129 | 2.58034  |
| H | -0.08507 | 0.84227  | 2.73513  |
| H | 0.77491  | -0.46181 | 3.55952  |
| H | 1.56109  | 0.36212  | 2.20866  |
| C | -1.34297 | -1.51000 | 2.22606  |
| H | -1.18352 | -1.83720 | 3.25987  |
| H | -2.07256 | -0.69110 | 2.25353  |
| H | -1.76945 | -2.35472 | 1.67613  |
| C | 2.27570  | -2.72700 | -0.76836 |
| H | 2.70807  | -3.62243 | -0.30467 |
| H | 2.21255  | -2.90464 | -1.84845 |
| H | 2.95912  | -1.88907 | -0.59257 |
| C | -0.05585 | -3.61778 | -0.52925 |
| H | -0.17967 | -3.70239 | -1.61616 |
| H | 0.36804  | -4.56118 | -0.16340 |
| H | -1.04719 | -3.49519 | -0.07752 |
| C | -1.01585 | 0.71266  | 0.02675  |
| C | -2.38587 | 0.53026  | -0.25331 |
| C | -0.41387 | 1.98267  | 0.09048  |
| C | -3.17272 | 1.67957  | -0.37777 |
| C | -1.25500 | 3.09476  | -0.03330 |
| C | -2.62081 | 2.94883  | -0.24302 |
| H | -4.23566 | 1.57259  | -0.59784 |
| H | -0.81801 | 4.09337  | 0.01549  |
| H | -3.25612 | 3.83151  | -0.33240 |
| C | 1.08477  | 2.20144  | 0.16081  |
| H | 1.57674  | 1.22333  | 0.25362  |
| C | -3.00057 | -0.82862 | -0.52669 |
| H | -2.30604 | -1.60233 | -0.18233 |
| C | 1.50264  | 3.07212  | 1.34149  |
| H | 1.13142  | 2.69461  | 2.30101  |
| H | 2.59735  | 3.13004  | 1.40305  |
| H | 1.13092  | 4.09947  | 1.22459  |
| C | 1.56605  | 2.82973  | -1.14768 |
| H | 1.28670  | 2.22834  | -2.02027 |
| H | 1.13814  | 3.83332  | -1.27899 |
| H | 2.65827  | 2.93820  | -1.14523 |
| C | -4.31756 | -1.04622 | 0.20664  |
| H | -4.67387 | -2.07276 | 0.05106  |
| H | -4.21619 | -0.88800 | 1.28798  |
| H | -5.10568 | -0.37400 | -0.15746 |

|   |          |          |          |
|---|----------|----------|----------|
| C | -3.16391 | -1.02419 | -2.03346 |
| H | -3.86825 | -0.29368 | -2.45519 |
| H | -2.20955 | -0.90907 | -2.56428 |
| H | -3.55224 | -2.02753 | -2.25397 |
| C | 0.27761  | -1.21640 | -0.66111 |
| H | 0.16668  | -0.94287 | -1.71150 |
| F | 2.24845  | -0.11123 | -2.65721 |
| H | 3.00142  | 0.08096  | -2.03713 |
| F | 4.06544  | 0.34256  | -1.18974 |
| H | 3.94140  | 0.24108  | 0.18707  |
| F | 3.86669  | 0.17121  | 1.17500  |

**3Bb:**  $\Delta G = -2982364.7$  kJ/mol

|   |          |          |          |
|---|----------|----------|----------|
| C | -0.33501 | -1.06202 | -1.79116 |
| C | -1.25749 | -2.23363 | -1.42256 |
| C | -1.05870 | -2.52480 | 0.07941  |
| N | -0.06478 | -0.46551 | -0.39799 |
| H | -2.30120 | -1.94581 | -1.60074 |
| H | -1.04910 | -3.11153 | -2.04401 |
| C | -0.99721 | -0.05176 | -2.70157 |
| H | -0.33485 | 0.79691  | -2.90862 |
| H | -1.20156 | -0.54371 | -3.65976 |
| H | -1.95178 | 0.30823  | -2.30598 |
| C | 0.99457  | -1.49358 | -2.39479 |
| H | 0.80534  | -1.85255 | -3.41279 |
| H | 1.69411  | -0.65170 | -2.47062 |
| H | 1.47427  | -2.30770 | -1.84369 |
| C | -2.35806 | -2.87084 | 0.79833  |
| H | -2.74028 | -3.82097 | 0.40472  |
| H | -2.19631 | -2.99471 | 1.87612  |
| H | -3.12398 | -2.10452 | 0.65031  |
| C | -0.03126 | -3.64118 | 0.34609  |
| H | 0.19662  | -3.72552 | 1.41620  |
| H | -0.46116 | -4.59513 | 0.01678  |
| H | 0.90912  | -3.49438 | -0.19608 |
| C | 0.78680  | 0.69028  | -0.19275 |
| C | 2.14352  | 0.45470  | 0.11964  |
| C | 0.25478  | 1.98939  | -0.30850 |
| C | 2.98085  | 1.56889  | 0.23647  |
| C | 1.14488  | 3.06293  | -0.19032 |
| C | 2.49566  | 2.85946  | 0.06189  |
| H | 4.03285  | 1.41468  | 0.48018  |
| H | 0.75650  | 4.07890  | -0.27664 |
| H | 3.17029  | 3.71272  | 0.14940  |
| C | -1.22531 | 2.28763  | -0.43296 |
| H | -1.76240 | 1.33495  | -0.50298 |
| C | 2.71571  | -0.91925 | 0.40875  |
| H | 1.98295  | -1.67688 | 0.11349  |
| C | -1.56239 | 3.13602  | -1.65540 |
| H | -1.19006 | 2.70752  | -2.59238 |

|   |          |          |          |
|---|----------|----------|----------|
| H | -2.65069 | 3.25028  | -1.74940 |
| H | -1.13952 | 4.14600  | -1.56303 |
| C | -1.72039 | 2.99234  | 0.83074  |
| H | -1.47836 | 2.43027  | 1.73832  |
| H | -1.27213 | 3.99141  | 0.92361  |
| H | -2.80991 | 3.12437  | 0.79416  |
| C | 3.98943  | -1.20374 | -0.37806 |
| H | 4.31538  | -2.23888 | -0.21190 |
| H | 3.84303  | -1.06824 | -1.45729 |
| H | 4.81634  | -0.55161 | -0.06749 |
| C | 2.94089  | -1.08628 | 1.91043  |
| H | 3.69272  | -0.37568 | 2.28084  |
| H | 2.01795  | -0.92024 | 2.48146  |
| H | 3.30014  | -2.09904 | 2.13710  |
| C | -0.44552 | -1.25184 | 0.54919  |
| H | -0.21560 | -1.01092 | 1.58739  |
| F | -3.82757 | 0.26398  | 0.07871  |
| H | -3.24509 | 0.18309  | 0.87104  |
| F | -2.43670 | -0.00069 | 2.00633  |
| H | -1.32050 | 0.42048  | 2.72580  |
| F | -0.49621 | 0.65140  | 3.22220  |

**3Bc:**  $\Delta G = -2982378.6$  kJ/mol

|   |          |          |          |
|---|----------|----------|----------|
| C | -0.62455 | -1.95003 | 1.30474  |
| C | -1.89613 | -2.48817 | 0.62730  |
| C | -2.43301 | -1.37665 | -0.30384 |
| N | -0.29268 | -0.77440 | 0.37323  |
| H | -1.64386 | -3.37350 | 0.03074  |
| H | -2.63997 | -2.79636 | 1.37002  |
| C | 0.51523  | -2.95022 | 1.33074  |
| H | 1.44935  | -2.49512 | 1.68375  |
| H | 0.25318  | -3.74512 | 2.03838  |
| H | 0.68327  | -3.42151 | 0.35836  |
| C | -0.86323 | -1.41194 | 2.70845  |
| H | -1.03901 | -2.26452 | 3.37419  |
| H | 0.01363  | -0.87443 | 3.09104  |
| H | -1.73936 | -0.75904 | 2.76951  |
| C | -2.85824 | -1.89896 | -1.67434 |
| H | -3.68898 | -2.60605 | -1.55898 |
| H | -3.19639 | -1.08165 | -2.32405 |
| H | -2.03548 | -2.42190 | -2.17850 |
| C | -3.56660 | -0.55746 | 0.33030  |
| H | -3.86020 | 0.28333  | -0.30913 |
| H | -4.44295 | -1.20411 | 0.46214  |
| H | -3.28810 | -0.16079 | 1.31364  |
| C | 0.93336  | -0.01503 | 0.46864  |
| C | 0.94232  | 1.14874  | 1.25984  |
| C | 2.05114  | -0.45693 | -0.26029 |
| C | 2.16073  | 1.82508  | 1.38251  |
| C | 3.24058  | 0.26222  | -0.10218 |

|   |          |          |          |
|---|----------|----------|----------|
| C | 3.30272  | 1.37633  | 0.72759  |
| H | 2.20539  | 2.73338  | 1.98457  |
| H | 4.12622  | -0.04880 | -0.65817 |
| H | 4.24217  | 1.92010  | 0.83897  |
| C | 1.97608  | -1.57440 | -1.28204 |
| H | 1.02286  | -2.10151 | -1.15302 |
| C | -0.32106 | 1.74699  | 1.84594  |
| H | -1.10171 | 0.97867  | 1.84827  |
| C | 3.09768  | -2.59279 | -1.12559 |
| H | 3.14039  | -3.00469 | -0.10911 |
| H | 2.95456  | -3.42980 | -1.82108 |
| H | 4.07878  | -2.15272 | -1.34885 |
| C | 1.95497  | -0.97823 | -2.68896 |
| H | 1.11364  | -0.28668 | -2.82235 |
| H | 2.87932  | -0.42264 | -2.90017 |
| H | 1.86195  | -1.77123 | -3.44289 |
| C | -0.15248 | 2.22081  | 3.28252  |
| H | -1.11358 | 2.56728  | 3.68378  |
| H | 0.21277  | 1.41884  | 3.93711  |
| H | 0.54875  | 3.06233  | 3.35940  |
| C | -0.81633 | 2.86891  | 0.93357  |
| H | -0.09837 | 3.70017  | 0.89865  |
| H | -0.96210 | 2.51726  | -0.09565 |
| H | -1.77418 | 3.26737  | 1.29428  |
| C | -1.24857 | -0.49002 | -0.43589 |
| H | -1.15751 | 0.34846  | -1.14163 |
| F | -3.03443 | 2.63349  | -2.02832 |
| H | -2.16371 | 2.24671  | -2.29033 |
| F | -0.94633 | 1.65394  | -2.65061 |
| H | 0.28486  | 2.24343  | -2.29103 |
| F | 1.15357  | 2.63547  | -2.04091 |

**3Be'**:  $\Delta G = -2982374.2$  kJ/mol

|   |          |          |         |
|---|----------|----------|---------|
| C | -0.00640 | 0.22123  | 2.31758 |
| C | -1.42323 | -0.25774 | 2.67175 |
| C | -2.26340 | -0.21875 | 1.37654 |
| N | -0.02924 | 0.05107  | 0.79003 |
| H | -1.37742 | -1.28873 | 3.04339 |
| H | -1.86328 | 0.35629  | 3.46506 |
| C | 1.08380  | -0.63848 | 2.92466 |
| H | 2.07981  | -0.34308 | 2.57165 |
| H | 1.06672  | -0.49270 | 4.01082 |
| H | 0.92758  | -1.70417 | 2.73355 |
| C | 0.24707  | 1.68428  | 2.65208 |
| H | 0.34327  | 1.77169  | 3.74032 |
| H | 1.18585  | 2.04390  | 2.21243 |
| H | -0.57099 | 2.34074  | 2.34005 |
| C | -3.17149 | -1.43402 | 1.21753 |
| H | -3.90114 | -1.45375 | 2.03650 |
| H | -3.72680 | -1.39573 | 0.27200 |

|   |          |          |          |
|---|----------|----------|----------|
| H | -2.60204 | -2.37091 | 1.24917  |
| C | -3.08403 | 1.07442  | 1.23672  |
| H | -3.58467 | 1.12939  | 0.26285  |
| H | -3.85648 | 1.08734  | 2.01572  |
| H | -2.46648 | 1.97224  | 1.35813  |
| C | 1.13762  | 0.27299  | -0.03527 |
| C | 1.33003  | 1.55964  | -0.57598 |
| C | 2.02208  | -0.79514 | -0.26828 |
| C | 2.50664  | 1.77848  | -1.29955 |
| C | 3.18460  | -0.51415 | -0.99518 |
| C | 3.43658  | 0.76128  | -1.48709 |
| H | 2.68535  | 2.76168  | -1.73650 |
| H | 3.89114  | -1.32096 | -1.19550 |
| H | 4.35157  | 0.95760  | -2.04843 |
| C | 1.71148  | -2.23026 | 0.10781  |
| H | 0.79562  | -2.24319 | 0.71333  |
| C | 0.27519  | 2.64608  | -0.50627 |
| H | -0.45052 | 2.37880  | 0.26916  |
| C | 2.82657  | -2.88781 | 0.91236  |
| H | 3.08645  | -2.31759 | 1.81234  |
| H | 2.52691  | -3.89570 | 1.22780  |
| H | 3.74018  | -2.99614 | 0.31220  |
| C | 1.41638  | -3.02853 | -1.16194 |
| H | 0.63882  | -2.55199 | -1.77001 |
| H | 2.31667  | -3.12258 | -1.78508 |
| H | 1.07737  | -4.04264 | -0.91265 |
| C | 0.84238  | 4.01035  | -0.13940 |
| H | 0.03076  | 4.74012  | -0.02282 |
| H | 1.40264  | 3.98079  | 0.80407  |
| H | 1.51441  | 4.39894  | -0.91598 |
| C | -0.49289 | 2.69177  | -1.82656 |
| H | 0.16048  | 2.99405  | -2.65682 |
| H | -0.91699 | 1.71198  | -2.08076 |
| H | -1.31883 | 3.41348  | -1.77054 |
| C | -1.20687 | -0.18190 | 0.33128  |
| H | -1.36867 | -0.30082 | -0.74831 |
| F | -2.05957 | -3.06269 | -1.75725 |
| H | -1.84061 | -2.18928 | -2.16268 |
| F | -1.53476 | -0.92970 | -2.70923 |
| H | -2.65588 | -0.08702 | -2.70302 |
| F | -3.44442 | 0.50772  | -2.66556 |

**3Bd:**  $\Delta G = -2982371.7$  kJ/mol

|   |          |         |          |
|---|----------|---------|----------|
| C | -0.15021 | 1.13398 | 1.17100  |
| C | -0.59868 | 2.49827 | 0.61933  |
| C | 0.18240  | 2.75478 | -0.68933 |
| N | 0.51489  | 0.53184 | -0.07947 |
| H | -1.67359 | 2.46855 | 0.40309  |
| H | -0.43514 | 3.29368 | 1.35439  |
| C | -1.30572 | 0.26741 | 1.63116  |

|   |          |          |          |
|---|----------|----------|----------|
| H | -0.98158 | -0.74914 | 1.88797  |
| H | -1.72029 | 0.71649  | 2.54101  |
| H | -2.11274 | 0.21934  | 0.89553  |
| C | 0.89063  | 1.23410  | 2.27560  |
| H | 0.39130  | 1.59951  | 3.18001  |
| H | 1.32140  | 0.25376  | 2.51469  |
| H | 1.69703  | 1.93442  | 2.03764  |
| C | -0.69386 | 3.30881  | -1.80932 |
| H | -1.10434 | 4.27942  | -1.50503 |
| H | -0.11643 | 3.46013  | -2.72985 |
| H | -1.53454 | 2.64096  | -2.03254 |
| C | 1.41842  | 3.64559  | -0.48633 |
| H | 2.01922  | 3.71059  | -1.40212 |
| H | 1.08770  | 4.65863  | -0.22590 |
| H | 2.06141  | 3.27942  | 0.32305  |
| C | 1.01313  | -0.82462 | -0.14351 |
| C | 2.36535  | -1.05771 | 0.17120  |
| C | 0.13406  | -1.84180 | -0.55556 |
| C | 2.80382  | -2.38616 | 0.14375  |
| C | 0.62934  | -3.14981 | -0.56426 |
| C | 1.94311  | -3.42329 | -0.19950 |
| H | 3.84638  | -2.60401 | 0.37942  |
| H | -0.02661 | -3.96195 | -0.88161 |
| H | 2.30787  | -4.45165 | -0.20916 |
| C | -1.25509 | -1.55647 | -1.08600 |
| H | -1.49591 | -0.50773 | -0.88253 |
| C | 3.36213  | 0.05711  | 0.42101  |
| H | 2.81069  | 0.99132  | 0.57445  |
| C | -2.32524 | -2.41740 | -0.42687 |
| H | -2.27678 | -2.36621 | 0.66754  |
| H | -3.32547 | -2.08785 | -0.73590 |
| H | -2.22710 | -3.47307 | -0.71459 |
| C | -1.27340 | -1.71440 | -2.60543 |
| H | -0.53944 | -1.05705 | -3.09057 |
| H | -1.04486 | -2.74733 | -2.90326 |
| H | -2.26446 | -1.46384 | -3.00674 |
| C | 4.21219  | -0.17739 | 1.66295  |
| H | 4.85897  | 0.68931  | 1.85109  |
| H | 3.59648  | -0.33565 | 2.55756  |
| H | 4.86839  | -1.05063 | 1.54999  |
| C | 4.23194  | 0.25906  | -0.81890 |
| H | 4.83912  | -0.63234 | -1.02955 |
| H | 3.62663  | 0.46616  | -1.71144 |
| H | 4.91908  | 1.10377  | -0.67622 |
| C | 0.67314  | 1.39311  | -1.01751 |
| H | 1.16885  | 1.11064  | -1.94935 |
| F | -4.26532 | -1.17853 | 2.45808  |
| H | -4.51131 | -0.60957 | 1.68447  |
| F | -4.89450 | 0.19514  | 0.61595  |
| H | -4.13868 | 0.57408  | -0.48015 |



F -3.62242 0.86184 -1.27847

**Method M06-2X/def2-TZVP**

1A:  $\Delta G = -2456241.1$  kJ/mol

|   |          |          |          |
|---|----------|----------|----------|
| C | 1.11587  | 0.49390  | 1.46002  |
| C | 2.46730  | 1.08116  | 1.01911  |
| C | 2.71704  | 0.63291  | -0.43053 |
| N | 0.47877  | 0.21573  | 0.13859  |
| H | 2.40885  | 2.18087  | 1.04605  |
| H | 3.28417  | 0.78794  | 1.69574  |
| C | 0.32353  | 1.49418  | 2.29381  |
| H | -0.68438 | 1.11541  | 2.52310  |
| H | 0.83054  | 1.66501  | 3.25493  |
| H | 0.22472  | 2.46796  | 1.79623  |
| C | 1.25906  | -0.78387 | 2.28607  |
| H | 1.65882  | -0.54704 | 3.28277  |
| H | 0.28010  | -1.26516 | 2.43514  |
| H | 1.93380  | -1.52001 | 1.83064  |
| C | 3.55388  | 1.64153  | -1.20393 |
| H | 4.57043  | 1.69063  | -0.78579 |
| H | 3.64860  | 1.35794  | -2.26311 |
| H | 3.12554  | 2.65093  | -1.16410 |
| C | 3.40093  | -0.73025 | -0.51084 |
| H | 3.50659  | -1.05822 | -1.55642 |
| H | 4.41035  | -0.67790 | -0.07718 |
| H | 2.85876  | -1.51901 | 0.02592  |
| C | -0.85032 | -0.28823 | -0.00507 |
| C | -1.06361 | -1.68790 | -0.10690 |
| C | -1.95685 | 0.59763  | -0.06802 |
| C | -2.37310 | -2.17372 | -0.20370 |
| C | -3.24894 | 0.06179  | -0.15700 |
| C | -3.46354 | -1.31064 | -0.21063 |
| H | -2.53650 | -3.25252 | -0.28533 |
| H | -4.10413 | 0.74275  | -0.20401 |
| H | -4.48008 | -1.70703 | -0.27946 |
| C | -1.80659 | 2.10441  | -0.13634 |
| H | -0.74533 | 2.33618  | 0.01706  |
| C | 0.08040  | -2.67533 | -0.19846 |
| H | 0.99887  | -2.12758 | 0.04480  |
| C | -2.62437 | 2.83289  | 0.92265  |
| H | -2.40198 | 2.48110  | 1.94026  |
| H | -2.42054 | 3.91402  | 0.89532  |
| H | -3.70679 | 2.70922  | 0.76213  |
| C | -2.17505 | 2.60491  | -1.53076 |
| H | -1.58226 | 2.10841  | -2.31139 |
| H | -3.23933 | 2.42936  | -1.75513 |
| H | -1.99770 | 3.68786  | -1.61837 |
| C | -0.04873 | -3.83165 | 0.78381  |
| H | 0.84655  | -4.47066 | 0.75205  |
| H | -0.16999 | -3.48351 | 1.82008  |

|   |          |          |          |
|---|----------|----------|----------|
| H | -0.90972 | -4.47708 | 0.55042  |
| C | 0.22890  | -3.19174 | -1.62715 |
| H | -0.65475 | -3.77051 | -1.94045 |
| H | 0.35750  | -2.37179 | -2.34937 |
| H | 1.10349  | -3.85418 | -1.71782 |
| C | 1.28156  | 0.52034  | -0.95797 |
| H | 1.15700  | -0.18823 | -1.79512 |
| F | 0.90813  | 1.78897  | -1.56099 |

**1Ba:**  $\Delta G = -2456208.7$  kJ/mol

|   |          |          |          |
|---|----------|----------|----------|
| C | -1.30907 | -0.17973 | 1.59958  |
| C | -2.71333 | -0.57651 | 1.12165  |
| C | -2.79599 | -0.25230 | -0.38565 |
| N | -0.58151 | -0.09005 | 0.25340  |
| H | -2.85886 | -1.65625 | 1.27284  |
| H | -3.49198 | -0.06249 | 1.70140  |
| C | -0.66593 | -1.22031 | 2.49654  |
| H | 0.38051  | -0.97482 | 2.72888  |
| H | -1.21315 | -1.24274 | 3.44884  |
| H | -0.71055 | -2.23069 | 2.07204  |
| C | -1.26249 | 1.17871  | 2.28216  |
| H | -1.75007 | 1.09593  | 3.26291  |
| H | -0.22789 | 1.50779  | 2.45809  |
| H | -1.79054 | 1.95553  | 1.71432  |
| C | -3.45773 | -1.36543 | -1.19358 |
| H | -4.49768 | -1.50279 | -0.86403 |
| H | -3.47187 | -1.12680 | -2.26647 |
| H | -2.93486 | -2.32454 | -1.06496 |
| C | -3.48377 | 1.08716  | -0.67725 |
| H | -3.42633 | 1.34008  | -1.74573 |
| H | -4.54613 | 1.02381  | -0.40124 |
| H | -3.03534 | 1.91439  | -0.10949 |
| C | 0.85201  | 0.05586  | 0.17161  |
| C | 1.40970  | 1.34768  | 0.13193  |
| C | 1.63686  | -1.11319 | 0.13344  |
| C | 2.80633  | 1.44473  | 0.16994  |
| C | 3.02674  | -0.95724 | 0.17182  |
| C | 3.60638  | 0.30769  | 0.21854  |
| H | 3.27217  | 2.43300  | 0.13625  |
| H | 3.66493  | -1.84395 | 0.14101  |
| H | 4.69398  | 0.40768  | 0.25561  |
| C | 1.02623  | -2.47652 | -0.11957 |
| H | -0.03982 | -2.43492 | 0.15046  |
| C | 0.57262  | 2.58522  | -0.11974 |
| H | -0.47763 | 2.34328  | 0.09676  |
| C | 1.66103  | -3.59300 | 0.69314  |
| H | 1.63823  | -3.38379 | 1.77306  |
| H | 1.12817  | -4.54041 | 0.52683  |
| H | 2.71034  | -3.76541 | 0.41054  |
| C | 1.08843  | -2.75448 | -1.62224 |

|   |          |          |          |
|---|----------|----------|----------|
| H | 0.68110  | -1.90822 | -2.20029 |
| H | 2.13072  | -2.90566 | -1.94697 |
| H | 0.52757  | -3.66646 | -1.87819 |
| C | 0.95677  | 3.77081  | 0.75119  |
| H | 0.27449  | 4.61493  | 0.57408  |
| H | 0.91382  | 3.52884  | 1.82356  |
| H | 1.97293  | 4.13256  | 0.53335  |
| C | 0.64860  | 2.92125  | -1.60968 |
| H | 1.66305  | 3.25265  | -1.88492 |
| H | 0.40379  | 2.03973  | -2.22571 |
| H | -0.04448 | 3.73818  | -1.86331 |
| C | -1.36371 | -0.11729 | -0.77383 |
| H | -0.89198 | -0.03646 | -1.83478 |
| F | -0.00157 | 0.03885  | -3.02319 |

**1Bb:**  $\Delta G = -2456186.0$  kJ/mol

|   |          |          |          |
|---|----------|----------|----------|
| C | -0.74958 | -1.00051 | 1.39753  |
| C | -1.56136 | -2.21105 | 0.90257  |
| C | -1.71791 | -2.09558 | -0.63137 |
| N | -0.19288 | -0.47116 | 0.06284  |
| H | -1.02855 | -3.14000 | 1.15133  |
| H | -2.53676 | -2.25547 | 1.40434  |
| C | 0.38531  | -1.38154 | 2.32810  |
| H | 1.04259  | -0.52720 | 2.54602  |
| H | -0.05212 | -1.70399 | 3.28271  |
| H | 0.99027  | -2.21527 | 1.95063  |
| C | -1.61101 | 0.08135  | 2.02607  |
| H | -2.00795 | -0.32013 | 2.96993  |
| H | -1.00344 | 0.96227  | 2.28576  |
| H | -2.46064 | 0.39466  | 1.38185  |
| C | -1.33447 | -3.38457 | -1.35874 |
| H | -2.02272 | -4.18906 | -1.06324 |
| H | -1.40345 | -3.26564 | -2.44914 |
| H | -0.31230 | -3.70700 | -1.11064 |
| C | -3.10799 | -1.61825 | -1.06945 |
| H | -3.14697 | -1.49860 | -2.16296 |
| H | -3.84394 | -2.38951 | -0.79650 |
| H | -3.39052 | -0.65420 | -0.59554 |
| C | 0.82139  | 0.55452  | -0.03185 |
| C | 0.42776  | 1.90340  | -0.12249 |
| C | 2.16959  | 0.14452  | -0.06276 |
| C | 1.44790  | 2.86273  | -0.15832 |
| C | 3.14278  | 1.14905  | -0.10372 |
| C | 2.78869  | 2.49467  | -0.13040 |
| H | 1.17621  | 3.91938  | -0.22837 |
| H | 4.19789  | 0.86546  | -0.13304 |
| H | 3.56632  | 3.26196  | -0.15673 |
| C | 2.58675  | -1.30953 | -0.16786 |
| H | 1.71809  | -1.94066 | 0.07129  |
| C | -1.01206 | 2.32972  | -0.28586 |

|   |          |          |          |
|---|----------|----------|----------|
| H | -1.69774 | 1.49761  | -0.06921 |
| C | 3.69992  | -1.67623 | 0.80301  |
| H | 3.43893  | -1.42758 | 1.84190  |
| H | 3.90821  | -2.75499 | 0.76048  |
| H | 4.64083  | -1.15839 | 0.56411  |
| C | 2.97818  | -1.63030 | -1.60826 |
| H | 2.15820  | -1.41947 | -2.31096 |
| H | 3.84901  | -1.03735 | -1.92821 |
| H | 3.24348  | -2.69266 | -1.71346 |
| C | -1.41171 | 3.45917  | 0.65403  |
| H | -2.50213 | 3.59653  | 0.61419  |
| H | -1.14833 | 3.23991  | 1.69958  |
| H | -0.94397 | 4.42021  | 0.38854  |
| C | -1.28884 | 2.70958  | -1.73866 |
| H | -0.72184 | 3.60103  | -2.05213 |
| H | -1.03199 | 1.89325  | -2.43124 |
| H | -2.35981 | 2.92684  | -1.87030 |
| C | -0.73597 | -1.03459 | -0.95577 |
| H | -0.46190 | -0.72292 | -1.97018 |
| F | -3.77854 | 1.07330  | 0.17494  |

**2A:**  $\Delta G = -2720006.5$  kJ/mol

|   |          |          |          |
|---|----------|----------|----------|
| C | 0.82811  | -0.69500 | 1.49924  |
| C | 2.08713  | -1.46559 | 1.06945  |
| C | 1.87569  | -1.93231 | -0.38122 |
| N | 0.24587  | -0.33487 | 0.16094  |
| H | 2.94884  | -0.78154 | 1.09461  |
| H | 2.31163  | -2.29962 | 1.75032  |
| C | 1.18223  | 0.53114  | 2.32927  |
| H | 0.29511  | 1.15092  | 2.52912  |
| H | 1.57904  | 0.21146  | 3.30364  |
| H | 1.94902  | 1.15262  | 1.84958  |
| C | -0.15467 | -1.54022 | 2.30511  |
| H | 0.25473  | -1.73226 | 3.30695  |
| H | -1.11019 | -1.01078 | 2.44062  |
| H | -0.36594 | -2.51460 | 1.84721  |
| C | 3.18617  | -2.02843 | -1.15040 |
| H | 3.79247  | -2.85375 | -0.74909 |
| H | 3.01333  | -2.23572 | -2.21676 |
| H | 3.78392  | -1.11192 | -1.07594 |
| C | 1.16686  | -3.28474 | -0.47058 |
| H | 0.96606  | -3.55606 | -1.51814 |
| H | 1.80298  | -4.07125 | -0.03991 |
| H | 0.20986  | -3.31217 | 0.06529  |
| C | -0.94485 | 0.44857  | -0.00353 |
| C | -2.19754 | -0.20058 | -0.13788 |
| C | -0.86690 | 1.86261  | -0.05609 |
| C | -3.35262 | 0.58054  | -0.26593 |
| C | -2.05240 | 2.59864  | -0.17838 |
| C | -3.28870 | 1.96955  | -0.27032 |

|   |          |          |          |
|---|----------|----------|----------|
| H | -4.32095 | 0.08345  | -0.37478 |
| H | -1.99636 | 3.69049  | -0.21921 |
| H | -4.20239 | 2.56208  | -0.36528 |
| C | 0.44859  | 2.61061  | -0.07295 |
| H | 1.23984  | 1.88200  | 0.12640  |
| C | -2.33088 | -1.70603 | -0.22870 |
| H | -1.35804 | -2.13754 | 0.03513  |
| C | 0.53334  | 3.70248  | 0.98518  |
| H | 0.31749  | 3.32606  | 1.99537  |
| H | 1.54306  | 4.14038  | 1.00497  |
| H | -0.16917 | 4.52624  | 0.78401  |
| C | 0.72064  | 3.18861  | -1.45898 |
| H | 0.66105  | 2.41920  | -2.24062 |
| H | 0.00370  | 3.98522  | -1.71426 |
| H | 1.73005  | 3.62646  | -1.50307 |
| C | -3.36400 | -2.27012 | 0.73747  |
| H | -3.35918 | -3.37007 | 0.71137  |
| H | -3.17096 | -1.96265 | 1.77564  |
| H | -4.38581 | -1.94924 | 0.48273  |
| C | -2.63709 | -2.13228 | -1.66190 |
| H | -3.61568 | -1.75152 | -1.99508 |
| H | -1.88204 | -1.76292 | -2.37165 |
| H | -2.66515 | -3.22928 | -1.74810 |
| C | 0.93411  | -0.84937 | -0.89878 |
| H | 0.32567  | -1.09640 | -1.77938 |
| F | 1.82751  | 0.25220  | -1.57393 |
| H | 2.91245  | 0.97250  | -0.69851 |
| F | 3.57261  | 1.41733  | -0.17721 |

**2Ba:**  $\Delta G = -2720046.5$  kJ/mol

|   |          |          |          |
|---|----------|----------|----------|
| C | 0.61848  | -0.88233 | -1.93472 |
| C | 1.94409  | -1.60342 | -1.63588 |
| C | 2.45293  | -1.09605 | -0.26961 |
| N | 0.26347  | -0.37416 | -0.53148 |
| H | 1.76516  | -2.68700 | -1.57958 |
| H | 2.67597  | -1.43695 | -2.43746 |
| C | -0.46321 | -1.80987 | -2.45341 |
| H | -1.43688 | -1.30438 | -2.52936 |
| H | -0.18504 | -2.13250 | -3.46581 |
| H | -0.57315 | -2.71354 | -1.84178 |
| C | 0.76523  | 0.30652  | -2.87186 |
| H | 0.95653  | -0.07072 | -3.88525 |
| H | -0.15630 | 0.90529  | -2.91321 |
| H | 1.60246  | 0.96163  | -2.60025 |
| C | 2.98397  | -2.20166 | 0.63740  |
| H | 3.86892  | -2.66908 | 0.18319  |
| H | 3.27612  | -1.79197 | 1.61449  |
| H | 2.23206  | -2.98684 | 0.80293  |
| C | 3.49075  | 0.03029  | -0.38332 |
| H | 3.68663  | 0.47139  | 0.60357  |

|   |          |          |          |
|---|----------|----------|----------|
| H | 4.43053  | -0.37999 | -0.77964 |
| H | 3.15755  | 0.82998  | -1.05952 |
| C | -0.99143 | 0.26250  | -0.20931 |
| C | -1.07167 | 1.66727  | -0.28164 |
| C | -2.06611 | -0.54523 | 0.20697  |
| C | -2.32226 | 2.24699  | -0.03747 |
| C | -3.29132 | 0.08951  | 0.44001  |
| C | -3.42624 | 1.46659  | 0.29251  |
| H | -2.42354 | 3.33406  | -0.08551 |
| H | -4.14669 | -0.50705 | 0.76726  |
| H | -4.39364 | 1.94152  | 0.47309  |
| C | -1.88999 | -2.00871 | 0.55702  |
| H | -0.93858 | -2.35654 | 0.12807  |
| C | 0.15166  | 2.54375  | -0.46253 |
| H | 0.96047  | 1.92962  | -0.88196 |
| C | -2.99542 | -2.89781 | 0.00927  |
| H | -3.10778 | -2.79395 | -1.07989 |
| H | -2.78057 | -3.95492 | 0.22236  |
| H | -3.97033 | -2.67218 | 0.46681  |
| C | -1.75977 | -2.13886 | 2.07445  |
| H | -0.96305 | -1.49103 | 2.47164  |
| H | -2.69751 | -1.85305 | 2.57676  |
| H | -1.53524 | -3.17744 | 2.36004  |
| C | -0.07291 | 3.70652  | -1.41633 |
| H | 0.86502  | 4.25758  | -1.57630 |
| H | -0.43289 | 3.37035  | -2.39992 |
| H | -0.80361 | 4.42941  | -1.02365 |
| C | 0.63269  | 3.02231  | 0.90753  |
| H | -0.10695 | 3.69278  | 1.37353  |
| H | 0.79837  | 2.18342  | 1.59991  |
| H | 1.57536  | 3.58288  | 0.81447  |
| C | 1.22672  | -0.49751 | 0.31275  |
| H | 1.07965  | -0.15709 | 1.36215  |
| F | 0.55857  | 0.32220  | 2.98633  |
| H | 1.82575  | 0.54952  | 2.94352  |
| F | 2.83629  | 0.71681  | 2.81419  |

**2Bb:**  $\Delta G = -2720036.7$  kJ/mol

|   |          |          |          |
|---|----------|----------|----------|
| C | -0.63994 | -0.96257 | 1.26308  |
| C | -1.63718 | -1.98484 | 0.68071  |
| C | -1.50405 | -1.97460 | -0.86107 |
| N | 0.05396  | -0.45752 | -0.01361 |
| H | -1.42960 | -2.98679 | 1.07944  |
| H | -2.65923 | -1.70873 | 0.97210  |
| C | 0.39400  | -1.58382 | 2.18309  |
| H | 1.18217  | -0.86796 | 2.45867  |
| H | -0.11070 | -1.88691 | 3.11023  |
| H | 0.85665  | -2.48144 | 1.75309  |
| C | -1.33439 | 0.19947  | 1.94934  |
| H | -1.76635 | -0.17301 | 2.88860  |

|   |          |          |          |
|---|----------|----------|----------|
| H | -0.63067 | 1.00438  | 2.20781  |
| H | -2.15963 | 0.59426  | 1.34316  |
| C | -1.08882 | -3.32829 | -1.43948 |
| H | -1.88045 | -4.06521 | -1.24449 |
| H | -0.93921 | -3.27288 | -2.52699 |
| H | -0.16053 | -3.70018 | -0.98182 |
| C | -2.76442 | -1.45002 | -1.55706 |
| H | -2.61120 | -1.34970 | -2.64134 |
| H | -3.58527 | -2.16359 | -1.39478 |
| H | -3.07457 | -0.48057 | -1.14063 |
| C | 1.11953  | 0.52163  | -0.01167 |
| C | 0.78035  | 1.88593  | -0.11165 |
| C | 2.45132  | 0.06623  | 0.05140  |
| C | 1.82986  | 2.81045  | -0.05687 |
| C | 3.45705  | 1.03875  | 0.10190  |
| C | 3.15162  | 2.39539  | 0.06887  |
| H | 1.60061  | 3.87649  | -0.13351 |
| H | 4.50131  | 0.71942  | 0.14895  |
| H | 3.95413  | 3.13560  | 0.11363  |
| C | 2.83218  | -1.39734 | -0.05028 |
| H | 1.92505  | -2.00356 | 0.08068  |
| C | -0.63057 | 2.35918  | -0.38267 |
| H | -1.33271 | 1.53881  | -0.19289 |
| C | 3.82715  | -1.82600 | 1.01855  |
| H | 3.46710  | -1.59907 | 2.03233  |
| H | 4.00740  | -2.90929 | 0.96370  |
| H | 4.80252  | -1.33242 | 0.89356  |
| C | 3.36121  | -1.69544 | -1.45107 |
| H | 2.62778  | -1.43612 | -2.22903 |
| H | 4.28129  | -1.12857 | -1.66164 |
| H | 3.59882  | -2.76404 | -1.55883 |
| C | -1.05958 | 3.51348  | 0.51136  |
| H | -2.13052 | 3.71552  | 0.36844  |
| H | -0.90623 | 3.28839  | 1.57718  |
| H | -0.51596 | 4.44391  | 0.28641  |
| C | -0.79336 | 2.71656  | -1.85762 |
| H | -0.16638 | 3.57617  | -2.14301 |
| H | -0.52238 | 1.87636  | -2.51500 |
| H | -1.84080 | 2.97844  | -2.06990 |
| C | -0.41320 | -0.99819 | -1.08045 |
| H | -0.00696 | -0.72394 | -2.06075 |
| F | -3.63505 | 1.39457  | -0.16986 |
| H | -4.07780 | 0.45245  | 0.48985  |
| F | -4.44361 | -0.37227 | 1.06003  |

**2Aa:**  $\Delta G = -2720005.5$  kJ/mol

|   |          |          |         |
|---|----------|----------|---------|
| C | -0.95053 | 0.16572  | 1.79668 |
| C | -2.44842 | -0.11520 | 1.56115 |
| C | -2.72296 | 0.05469  | 0.05597 |
| N | -0.40804 | 0.04936  | 0.39748 |

|   |          |          |          |
|---|----------|----------|----------|
| H | -2.67396 | -1.15253 | 1.85156  |
| H | -3.08584 | 0.53634  | 2.17651  |
| C | -0.32938 | -0.86470 | 2.72922  |
| H | 0.76035  | -0.73115 | 2.80742  |
| H | -0.74514 | -0.74610 | 3.74022  |
| H | -0.53431 | -1.89424 | 2.40730  |
| C | -0.68171 | 1.55287  | 2.37103  |
| H | -0.99607 | 1.58331  | 3.42375  |
| H | 0.39234  | 1.79229  | 2.34548  |
| H | -1.22454 | 2.35019  | 1.84771  |
| C | -3.83225 | -0.85386 | -0.45503 |
| H | -4.80580 | -0.51536 | -0.07144 |
| H | -3.88436 | -0.83361 | -1.55444 |
| H | -3.69046 | -1.89610 | -0.14645 |
| C | -3.07342 | 1.49751  | -0.31254 |
| H | -3.13454 | 1.62558  | -1.40391 |
| H | -4.05438 | 1.76128  | 0.10797  |
| H | -2.35211 | 2.23109  | 0.06857  |
| C | 0.98049  | 0.21553  | 0.06896  |
| C | 1.45125  | 1.49873  | -0.30771 |
| C | 1.86830  | -0.88728 | 0.10462  |
| C | 2.81385  | 1.66558  | -0.58093 |
| C | 3.22380  | -0.66535 | -0.17450 |
| C | 3.70137  | 0.59828  | -0.49970 |
| H | 3.18085  | 2.65266  | -0.87580 |
| H | 3.91451  | -1.51315 | -0.15150 |
| H | 4.76330  | 0.74791  | -0.71139 |
| C | 1.41474  | -2.31480 | 0.33025  |
| H | 0.36386  | -2.28768 | 0.63791  |
| C | 0.52103  | 2.67459  | -0.51587 |
| H | -0.44147 | 2.41145  | -0.06402 |
| C | 2.21442  | -3.03075 | 1.41051  |
| H | 2.20965  | -2.48287 | 2.36413  |
| H | 1.79635  | -4.03031 | 1.60231  |
| H | 3.26649  | -3.17635 | 1.12053  |
| C | 1.46721  | -3.08689 | -0.98616 |
| H | 0.86442  | -2.60225 | -1.76662 |
| H | 2.49887  | -3.17504 | -1.36264 |
| H | 1.07735  | -4.10824 | -0.85633 |
| C | 1.00770  | 3.95380  | 0.14996  |
| H | 0.24845  | 4.74557  | 0.06603  |
| H | 1.21722  | 3.80823  | 1.21999  |
| H | 1.92547  | 4.34291  | -0.31686 |
| C | 0.26718  | 2.89181  | -2.00509 |
| H | 1.19179  | 3.17095  | -2.53499 |
| H | -0.12846 | 1.98616  | -2.48844 |
| H | -0.46233 | 3.70024  | -2.16633 |
| C | -1.35388 | -0.27960 | -0.51492 |
| H | -1.13665 | 0.00925  | -1.55180 |
| F | -1.38725 | -1.87632 | -0.73699 |



|   |          |          |          |
|---|----------|----------|----------|
| H | -1.43127 | -2.03744 | -2.27244 |
| F | -1.42009 | -1.97287 | -3.22187 |

**2Ba'**:  $\Delta G = -2720044.8$  kJ/mol

|   |          |          |          |
|---|----------|----------|----------|
| C | 1.63025  | -0.12724 | -1.60520 |
| C | 2.96886  | -0.47187 | -0.93126 |
| C | 2.82649  | -0.15369 | 0.57285  |
| N | 0.71392  | -0.06262 | -0.37779 |
| H | 3.17806  | -1.54380 | -1.06069 |
| H | 3.79941  | 0.07698  | -1.39477 |
| C | 1.15148  | -1.18892 | -2.57669 |
| H | 0.12874  | -0.99135 | -2.92902 |
| H | 1.80726  | -1.17258 | -3.45755 |
| H | 1.19616  | -2.20088 | -2.15632 |
| C | 1.63688  | 1.22891  | -2.29381 |
| H | 2.26297  | 1.15799  | -3.19328 |
| H | 0.62887  | 1.52581  | -2.61829 |
| H | 2.05681  | 2.02107  | -1.66095 |
| C | 3.39555  | -1.24737 | 1.47377  |
| H | 4.48073  | -1.33265 | 1.32055  |
| H | 3.21865  | -1.01908 | 2.53449  |
| H | 2.94594  | -2.22704 | 1.25585  |
| C | 3.40836  | 1.20884  | 0.96969  |
| H | 3.17161  | 1.45048  | 2.01589  |
| H | 4.50238  | 1.18457  | 0.86576  |
| H | 3.02542  | 2.02245  | 0.33771  |
| C | -0.72508 | 0.01538  | -0.47453 |
| C | -1.34260 | 1.27950  | -0.50090 |
| C | -1.45145 | -1.19104 | -0.50006 |
| C | -2.72980 | 1.30887  | -0.69076 |
| C | -2.83446 | -1.10133 | -0.68789 |
| C | -3.46405 | 0.13417  | -0.81173 |
| H | -3.24356 | 2.27307  | -0.71634 |
| H | -3.43176 | -2.01592 | -0.71214 |
| H | -4.54514 | 0.18092  | -0.96394 |
| C | -0.80691 | -2.52145 | -0.16758 |
| H | 0.27177  | -2.44617 | -0.37157 |
| C | -0.59470 | 2.55608  | -0.17676 |
| H | 0.48089  | 2.36815  | -0.29825 |
| C | -1.34255 | -3.68180 | -0.99041 |
| H | -1.26394 | -3.49102 | -2.07097 |
| H | -0.77707 | -4.59909 | -0.77252 |
| H | -2.39748 | -3.89945 | -0.76646 |
| C | -0.95230 | -2.77771 | 1.33165  |
| H | -0.54563 | -1.95046 | 1.93020  |
| H | -2.01208 | -2.88353 | 1.61318  |
| H | -0.43333 | -3.70320 | 1.62278  |
| C | -0.95832 | 3.71801  | -1.08762 |
| H | -0.33193 | 4.59320  | -0.86266 |
| H | -0.81407 | 3.47008  | -2.14965 |

|   |          |          |          |
|---|----------|----------|----------|
| H | -2.00439 | 4.03440  | -0.95952 |
| C | -0.81425 | 2.90243  | 1.29562  |
| H | -1.87833 | 3.09759  | 1.50385  |
| H | -0.49629 | 2.08510  | 1.95986  |
| H | -0.25031 | 3.80708  | 1.56942  |
| C | 1.35167  | -0.07638 | 0.74124  |
| H | 0.81124  | -0.00509 | 1.72929  |
| F | 0.04363  | 0.14192  | 3.18294  |
| H | -1.23794 | 0.08129  | 2.82397  |
| F | -2.20136 | 0.03687  | 2.52138  |

**2Bc:**  $\Delta G = -2720038.4$  kJ/mol

|   |          |          |          |
|---|----------|----------|----------|
| C | 0.24684  | 1.19275  | 1.33054  |
| C | 0.46515  | 2.63967  | 0.85945  |
| C | 0.52448  | 2.63725  | -0.68479 |
| N | -0.22444 | 0.54130  | 0.01646  |
| H | -0.37489 | 3.26549  | 1.19341  |
| H | 1.37744  | 3.06108  | 1.30116  |
| C | -0.81270 | 1.05857  | 2.40495  |
| H | -1.04582 | 0.00640  | 2.62257  |
| H | -0.41613 | 1.49995  | 3.32918  |
| H | -1.73962 | 1.59176  | 2.16228  |
| C | 1.53010  | 0.51272  | 1.77031  |
| H | 1.86841  | 0.99106  | 2.69996  |
| H | 1.36711  | -0.55162 | 1.99474  |
| H | 2.33636  | 0.59636  | 1.03068  |
| C | -0.36154 | 3.71858  | -1.30446 |
| H | 0.01074  | 4.70890  | -1.00654 |
| H | -0.34716 | 3.66881  | -2.40213 |
| H | -1.40516 | 3.63533  | -0.96824 |
| C | 1.94644  | 2.73068  | -1.25001 |
| H | 1.93044  | 2.68393  | -2.34877 |
| H | 2.37624  | 3.70188  | -0.96541 |
| H | 2.60615  | 1.92700  | -0.88603 |
| C | -0.83944 | -0.76525 | -0.05875 |
| C | -0.03420 | -1.90249 | -0.26169 |
| C | -2.24451 | -0.82609 | 0.04249  |
| C | -0.68260 | -3.14385 | -0.28178 |
| C | -2.83330 | -2.09490 | 0.01216  |
| C | -2.06109 | -3.24364 | -0.12902 |
| H | -0.08882 | -4.04757 | -0.44055 |
| H | -3.92063 | -2.17872 | 0.08265  |
| H | -2.54208 | -4.22458 | -0.14598 |
| C | -3.12430 | 0.40900  | 0.06647  |
| H | -2.49653 | 1.28361  | 0.29295  |
| C | 1.44505  | -1.82314 | -0.56563 |
| H | 1.83048  | -0.83050 | -0.30256 |
| C | -4.21049 | 0.34154  | 1.13057  |
| H | -3.79709 | 0.14064  | 2.12952  |
| H | -4.75798 | 1.29365  | 1.18113  |

|   |          |          |          |
|---|----------|----------|----------|
| H | -4.95167 | -0.44207 | 0.91408  |
| C | -3.71969 | 0.64312  | -1.31980 |
| H | -2.93974 | 0.74548  | -2.08897 |
| H | -4.37225 | -0.19125 | -1.62034 |
| H | -4.32611 | 1.56079  | -1.33441 |
| C | 2.27170  | -2.83331 | 0.21715  |
| H | 3.34125  | -2.63299 | 0.07149  |
| H | 2.07884  | -2.77290 | 1.29872  |
| H | 2.07735  | -3.86958 | -0.09977 |
| C | 1.68161  | -1.97185 | -2.06651 |
| H | 1.38559  | -2.96803 | -2.43233 |
| H | 1.11778  | -1.22549 | -2.64660 |
| H | 2.74802  | -1.82943 | -2.29454 |
| C | -0.03187 | 1.29974  | -1.00266 |
| H | -0.28246 | 0.94643  | -2.00920 |
| F | 3.80115  | 0.23830  | -0.58163 |
| H | 4.14144  | -0.29994 | 0.51871  |
| F | 4.40416  | -0.73913 | 1.42607  |

**2Bd:**  $\Delta G = -2720036.1$  kJ/mol

|   |          |          |          |
|---|----------|----------|----------|
| C | -0.09537 | -1.27478 | 1.41508  |
| C | -0.71251 | -2.59183 | 0.91939  |
| C | -1.12486 | -2.39935 | -0.55745 |
| N | 0.18716  | -0.57651 | 0.07285  |
| H | 0.03238  | -3.39691 | 0.99327  |
| H | -1.56628 | -2.88333 | 1.54493  |
| C | 1.17706  | -1.47237 | 2.21318  |
| H | 1.68914  | -0.52048 | 2.41470  |
| H | 0.90192  | -1.90219 | 3.18577  |
| H | 1.87864  | -2.16827 | 1.73799  |
| C | -1.06204 | -0.39461 | 2.18849  |
| H | -1.27392 | -0.88493 | 3.14894  |
| H | -0.60413 | 0.57877  | 2.42012  |
| H | -2.02131 | -0.22825 | 1.67365  |
| C | -0.63882 | -3.53475 | -1.45877 |
| H | -1.10939 | -4.47655 | -1.14346 |
| H | -0.91066 | -3.35625 | -2.50844 |
| H | 0.45146  | -3.66598 | -1.40145 |
| C | -2.63012 | -2.18560 | -0.74316 |
| H | -2.86985 | -1.93694 | -1.78645 |
| H | -3.14977 | -3.12124 | -0.49090 |
| H | -3.02449 | -1.38155 | -0.10570 |
| C | 0.94292  | 0.64897  | -0.02038 |
| C | 0.25923  | 1.88069  | -0.01043 |
| C | 2.34580  | 0.55047  | -0.11750 |
| C | 1.04616  | 3.03997  | 0.01278  |
| C | 3.07529  | 1.74337  | -0.10043 |
| C | 2.43465  | 2.97555  | -0.00734 |
| H | 0.54951  | 4.01382  | 0.02320  |
| H | 4.16454  | 1.70231  | -0.17998 |

|   |          |          |          |
|---|----------|----------|----------|
| H | 3.02347  | 3.89566  | 0.01556  |
| C | 3.05567  | -0.76537 | -0.36930 |
| H | 2.35657  | -1.58567 | -0.14962 |
| C | -1.24204 | 2.01467  | -0.16157 |
| H | -1.72648 | 1.03055  | -0.07058 |
| C | 4.28535  | -0.95679 | 0.50591  |
| H | 4.05337  | -0.84602 | 1.57497  |
| H | 4.70992  | -1.96025 | 0.35880  |
| H | 5.07907  | -0.23506 | 0.26207  |
| C | 3.40805  | -0.87771 | -1.85100 |
| H | 2.51628  | -0.79782 | -2.49044 |
| H | 4.10712  | -0.08416 | -2.15721 |
| H | 3.88798  | -1.84392 | -2.06562 |
| C | -1.87806 | 2.91075  | 0.89167  |
| H | -2.97062 | 2.90333  | 0.77442  |
| H | -1.65689 | 2.57208  | 1.91422  |
| H | -1.54160 | 3.95541  | 0.80549  |
| C | -1.55278 | 2.53084  | -1.56554 |
| H | -1.14023 | 3.53984  | -1.72317 |
| H | -1.13101 | 1.87561  | -2.34287 |
| H | -2.63840 | 2.56517  | -1.71968 |
| C | -0.40696 | -1.14979 | -0.91108 |
| H | -0.35567 | -0.71675 | -1.91657 |
| F | -3.90452 | 0.27760  | 0.98866  |
| H | -3.95838 | 0.51168  | -0.22120 |
| F | -4.00462 | 0.69240  | -1.26866 |

**3Bb:**  $\Delta G = -2983831.6$  kJ/mol

|   |          |          |          |
|---|----------|----------|----------|
| C | 0.62142  | -0.90599 | 1.74629  |
| C | 1.76961  | -1.84559 | 1.35108  |
| C | 1.59034  | -2.20373 | -0.13669 |
| N | 0.16680  | -0.41986 | 0.36136  |
| H | 2.72500  | -1.31771 | 1.47775  |
| H | 1.79462  | -2.73579 | 1.99376  |
| C | 1.08341  | 0.24897  | 2.60791  |
| H | 0.26546  | 0.95322  | 2.81471  |
| H | 1.41439  | -0.15487 | 3.57456  |
| H | 1.93036  | 0.78552  | 2.16342  |
| C | -0.54719 | -1.60997 | 2.41972  |
| H | -0.23956 | -1.90355 | 3.43221  |
| H | -1.41545 | -0.94300 | 2.52199  |
| H | -0.86181 | -2.52129 | 1.89609  |
| C | 2.91266  | -2.27880 | -0.89013 |
| H | 3.48680  | -3.14169 | -0.52335 |
| H | 2.75237  | -2.41438 | -1.96860 |
| H | 3.50920  | -1.37311 | -0.74191 |
| C | 0.81729  | -3.51576 | -0.35573 |
| H | 0.57983  | -3.66459 | -1.41907 |
| H | 1.44482  | -4.35656 | -0.02864 |
| H | -0.12110 | -3.55899 | 0.21264  |

|   |          |          |          |
|---|----------|----------|----------|
| C | -0.91882 | 0.52240  | 0.18298  |
| C | -2.21418 | 0.00779  | -0.04982 |
| C | -0.66537 | 1.90783  | 0.26000  |
| C | -3.27009 | 0.92334  | -0.12536 |
| C | -1.76305 | 2.77331  | 0.18458  |
| C | -3.05496 | 2.29017  | 0.01305  |
| H | -4.28133 | 0.55133  | -0.30847 |
| H | -1.58880 | 3.85139  | 0.23775  |
| H | -3.89715 | 2.98421  | -0.04145 |
| C | 0.72985  | 2.49161  | 0.28064  |
| H | 1.44060  | 1.66077  | 0.36225  |
| C | -2.49670 | -1.45816 | -0.30986 |
| H | -1.61259 | -2.04156 | -0.02103 |
| C | 0.97231  | 3.46017  | 1.43022  |
| H | 0.74217  | 3.02739  | 2.41318  |
| H | 2.02708  | 3.77345  | 1.44568  |
| H | 0.36744  | 4.37397  | 1.32361  |
| C | 1.01611  | 3.17686  | -1.05406 |
| H | 0.78222  | 2.51879  | -1.89836 |
| H | 0.42666  | 4.10075  | -1.16515 |
| H | 2.08023  | 3.44900  | -1.12460 |
| C | -3.66586 | -1.99343 | 0.50509  |
| H | -3.76961 | -3.07835 | 0.35858  |
| H | -3.53435 | -1.81410 | 1.58198  |
| H | -4.62177 | -1.53819 | 0.20608  |
| C | -2.71228 | -1.68753 | -1.80399 |
| H | -3.61376 | -1.16588 | -2.16132 |
| H | -1.86393 | -1.32298 | -2.40173 |
| H | -2.84178 | -2.75846 | -2.02054 |
| C | 0.69932  | -1.10215 | -0.59792 |
| H | 0.37185  | -0.94483 | -1.62793 |
| F | 3.57357  | 0.87686  | 0.12638  |
| H | 3.02884  | 0.73304  | -0.68264 |
| F | 2.26356  | 0.44672  | -1.81732 |
| H | 1.15043  | 0.57270  | -2.64271 |
| F | 0.31311  | 0.58144  | -3.16642 |

**3Bc:**  $\Delta G = -2983841.6$

|   |          |          |          |
|---|----------|----------|----------|
| C | -2.32932 | -0.14265 | 1.05458  |
| C | -3.35863 | -0.43460 | -0.04978 |
| C | -2.72029 | -0.05091 | -1.40382 |
| N | -1.04830 | -0.05824 | 0.21120  |
| H | -3.59679 | -1.50810 | -0.05192 |
| H | -4.29764 | 0.10521  | 0.13035  |
| C | -2.22045 | -1.24157 | 2.09404  |
| H | -1.36030 | -1.08636 | 2.76138  |
| H | -3.12377 | -1.21446 | 2.71793  |
| H | -2.15927 | -2.24397 | 1.65533  |
| C | -2.56194 | 1.18609  | 1.75678  |
| H | -3.46005 | 1.08954  | 2.38113  |

|   |          |          |          |
|---|----------|----------|----------|
| H | -1.72560 | 1.44562  | 2.42109  |
| H | -2.73535 | 2.01272  | 1.05675  |
| C | -2.97648 | -1.08785 | -2.49391 |
| H | -4.05548 | -1.15933 | -2.69042 |
| H | -2.47904 | -0.81188 | -3.43403 |
| H | -2.62088 | -2.08488 | -2.19636 |
| C | -3.12702 | 1.34469  | -1.89553 |
| H | -2.56869 | 1.62661  | -2.79937 |
| H | -4.19743 | 1.34327  | -2.14464 |
| H | -2.95577 | 2.11783  | -1.13390 |
| C | 0.30234  | -0.02100 | 0.72735  |
| C | 0.92075  | 1.22778  | 0.92067  |
| C | 0.98007  | -1.24626 | 0.87007  |
| C | 2.25910  | 1.21798  | 1.32988  |
| C | 2.31446  | -1.19243 | 1.28391  |
| C | 2.94725  | 0.02416  | 1.51757  |
| H | 2.77645  | 2.17033  | 1.47414  |
| H | 2.87681  | -2.12434 | 1.38600  |
| H | 3.99527  | 0.04246  | 1.82661  |
| C | 0.36227  | -2.57904 | 0.49336  |
| H | -0.71265 | -2.42611 | 0.32190  |
| C | 0.23770  | 2.54680  | 0.61931  |
| H | -0.82700 | 2.34846  | 0.44293  |
| C | 0.50660  | -3.61662 | 1.59782  |
| H | 0.09462  | -3.26261 | 2.55415  |
| H | -0.02170 | -4.54333 | 1.33011  |
| H | 1.55980  | -3.88519 | 1.77013  |
| C | 0.93459  | -3.08835 | -0.82567 |
| H | 0.80894  | -2.35206 | -1.63184 |
| H | 2.01071  | -3.29783 | -0.74682 |
| H | 0.43008  | -4.01845 | -1.12750 |
| C | 0.33296  | 3.52474  | 1.78242  |
| H | -0.24550 | 4.43589  | 1.57052  |
| H | -0.05341 | 3.09457  | 2.71809  |
| H | 1.37134  | 3.83917  | 1.96727  |
| C | 0.77746  | 3.16466  | -0.66591 |
| H | 1.84154  | 3.42485  | -0.57528 |
| H | 0.68669  | 2.47694  | -1.51805 |
| H | 0.22524  | 4.08520  | -0.90800 |
| C | -1.27794 | -0.00624 | -1.05420 |
| H | -0.41407 | 0.07257  | -1.74050 |
| F | 3.25264  | 1.69728  | -1.86827 |
| H | 2.49751  | 1.08095  | -1.96095 |
| F | 1.50343  | 0.06068  | -2.10291 |
| H | 2.58721  | -0.85690 | -1.87040 |
| F | 3.39564  | -1.39186 | -1.73859 |

**3Be'**:  $\Delta G = -2983830.7$  kJ/mol

|   |          |          |         |
|---|----------|----------|---------|
| C | -0.55587 | -0.23032 | 2.17561 |
| C | -1.94187 | -0.89419 | 2.13529 |

|   |          |          |          |
|---|----------|----------|----------|
| C | -2.50320 | -0.72194 | 0.70946  |
| N | -0.25267 | -0.11750 | 0.67422  |
| H | -1.84000 | -1.96582 | 2.35826  |
| H | -2.60800 | -0.46632 | 2.89624  |
| C | 0.48994  | -1.08454 | 2.85932  |
| H | 1.48922  | -0.63023 | 2.79925  |
| H | 0.23147  | -1.16384 | 3.92397  |
| H | 0.52713  | -2.10214 | 2.45083  |
| C | -0.56424 | 1.16339  | 2.78342  |
| H | -0.70980 | 1.06705  | 3.86760  |
| H | 0.39282  | 1.68139  | 2.62611  |
| H | -1.37672 | 1.79190  | 2.39759  |
| C | -3.21079 | -1.96487 | 0.18282  |
| H | -4.12906 | -2.13407 | 0.76279  |
| H | -3.49141 | -1.84028 | -0.87232 |
| H | -2.57886 | -2.85699 | 0.26293  |
| C | -3.43922 | 0.49070  | 0.56528  |
| H | -3.69111 | 0.66955  | -0.48955 |
| H | -4.37183 | 0.28922  | 1.11081  |
| H | -3.00085 | 1.41113  | 0.97428  |
| C | 0.98686  | 0.43523  | 0.17187  |
| C | 1.01858  | 1.81398  | -0.13334 |
| C | 2.11172  | -0.39872 | 0.01703  |
| C | 2.25123  | 2.36286  | -0.50320 |
| C | 3.31878  | 0.21049  | -0.34761 |
| C | 3.39708  | 1.57814  | -0.58178 |
| H | 2.30660  | 3.42651  | -0.74690 |
| H | 4.20720  | -0.41353 | -0.47625 |
| H | 4.35106  | 2.03138  | -0.86169 |
| C | 2.04268  | -1.91161 | 0.06246  |
| H | 1.03092  | -2.20354 | 0.38366  |
| C | -0.22549 | 2.67833  | -0.18450 |
| H | -1.02540 | 2.17547  | 0.37570  |
| C | 3.05743  | -2.53657 | 1.00998  |
| H | 2.96641  | -2.16143 | 2.03858  |
| H | 2.93109  | -3.62860 | 1.04199  |
| H | 4.08925  | -2.34359 | 0.67907  |
| C | 2.23114  | -2.44744 | -1.35686 |
| H | 1.54714  | -1.96042 | -2.06350 |
| H | 3.26130  | -2.27798 | -1.70755 |
| H | 2.04170  | -3.53030 | -1.39350 |
| C | -0.03171 | 4.04671  | 0.45237  |
| H | -0.98567 | 4.59255  | 0.48255  |
| H | 0.34207  | 3.97240  | 1.48409  |
| H | 0.67464  | 4.67192  | -0.11384 |
| C | -0.70432 | 2.80206  | -1.63006 |
| H | 0.04493  | 3.31520  | -2.25298 |
| H | -0.90311 | 1.82318  | -2.09003 |
| H | -1.63491 | 3.38731  | -1.68175 |
| C | -1.27549 | -0.39295 | -0.05852 |

|   |          |          |          |
|---|----------|----------|----------|
| H | -1.20947 | -0.29973 | -1.14634 |
| F | -0.80638 | -2.70099 | -1.48612 |
| H | -0.60346 | -1.97441 | -2.12925 |
| F | -0.37202 | -0.85625 | -2.92893 |
| H | -1.64320 | -0.29818 | -3.02974 |
| F | -2.55303 | 0.08784  | -2.97993 |

**3Bd:**  $\Delta G = -2983834.4$  kJ/mol

|   |          |          |          |
|---|----------|----------|----------|
| C | 0.13063  | -1.06490 | 1.62069  |
| C | 1.14306  | -2.15543 | 1.24699  |
| C | 0.98821  | -2.44372 | -0.26138 |
| N | -0.16923 | -0.48191 | 0.22989  |
| H | 2.15713  | -1.77589 | 1.43337  |
| H | 1.00127  | -3.05685 | 1.85779  |
| C | 0.70647  | -0.00621 | 2.53444  |
| H | -0.00646 | 0.81254  | 2.70899  |
| H | 0.90936  | -0.47128 | 3.50900  |
| H | 1.65401  | 0.39008  | 2.15362  |
| C | -1.16369 | -1.60302 | 2.20973  |
| H | -0.95415 | -1.96032 | 3.22682  |
| H | -1.92830 | -0.81707 | 2.29120  |
| H | -1.57845 | -2.44664 | 1.64403  |
| C | 2.33707  | -2.59457 | -0.95858 |
| H | 2.85980  | -3.46862 | -0.54441 |
| H | 2.21791  | -2.74873 | -2.03951 |
| H | 2.96294  | -1.70661 | -0.80491 |
| C | 0.09690  | -3.65520 | -0.56857 |
| H | -0.07381 | -3.75946 | -1.64961 |
| H | 0.59562  | -4.56844 | -0.21488 |
| H | -0.88189 | -3.59000 | -0.07386 |
| C | -0.99242 | 0.68895  | 0.03825  |
| C | -2.37399 | 0.50516  | -0.18349 |
| C | -0.39032 | 1.96264  | 0.08470  |
| C | -3.16805 | 1.65447  | -0.26684 |
| C | -1.23927 | 3.07326  | 0.00313  |
| C | -2.61339 | 2.92481  | -0.14888 |
| H | -4.24141 | 1.54657  | -0.44257 |
| H | -0.80268 | 4.07507  | 0.03895  |
| H | -3.25491 | 3.80742  | -0.20625 |
| C | 1.10941  | 2.18314  | 0.09967  |
| H | 1.61552  | 1.20676  | 0.15772  |
| C | -2.99942 | -0.85235 | -0.43911 |
| H | -2.28325 | -1.63145 | -0.14173 |
| C | 1.57663  | 3.03818  | 1.27220  |
| H | 1.22306  | 2.66636  | 2.24301  |
| H | 2.67601  | 3.06468  | 1.30707  |
| H | 1.22988  | 4.07835  | 1.17225  |
| C | 1.54854  | 2.82707  | -1.21421 |
| H | 1.24875  | 2.22766  | -2.08262 |
| H | 1.12351  | 3.83671  | -1.32578 |



|   |          |          |          |
|---|----------|----------|----------|
| H | 2.64329  | 2.91858  | -1.24410 |
| C | -4.27392 | -1.07984 | 0.36123  |
| H | -4.64021 | -2.10633 | 0.21587  |
| H | -4.11697 | -0.93167 | 1.43942  |
| H | -5.08353 | -0.40411 | 0.04758  |
| C | -3.24771 | -1.03163 | -1.93502 |
| H | -3.96547 | -0.28785 | -2.31437 |
| H | -2.32114 | -0.92490 | -2.51819 |
| H | -3.66203 | -2.02892 | -2.14469 |
| C | 0.26207  | -1.23184 | -0.72334 |
| H | 0.04156  | -0.98576 | -1.76382 |
| F | 1.89886  | -0.01184 | -2.50589 |
| H | 2.68801  | 0.21126  | -1.92615 |
| F | 3.75901  | 0.48752  | -1.15339 |
| H | 3.69527  | 0.26756  | 0.18372  |
| F | 3.65497  | 0.09106  | 1.16685  |

**3Be:**  $\Delta G = -2983825.5$  kJ/mol

|   |          |          |          |
|---|----------|----------|----------|
| C | -0.09961 | 1.15312  | 1.28648  |
| C | -0.29860 | 2.59583  | 0.78664  |
| C | 0.45464  | 2.74053  | -0.54975 |
| N | 0.37371  | 0.46605  | -0.01212 |
| H | -1.36777 | 2.77355  | 0.61427  |
| H | 0.04817  | 3.32274  | 1.53334  |
| C | -1.38722 | 0.53347  | 1.78753  |
| H | -1.27181 | -0.53663 | 2.01399  |
| H | -1.66249 | 1.03345  | 2.72650  |
| H | -2.21769 | 0.66996  | 1.08876  |
| C | 0.98719  | 1.00393  | 2.33945  |
| H | 0.61808  | 1.43684  | 3.27852  |
| H | 1.21699  | -0.05351 | 2.53501  |
| H | 1.91604  | 1.52710  | 2.08146  |
| C | -0.27389 | 3.58121  | -1.59242 |
| H | -0.36980 | 4.61134  | -1.22188 |
| H | 0.29456  | 3.61983  | -2.53254 |
| H | -1.27512 | 3.19115  | -1.79990 |
| C | 1.87663  | 3.30749  | -0.37489 |
| H | 2.46352  | 3.21778  | -1.30036 |
| H | 1.79655  | 4.37566  | -0.12871 |
| H | 2.43454  | 2.81998  | 0.43489  |
| C | 0.75155  | -0.93353 | -0.09946 |
| C | 2.12045  | -1.25662 | 0.04157  |
| C | -0.23131 | -1.91365 | -0.34554 |
| C | 2.47241  | -2.61038 | -0.01014 |
| C | 0.18436  | -3.24951 | -0.38687 |
| C | 1.51723  | -3.60032 | -0.20755 |
| H | 3.52475  | -2.88617 | 0.09454  |
| H | -0.55812 | -4.02664 | -0.58377 |
| H | 1.81701  | -4.65037 | -0.24307 |
| C | -1.66584 | -1.57554 | -0.67548 |

|   |          |          |          |
|---|----------|----------|----------|
| H | -1.85777 | -0.54210 | -0.37586 |
| C | 3.22402  | -0.22565 | 0.16729  |
| H | 2.76812  | 0.75136  | 0.36867  |
| C | -2.67063 | -2.46036 | 0.04647  |
| H | -2.49268 | -2.48461 | 1.13151  |
| H | -3.68387 | -2.06876 | -0.10870 |
| H | -2.64946 | -3.49850 | -0.31903 |
| C | -1.88192 | -1.61208 | -2.18575 |
| H | -1.18828 | -0.94043 | -2.71364 |
| H | -1.74092 | -2.62560 | -2.59392 |
| H | -2.90483 | -1.28938 | -2.43028 |
| C | 4.17335  | -0.51729 | 1.32151  |
| H | 4.89318  | 0.30524  | 1.44200  |
| H | 3.63873  | -0.63473 | 2.27510  |
| H | 4.75894  | -1.43333 | 1.15288  |
| C | 3.97962  | -0.09801 | -1.15235 |
| H | 4.48920  | -1.03803 | -1.41493 |
| H | 3.30855  | 0.15805  | -1.98550 |
| H | 4.74702  | 0.68766  | -1.08737 |
| C | 0.61099  | 1.31816  | -0.94846 |
| H | 0.99149  | 0.97664  | -1.91828 |
| F | -4.32616 | -0.43625 | 1.99668  |
| H | -4.27013 | -0.12193 | 1.06736  |
| F | -4.21464 | 0.31410  | -0.27227 |
| H | -3.20424 | 0.96859  | -0.81945 |
| F | -2.42442 | 1.45956  | -1.24290 |

**Method M06-2X/ma-def2-TZVP**

1A:  $\Delta G = -2456248.6$  kJ/mol

|   |          |          |          |
|---|----------|----------|----------|
| C | 1.11587  | 0.49390  | 1.46002  |
| C | 2.46730  | 1.08116  | 1.01911  |
| C | 2.71704  | 0.63291  | -0.43053 |
| N | 0.47877  | 0.21573  | 0.13859  |
| H | 2.40885  | 2.18087  | 1.04605  |
| H | 3.28417  | 0.78794  | 1.69574  |
| C | 0.32353  | 1.49418  | 2.29381  |
| H | -0.68438 | 1.11541  | 2.52310  |
| H | 0.83054  | 1.66501  | 3.25493  |
| H | 0.22472  | 2.46796  | 1.79623  |
| C | 1.25906  | -0.78387 | 2.28607  |
| H | 1.65882  | -0.54704 | 3.28277  |
| H | 0.28010  | -1.26516 | 2.43514  |
| H | 1.93380  | -1.52001 | 1.83064  |
| C | 3.55388  | 1.64153  | -1.20393 |
| H | 4.57043  | 1.69063  | -0.78579 |
| H | 3.64860  | 1.35794  | -2.26311 |
| H | 3.12554  | 2.65093  | -1.16410 |
| C | 3.40093  | -0.73025 | -0.51084 |
| H | 3.50659  | -1.05822 | -1.55642 |
| H | 4.41035  | -0.67790 | -0.07718 |

|   |          |          |          |
|---|----------|----------|----------|
| H | 2.85876  | -1.51901 | 0.02592  |
| C | -0.85032 | -0.28823 | -0.00507 |
| C | -1.06361 | -1.68790 | -0.10690 |
| C | -1.95685 | 0.59763  | -0.06802 |
| C | -2.37310 | -2.17372 | -0.20370 |
| C | -3.24894 | 0.06179  | -0.15700 |
| C | -3.46354 | -1.31064 | -0.21063 |
| H | -2.53650 | -3.25252 | -0.28533 |
| H | -4.10413 | 0.74275  | -0.20401 |
| H | -4.48008 | -1.70703 | -0.27946 |
| C | -1.80659 | 2.10441  | -0.13634 |
| H | -0.74533 | 2.33618  | 0.01706  |
| C | 0.08040  | -2.67533 | -0.19846 |
| H | 0.99887  | -2.12758 | 0.04480  |
| C | -2.62437 | 2.83289  | 0.92265  |
| H | -2.40198 | 2.48110  | 1.94026  |
| H | -2.42054 | 3.91402  | 0.89532  |
| H | -3.70679 | 2.70922  | 0.76213  |
| C | -2.17505 | 2.60491  | -1.53076 |
| H | -1.58226 | 2.10841  | -2.31139 |
| H | -3.23933 | 2.42936  | -1.75513 |
| H | -1.99770 | 3.68786  | -1.61837 |
| C | -0.04873 | -3.83165 | 0.78381  |
| H | 0.84655  | -4.47066 | 0.75205  |
| H | -0.16999 | -3.48351 | 1.82008  |
| H | -0.90972 | -4.47708 | 0.55042  |
| C | 0.22890  | -3.19174 | -1.62715 |
| H | -0.65475 | -3.77051 | -1.94045 |
| H | 0.35750  | -2.37179 | -2.34937 |
| H | 1.10349  | -3.85418 | -1.71782 |
| C | 1.28156  | 0.52034  | -0.95797 |
| H | 1.15700  | -0.18823 | -1.79512 |
| F | 0.90813  | 1.78897  | -1.56099 |

**1Ba:**  $\Delta G = -2456216.3$  kJ/mol

|   |          |          |          |
|---|----------|----------|----------|
| C | -1.30907 | -0.17973 | 1.59958  |
| C | -2.71333 | -0.57651 | 1.12165  |
| C | -2.79599 | -0.25230 | -0.38565 |
| N | -0.58151 | -0.09005 | 0.25340  |
| H | -2.85886 | -1.65625 | 1.27284  |
| H | -3.49198 | -0.06249 | 1.70140  |
| C | -0.66593 | -1.22031 | 2.49654  |
| H | 0.38051  | -0.97482 | 2.72888  |
| H | -1.21315 | -1.24274 | 3.44884  |
| H | -0.71055 | -2.23069 | 2.07204  |
| C | -1.26249 | 1.17871  | 2.28216  |
| H | -1.75007 | 1.09593  | 3.26291  |
| H | -0.22789 | 1.50779  | 2.45809  |
| H | -1.79054 | 1.95553  | 1.71432  |
| C | -3.45773 | -1.36543 | -1.19358 |

|   |          |          |          |
|---|----------|----------|----------|
| H | -4.49768 | -1.50279 | -0.86403 |
| H | -3.47187 | -1.12680 | -2.26647 |
| H | -2.93486 | -2.32454 | -1.06496 |
| C | -3.48377 | 1.08716  | -0.67725 |
| H | -3.42633 | 1.34008  | -1.74573 |
| H | -4.54613 | 1.02381  | -0.40124 |
| H | -3.03534 | 1.91439  | -0.10949 |
| C | 0.85201  | 0.05586  | 0.17161  |
| C | 1.40970  | 1.34768  | 0.13193  |
| C | 1.63686  | -1.11319 | 0.13344  |
| C | 2.80633  | 1.44473  | 0.16994  |
| C | 3.02674  | -0.95724 | 0.17182  |
| C | 3.60638  | 0.30769  | 0.21854  |
| H | 3.27217  | 2.43300  | 0.13625  |
| H | 3.66493  | -1.84395 | 0.14101  |
| H | 4.69398  | 0.40768  | 0.25561  |
| C | 1.02623  | -2.47652 | -0.11957 |
| H | -0.03982 | -2.43492 | 0.15046  |
| C | 0.57262  | 2.58522  | -0.11974 |
| H | -0.47763 | 2.34328  | 0.09676  |
| C | 1.66103  | -3.59300 | 0.69314  |
| H | 1.63823  | -3.38379 | 1.77306  |
| H | 1.12817  | -4.54041 | 0.52683  |
| H | 2.71034  | -3.76541 | 0.41054  |
| C | 1.08843  | -2.75448 | -1.62224 |
| H | 0.68110  | -1.90822 | -2.20029 |
| H | 2.13072  | -2.90566 | -1.94697 |
| H | 0.52757  | -3.66646 | -1.87819 |
| C | 0.95677  | 3.77081  | 0.75119  |
| H | 0.27449  | 4.61493  | 0.57408  |
| H | 0.91382  | 3.52884  | 1.82356  |
| H | 1.97293  | 4.13256  | 0.53335  |
| C | 0.64860  | 2.92125  | -1.60968 |
| H | 1.66305  | 3.25265  | -1.88492 |
| H | 0.40379  | 2.03973  | -2.22571 |
| H | -0.04448 | 3.73818  | -1.86331 |
| C | -1.36371 | -0.11729 | -0.77383 |
| H | -0.89198 | -0.03646 | -1.83478 |
| F | -0.00157 | 0.03885  | -3.02319 |

**1Bb:**  $\Delta G = -2456205.4$  kJ/mol

|   |          |          |          |
|---|----------|----------|----------|
| C | -0.74958 | -1.00051 | 1.39753  |
| C | -1.56136 | -2.21105 | 0.90257  |
| C | -1.71791 | -2.09558 | -0.63137 |
| N | -0.19288 | -0.47116 | 0.06284  |
| H | -1.02855 | -3.14000 | 1.15133  |
| H | -2.53676 | -2.25547 | 1.40434  |
| C | 0.38531  | -1.38154 | 2.32810  |
| H | 1.04259  | -0.52720 | 2.54602  |
| H | -0.05212 | -1.70399 | 3.28271  |

|   |          |          |          |
|---|----------|----------|----------|
| H | 0.99027  | -2.21527 | 1.95063  |
| C | -1.61101 | 0.08135  | 2.02607  |
| H | -2.00795 | -0.32013 | 2.96993  |
| H | -1.00344 | 0.96227  | 2.28576  |
| H | -2.46064 | 0.39466  | 1.38185  |
| C | -1.33447 | -3.38457 | -1.35874 |
| H | -2.02272 | -4.18906 | -1.06324 |
| H | -1.40345 | -3.26564 | -2.44914 |
| H | -0.31230 | -3.70700 | -1.11064 |
| C | -3.10799 | -1.61825 | -1.06945 |
| H | -3.14697 | -1.49860 | -2.16296 |
| H | -3.84394 | -2.38951 | -0.79650 |
| H | -3.39052 | -0.65420 | -0.59554 |
| C | 0.82139  | 0.55452  | -0.03185 |
| C | 0.42776  | 1.90340  | -0.12249 |
| C | 2.16959  | 0.14452  | -0.06276 |
| C | 1.44790  | 2.86273  | -0.15832 |
| C | 3.14278  | 1.14905  | -0.10372 |
| C | 2.78869  | 2.49467  | -0.13040 |
| H | 1.17621  | 3.91938  | -0.22837 |
| H | 4.19789  | 0.86546  | -0.13304 |
| H | 3.56632  | 3.26196  | -0.15673 |
| C | 2.58675  | -1.30953 | -0.16786 |
| H | 1.71809  | -1.94066 | 0.07129  |
| C | -1.01206 | 2.32972  | -0.28586 |
| H | -1.69774 | 1.49761  | -0.06921 |
| C | 3.69992  | -1.67623 | 0.80301  |
| H | 3.43893  | -1.42758 | 1.84190  |
| H | 3.90821  | -2.75499 | 0.76048  |
| H | 4.64083  | -1.15839 | 0.56411  |
| C | 2.97818  | -1.63030 | -1.60826 |
| H | 2.15820  | -1.41947 | -2.31096 |
| H | 3.84901  | -1.03735 | -1.92821 |
| H | 3.24348  | -2.69266 | -1.71346 |
| C | -1.41171 | 3.45917  | 0.65403  |
| H | -2.50213 | 3.59653  | 0.61419  |
| H | -1.14833 | 3.23991  | 1.69958  |
| H | -0.94397 | 4.42021  | 0.38854  |
| C | -1.28884 | 2.70958  | -1.73866 |
| H | -0.72184 | 3.60103  | -2.05213 |
| H | -1.03199 | 1.89325  | -2.43124 |
| H | -2.35981 | 2.92684  | -1.87030 |
| C | -0.73597 | -1.03459 | -0.95577 |
| H | -0.46190 | -0.72292 | -1.97018 |
| F | -3.77854 | 1.07330  | 0.17494  |

**2A:**  $\Delta G = -2720010.5$  kJ/mol

|   |         |          |          |
|---|---------|----------|----------|
| C | 0.81799 | -0.69239 | 1.50289  |
| C | 2.06841 | -1.49954 | 1.10173  |
| C | 1.87378 | -1.94826 | -0.35778 |

|   |          |          |          |
|---|----------|----------|----------|
| N | 0.25688  | -0.33132 | 0.16702  |
| H | 2.94646  | -0.85255 | 1.16297  |
| H | 2.22756  | -2.34745 | 1.76923  |
| C | 1.19734  | 0.52982  | 2.33368  |
| H | 0.32017  | 1.14605  | 2.54141  |
| H | 1.60420  | 0.19390  | 3.28940  |
| H | 1.95495  | 1.13750  | 1.84007  |
| C | -0.18613 | -1.50975 | 2.31710  |
| H | 0.22977  | -1.70353 | 3.30714  |
| H | -1.11498 | -0.94984 | 2.44830  |
| H | -0.41914 | -2.46811 | 1.85733  |
| C | 3.19375  | -2.05127 | -1.11528 |
| H | 3.78064  | -2.87105 | -0.69599 |
| H | 3.02184  | -2.26622 | -2.17215 |
| H | 3.78642  | -1.14148 | -1.03886 |
| C | 1.16819  | -3.30531 | -0.46282 |
| H | 0.94919  | -3.54273 | -1.50637 |
| H | 1.82811  | -4.08066 | -0.06964 |
| H | 0.23770  | -3.35129 | 0.09830  |
| C | -0.93462 | 0.45043  | -0.00716 |
| C | -2.17791 | -0.19829 | -0.14898 |
| C | -0.86270 | 1.85686  | -0.05151 |
| C | -3.33143 | 0.57283  | -0.27545 |
| C | -2.04469 | 2.58691  | -0.17201 |
| C | -3.27307 | 1.95636  | -0.26918 |
| H | -4.28822 | 0.07768  | -0.39168 |
| H | -1.99472 | 3.66876  | -0.20764 |
| H | -4.18026 | 2.54083  | -0.36249 |
| C | 0.44747  | 2.61727  | -0.06833 |
| H | 1.24434  | 1.90701  | 0.11743  |
| C | -2.30646 | -1.70351 | -0.25534 |
| H | -1.33754 | -2.13598 | -0.03179 |
| C | 0.51975  | 3.70777  | 1.00072  |
| H | 0.30644  | 3.31642  | 1.99608  |
| H | 1.52096  | 4.14446  | 1.01532  |
| H | -0.18831 | 4.51309  | 0.79414  |
| C | 0.68405  | 3.22536  | -1.45381 |
| H | 0.65130  | 2.46272  | -2.23298 |
| H | -0.07580 | 3.97761  | -1.67928 |
| H | 1.66146  | 3.71202  | -1.49113 |
| C | -3.32095 | -2.28105 | 0.73116  |
| H | -3.30369 | -3.37205 | 0.68690  |
| H | -3.10074 | -1.97845 | 1.75609  |
| H | -4.33567 | -1.95633 | 0.49193  |
| C | -2.66796 | -2.10347 | -1.68900 |
| H | -3.65037 | -1.71195 | -1.96371 |
| H | -1.93746 | -1.71942 | -2.40397 |
| H | -2.69841 | -3.19130 | -1.78181 |
| C | 0.94060  | -0.86126 | -0.88962 |
| H | 0.33171  | -1.12001 | -1.75446 |

|   |         |         |          |
|---|---------|---------|----------|
| F | 1.81934 | 0.21458 | -1.55145 |
| H | 2.94876 | 0.97615 | -0.80086 |
| F | 3.64935 | 1.46593 | -0.38076 |

**2Ba'**:  $\Delta G = -2720059.0$  kJ/mol

|   |          |          |          |
|---|----------|----------|----------|
| C | 0.81799  | -0.69239 | 1.50289  |
| C | 2.06841  | -1.49954 | 1.10173  |
| C | 1.87378  | -1.94826 | -0.35778 |
| N | 0.25688  | -0.33132 | 0.16702  |
| H | 2.94646  | -0.85255 | 1.16297  |
| H | 2.22756  | -2.34745 | 1.76923  |
| C | 1.19734  | 0.52982  | 2.33368  |
| H | 0.32017  | 1.14605  | 2.54141  |
| H | 1.60420  | 0.19390  | 3.28940  |
| H | 1.95495  | 1.13750  | 1.84007  |
| C | -0.18613 | -1.50975 | 2.31710  |
| H | 0.22977  | -1.70353 | 3.30714  |
| H | -1.11498 | -0.94984 | 2.44830  |
| H | -0.41914 | -2.46811 | 1.85733  |
| C | 3.19375  | -2.05127 | -1.11528 |
| H | 3.78064  | -2.87105 | -0.69599 |
| H | 3.02184  | -2.26622 | -2.17215 |
| H | 3.78642  | -1.14148 | -1.03886 |
| C | 1.16819  | -3.30531 | -0.46282 |
| H | 0.94919  | -3.54273 | -1.50637 |
| H | 1.82811  | -4.08066 | -0.06964 |
| H | 0.23770  | -3.35129 | 0.09830  |
| C | -0.93462 | 0.45043  | -0.00716 |
| C | -2.17791 | -0.19829 | -0.14898 |
| C | -0.86270 | 1.85686  | -0.05151 |
| C | -3.33143 | 0.57283  | -0.27545 |
| C | -2.04469 | 2.58691  | -0.17201 |
| C | -3.27307 | 1.95636  | -0.26918 |
| H | -4.28822 | 0.07768  | -0.39168 |
| H | -1.99472 | 3.66876  | -0.20764 |
| H | -4.18026 | 2.54083  | -0.36249 |
| C | 0.44747  | 2.61727  | -0.06833 |
| H | 1.24434  | 1.90701  | 0.11743  |
| C | -2.30646 | -1.70351 | -0.25534 |
| H | -1.33754 | -2.13598 | -0.03179 |
| C | 0.51975  | 3.70777  | 1.00072  |
| H | 0.30644  | 3.31642  | 1.99608  |
| H | 1.52096  | 4.14446  | 1.01532  |
| H | -0.18831 | 4.51309  | 0.79414  |
| C | 0.68405  | 3.22536  | -1.45381 |
| H | 0.65130  | 2.46272  | -2.23298 |
| H | -0.07580 | 3.97761  | -1.67928 |
| H | 1.66146  | 3.71202  | -1.49113 |
| C | -3.32095 | -2.28105 | 0.73116  |
| H | -3.30369 | -3.37205 | 0.68690  |

|   |          |          |          |
|---|----------|----------|----------|
| H | -3.10074 | -1.97845 | 1.75609  |
| H | -4.33567 | -1.95633 | 0.49193  |
| C | -2.66796 | -2.10347 | -1.68900 |
| H | -3.65037 | -1.71195 | -1.96371 |
| H | -1.93746 | -1.71942 | -2.40397 |
| H | -2.69841 | -3.19130 | -1.78181 |
| C | 0.94060  | -0.86126 | -0.88962 |
| H | 0.33171  | -1.12001 | -1.75446 |
| F | 1.81934  | 0.21458  | -1.55145 |
| H | 2.94876  | 0.97615  | -0.80086 |
| F | 3.64935  | 1.46593  | -0.38076 |

**2Bb:**  $\Delta G = -2720052.4$  kJ/mol

|   |          |          |          |
|---|----------|----------|----------|
| C | 0.24684  | 1.19275  | 1.33054  |
| C | 0.46515  | 2.63967  | 0.85945  |
| C | 0.52448  | 2.63725  | -0.68479 |
| N | -0.22444 | 0.54130  | 0.01646  |
| H | -0.37489 | 3.26549  | 1.19341  |
| H | 1.37744  | 3.06108  | 1.30116  |
| C | -0.81270 | 1.05857  | 2.40495  |
| H | -1.04582 | 0.00640  | 2.62257  |
| H | -0.41613 | 1.49995  | 3.32918  |
| H | -1.73962 | 1.59176  | 2.16228  |
| C | 1.53010  | 0.51272  | 1.77031  |
| H | 1.86841  | 0.99106  | 2.69996  |
| H | 1.36711  | -0.55162 | 1.99474  |
| H | 2.33636  | 0.59636  | 1.03068  |
| C | -0.36154 | 3.71858  | -1.30446 |
| H | 0.01074  | 4.70890  | -1.00654 |
| H | -0.34716 | 3.66881  | -2.40213 |
| H | -1.40516 | 3.63533  | -0.96824 |
| C | 1.94644  | 2.73068  | -1.25001 |
| H | 1.93044  | 2.68393  | -2.34877 |
| H | 2.37624  | 3.70188  | -0.96541 |
| H | 2.60615  | 1.92700  | -0.88603 |
| C | -0.83944 | -0.76525 | -0.05875 |
| C | -0.03420 | -1.90249 | -0.26169 |
| C | -2.24451 | -0.82609 | 0.04249  |
| C | -0.68260 | -3.14385 | -0.28178 |
| C | -2.83330 | -2.09490 | 0.01216  |
| C | -2.06109 | -3.24364 | -0.12902 |
| H | -0.08882 | -4.04757 | -0.44055 |
| H | -3.92063 | -2.17872 | 0.08265  |
| H | -2.54208 | -4.22458 | -0.14598 |
| C | -3.12430 | 0.40900  | 0.06647  |
| H | -2.49653 | 1.28361  | 0.29295  |
| C | 1.44505  | -1.82314 | -0.56563 |
| H | 1.83048  | -0.83050 | -0.30256 |
| C | -4.21049 | 0.34154  | 1.13057  |
| H | -3.79709 | 0.14064  | 2.12952  |



|   |          |          |          |
|---|----------|----------|----------|
| H | -4.75798 | 1.29365  | 1.18113  |
| H | -4.95167 | -0.44207 | 0.91408  |
| C | -3.71969 | 0.64312  | -1.31980 |
| H | -2.93974 | 0.74548  | -2.08897 |
| H | -4.37225 | -0.19125 | -1.62034 |
| H | -4.32611 | 1.56079  | -1.33441 |
| C | 2.27170  | -2.83331 | 0.21715  |
| H | 3.34125  | -2.63299 | 0.07149  |
| H | 2.07884  | -2.77290 | 1.29872  |
| H | 2.07735  | -3.86958 | -0.09977 |
| C | 1.68161  | -1.97185 | -2.06651 |
| H | 1.38559  | -2.96803 | -2.43233 |
| H | 1.11778  | -1.22549 | -2.64660 |
| H | 2.74802  | -1.82943 | -2.29454 |
| C | -0.03187 | 1.29974  | -1.00266 |
| H | -0.28246 | 0.94643  | -2.00920 |
| F | 3.80115  | 0.23830  | -0.58163 |
| H | 4.14144  | -0.29994 | 0.51871  |
| F | 4.40416  | -0.73913 | 1.42607  |

**2Aa:**  $\Delta G = -2720010.0$  kJ/mol

|   |          |          |          |
|---|----------|----------|----------|
| C | -0.95053 | 0.16572  | 1.79668  |
| C | -2.44842 | -0.11520 | 1.56115  |
| C | -2.72296 | 0.05469  | 0.05597  |
| N | -0.40804 | 0.04936  | 0.39748  |
| H | -2.67396 | -1.15253 | 1.85156  |
| H | -3.08584 | 0.53634  | 2.17651  |
| C | -0.32938 | -0.86470 | 2.72922  |
| H | 0.76035  | -0.73115 | 2.80742  |
| H | -0.74514 | -0.74610 | 3.74022  |
| H | -0.53431 | -1.89424 | 2.40730  |
| C | -0.68171 | 1.55287  | 2.37103  |
| H | -0.99607 | 1.58331  | 3.42375  |
| H | 0.39234  | 1.79229  | 2.34548  |
| H | -1.22454 | 2.35019  | 1.84771  |
| C | -3.83225 | -0.85386 | -0.45503 |
| H | -4.80580 | -0.51536 | -0.07144 |
| H | -3.88436 | -0.83361 | -1.55444 |
| H | -3.69046 | -1.89610 | -0.14645 |
| C | -3.07342 | 1.49751  | -0.31254 |
| H | -3.13454 | 1.62558  | -1.40391 |
| H | -4.05438 | 1.76128  | 0.10797  |
| H | -2.35211 | 2.23109  | 0.06857  |
| C | 0.98049  | 0.21553  | 0.06896  |
| C | 1.45125  | 1.49873  | -0.30771 |
| C | 1.86830  | -0.88728 | 0.10462  |
| C | 2.81385  | 1.66558  | -0.58093 |
| C | 3.22380  | -0.66535 | -0.17450 |
| C | 3.70137  | 0.59828  | -0.49970 |
| H | 3.18085  | 2.65266  | -0.87580 |

|   |          |          |          |
|---|----------|----------|----------|
| H | 3.91451  | -1.51315 | -0.15150 |
| H | 4.76330  | 0.74791  | -0.71139 |
| C | 1.41474  | -2.31480 | 0.33025  |
| H | 0.36386  | -2.28768 | 0.63791  |
| C | 0.52103  | 2.67459  | -0.51587 |
| H | -0.44147 | 2.41145  | -0.06402 |
| C | 2.21442  | -3.03075 | 1.41051  |
| H | 2.20965  | -2.48287 | 2.36413  |
| H | 1.79635  | -4.03031 | 1.60231  |
| H | 3.26649  | -3.17635 | 1.12053  |
| C | 1.46721  | -3.08689 | -0.98616 |
| H | 0.86442  | -2.60225 | -1.76662 |
| H | 2.49887  | -3.17504 | -1.36264 |
| H | 1.07735  | -4.10824 | -0.85633 |
| C | 1.00770  | 3.95380  | 0.14996  |
| H | 0.24845  | 4.74557  | 0.06603  |
| H | 1.21722  | 3.80823  | 1.21999  |
| H | 1.92547  | 4.34291  | -0.31686 |
| C | 0.26718  | 2.89181  | -2.00509 |
| H | 1.19179  | 3.17095  | -2.53499 |
| H | -0.12846 | 1.98616  | -2.48844 |
| H | -0.46233 | 3.70024  | -2.16633 |
| C | -1.35388 | -0.27960 | -0.51492 |
| H | -1.13665 | 0.00925  | -1.55180 |
| F | -1.38725 | -1.87632 | -0.73699 |
| H | -1.43127 | -2.03744 | -2.27244 |
| F | -1.42009 | -1.97287 | -3.22187 |

**2Ba:**  $\Delta G = -2720055.5$  kJ/mol

|   |          |          |          |
|---|----------|----------|----------|
| C | 0.61848  | -0.88233 | -1.93472 |
| C | 1.94409  | -1.60342 | -1.63588 |
| C | 2.45293  | -1.09605 | -0.26961 |
| N | 0.26347  | -0.37416 | -0.53148 |
| H | 1.76516  | -2.68700 | -1.57958 |
| H | 2.67597  | -1.43695 | -2.43746 |
| C | -0.46321 | -1.80987 | -2.45341 |
| H | -1.43688 | -1.30438 | -2.52936 |
| H | -0.18504 | -2.13250 | -3.46581 |
| H | -0.57315 | -2.71354 | -1.84178 |
| C | 0.76523  | 0.30652  | -2.87186 |
| H | 0.95653  | -0.07072 | -3.88525 |
| H | -0.15630 | 0.90529  | -2.91321 |
| H | 1.60246  | 0.96163  | -2.60025 |
| C | 2.98397  | -2.20166 | 0.63740  |
| H | 3.86892  | -2.66908 | 0.18319  |
| H | 3.27612  | -1.79197 | 1.61449  |
| H | 2.23206  | -2.98684 | 0.80293  |
| C | 3.49075  | 0.03029  | -0.38332 |
| H | 3.68663  | 0.47139  | 0.60357  |
| H | 4.43053  | -0.37999 | -0.77964 |

|   |          |          |          |
|---|----------|----------|----------|
| H | 3.15755  | 0.82998  | -1.05952 |
| C | -0.99143 | 0.26250  | -0.20931 |
| C | -1.07167 | 1.66727  | -0.28164 |
| C | -2.06611 | -0.54523 | 0.20697  |
| C | -2.32226 | 2.24699  | -0.03747 |
| C | -3.29132 | 0.08951  | 0.44001  |
| C | -3.42624 | 1.46659  | 0.29251  |
| H | -2.42354 | 3.33406  | -0.08551 |
| H | -4.14669 | -0.50705 | 0.76726  |
| H | -4.39364 | 1.94152  | 0.47309  |
| C | -1.88999 | -2.00871 | 0.55702  |
| H | -0.93858 | -2.35654 | 0.12807  |
| C | 0.15166  | 2.54375  | -0.46253 |
| H | 0.96047  | 1.92962  | -0.88196 |
| C | -2.99542 | -2.89781 | 0.00927  |
| H | -3.10778 | -2.79395 | -1.07989 |
| H | -2.78057 | -3.95492 | 0.22236  |
| H | -3.97033 | -2.67218 | 0.46681  |
| C | -1.75977 | -2.13886 | 2.07445  |
| H | -0.96305 | -1.49103 | 2.47164  |
| H | -2.69751 | -1.85305 | 2.57676  |
| H | -1.53524 | -3.17744 | 2.36004  |
| C | -0.07291 | 3.70652  | -1.41633 |
| H | 0.86502  | 4.25758  | -1.57630 |
| H | -0.43289 | 3.37035  | -2.39992 |
| H | -0.80361 | 4.42941  | -1.02365 |
| C | 0.63269  | 3.02231  | 0.90753  |
| H | -0.10695 | 3.69278  | 1.37353  |
| H | 0.79837  | 2.18342  | 1.59991  |
| H | 1.57536  | 3.58288  | 0.81447  |
| C | 1.22672  | -0.49751 | 0.31275  |
| H | 1.07965  | -0.15709 | 1.36215  |
| F | 0.55857  | 0.32220  | 2.98633  |
| H | 1.82575  | 0.54952  | 2.94352  |
| F | 2.83629  | 0.71681  | 2.81419  |

**2Bc:**  $\Delta G = -2720048.4$  kJ/mol

|   |          |          |          |
|---|----------|----------|----------|
| C | -0.63994 | -0.96257 | 1.26308  |
| C | -1.63718 | -1.98484 | 0.68071  |
| C | -1.50405 | -1.97460 | -0.86107 |
| N | 0.05396  | -0.45752 | -0.01361 |
| H | -1.42960 | -2.98679 | 1.07944  |
| H | -2.65923 | -1.70873 | 0.97210  |
| C | 0.39400  | -1.58382 | 2.18309  |
| H | 1.18217  | -0.86796 | 2.45867  |
| H | -0.11070 | -1.88691 | 3.11023  |
| H | 0.85665  | -2.48144 | 1.75309  |
| C | -1.33439 | 0.19947  | 1.94934  |
| H | -1.76635 | -0.17301 | 2.88860  |
| H | -0.63067 | 1.00438  | 2.20781  |

|   |          |          |          |
|---|----------|----------|----------|
| H | -2.15963 | 0.59426  | 1.34316  |
| C | -1.08882 | -3.32829 | -1.43948 |
| H | -1.88045 | -4.06521 | -1.24449 |
| H | -0.93921 | -3.27288 | -2.52699 |
| H | -0.16053 | -3.70018 | -0.98182 |
| C | -2.76442 | -1.45002 | -1.55706 |
| H | -2.61120 | -1.34970 | -2.64134 |
| H | -3.58527 | -2.16359 | -1.39478 |
| H | -3.07457 | -0.48057 | -1.14063 |
| C | 1.11953  | 0.52163  | -0.01167 |
| C | 0.78035  | 1.88593  | -0.11165 |
| C | 2.45132  | 0.06623  | 0.05140  |
| C | 1.82986  | 2.81045  | -0.05687 |
| C | 3.45705  | 1.03875  | 0.10190  |
| C | 3.15162  | 2.39539  | 0.06887  |
| H | 1.60061  | 3.87649  | -0.13351 |
| H | 4.50131  | 0.71942  | 0.14895  |
| H | 3.95413  | 3.13560  | 0.11363  |
| C | 2.83218  | -1.39734 | -0.05028 |
| H | 1.92505  | -2.00356 | 0.08068  |
| C | -0.63057 | 2.35918  | -0.38267 |
| H | -1.33271 | 1.53881  | -0.19289 |
| C | 3.82715  | -1.82600 | 1.01855  |
| H | 3.46710  | -1.59907 | 2.03233  |
| H | 4.00740  | -2.90929 | 0.96370  |
| H | 4.80252  | -1.33242 | 0.89356  |
| C | 3.36121  | -1.69544 | -1.45107 |
| H | 2.62778  | -1.43612 | -2.22903 |
| H | 4.28129  | -1.12857 | -1.66164 |
| H | 3.59882  | -2.76404 | -1.55883 |
| C | -1.05958 | 3.51348  | 0.51136  |
| H | -2.13052 | 3.71552  | 0.36844  |
| H | -0.90623 | 3.28839  | 1.57718  |
| H | -0.51596 | 4.44391  | 0.28641  |
| C | -0.79336 | 2.71656  | -1.85762 |
| H | -0.16638 | 3.57617  | -2.14301 |
| H | -0.52238 | 1.87636  | -2.51500 |
| H | -1.84080 | 2.97844  | -2.06990 |
| C | -0.41320 | -0.99819 | -1.08045 |
| H | -0.00696 | -0.72394 | -2.06075 |
| F | -3.63505 | 1.39457  | -0.16986 |
| H | -4.07780 | 0.45245  | 0.48985  |
| F | -4.44361 | -0.37227 | 1.06003  |

**2Bd:**  $\Delta G = -2720050.8$  kJ/mol

|   |          |          |          |
|---|----------|----------|----------|
| C | -0.63994 | -0.96257 | 1.26308  |
| C | -1.63718 | -1.98484 | 0.68071  |
| C | -1.50405 | -1.97460 | -0.86107 |
| N | 0.05396  | -0.45752 | -0.01361 |
| H | -1.42960 | -2.98679 | 1.07944  |

|   |          |          |          |
|---|----------|----------|----------|
| H | -2.65923 | -1.70873 | 0.97210  |
| C | 0.39400  | -1.58382 | 2.18309  |
| H | 1.18217  | -0.86796 | 2.45867  |
| H | -0.11070 | -1.88691 | 3.11023  |
| H | 0.85665  | -2.48144 | 1.75309  |
| C | -1.33439 | 0.19947  | 1.94934  |
| H | -1.76635 | -0.17301 | 2.88860  |
| H | -0.63067 | 1.00438  | 2.20781  |
| H | -2.15963 | 0.59426  | 1.34316  |
| C | -1.08882 | -3.32829 | -1.43948 |
| H | -1.88045 | -4.06521 | -1.24449 |
| H | -0.93921 | -3.27288 | -2.52699 |
| H | -0.16053 | -3.70018 | -0.98182 |
| C | -2.76442 | -1.45002 | -1.55706 |
| H | -2.61120 | -1.34970 | -2.64134 |
| H | -3.58527 | -2.16359 | -1.39478 |
| H | -3.07457 | -0.48057 | -1.14063 |
| C | 1.11953  | 0.52163  | -0.01167 |
| C | 0.78035  | 1.88593  | -0.11165 |
| C | 2.45132  | 0.06623  | 0.05140  |
| C | 1.82986  | 2.81045  | -0.05687 |
| C | 3.45705  | 1.03875  | 0.10190  |
| C | 3.15162  | 2.39539  | 0.06887  |
| H | 1.60061  | 3.87649  | -0.13351 |
| H | 4.50131  | 0.71942  | 0.14895  |
| H | 3.95413  | 3.13560  | 0.11363  |
| C | 2.83218  | -1.39734 | -0.05028 |
| H | 1.92505  | -2.00356 | 0.08068  |
| C | -0.63057 | 2.35918  | -0.38267 |
| H | -1.33271 | 1.53881  | -0.19289 |
| C | 3.82715  | -1.82600 | 1.01855  |
| H | 3.46710  | -1.59907 | 2.03233  |
| H | 4.00740  | -2.90929 | 0.96370  |
| H | 4.80252  | -1.33242 | 0.89356  |
| C | 3.36121  | -1.69544 | -1.45107 |
| H | 2.62778  | -1.43612 | -2.22903 |
| H | 4.28129  | -1.12857 | -1.66164 |
| H | 3.59882  | -2.76404 | -1.55883 |
| C | -1.05958 | 3.51348  | 0.51136  |
| H | -2.13052 | 3.71552  | 0.36844  |
| H | -0.90623 | 3.28839  | 1.57718  |
| H | -0.51596 | 4.44391  | 0.28641  |
| C | -0.79336 | 2.71656  | -1.85762 |
| H | -0.16638 | 3.57617  | -2.14301 |
| H | -0.52238 | 1.87636  | -2.51500 |
| H | -1.84080 | 2.97844  | -2.06990 |
| C | -0.41320 | -0.99819 | -1.08045 |
| H | -0.00696 | -0.72394 | -2.06075 |
| F | -3.63505 | 1.39457  | -0.16986 |
| H | -4.07780 | 0.45245  | 0.48985  |

|   |          |          |         |
|---|----------|----------|---------|
| F | -4.44361 | -0.37227 | 1.06003 |
|---|----------|----------|---------|

**3Ba:**  $\Delta G = -2983843.8$  kJ/mol

|   |          |          |          |
|---|----------|----------|----------|
| C | 0.13063  | -1.06490 | 1.62069  |
| C | 1.14306  | -2.15543 | 1.24699  |
| C | 0.98821  | -2.44372 | -0.26138 |
| N | -0.16923 | -0.48191 | 0.22989  |
| H | 2.15713  | -1.77589 | 1.43337  |
| H | 1.00127  | -3.05685 | 1.85779  |
| C | 0.70647  | -0.00621 | 2.53444  |
| H | -0.00646 | 0.81254  | 2.70899  |
| H | 0.90936  | -0.47128 | 3.50900  |
| H | 1.65401  | 0.39008  | 2.15362  |
| C | -1.16369 | -1.60302 | 2.20973  |
| H | -0.95415 | -1.96032 | 3.22682  |
| H | -1.92830 | -0.81707 | 2.29120  |
| H | -1.57845 | -2.44664 | 1.64403  |
| C | 2.33707  | -2.59457 | -0.95858 |
| H | 2.85980  | -3.46862 | -0.54441 |
| H | 2.21791  | -2.74873 | -2.03951 |
| H | 2.96294  | -1.70661 | -0.80491 |
| C | 0.09690  | -3.65520 | -0.56857 |
| H | -0.07381 | -3.75946 | -1.64961 |
| H | 0.59562  | -4.56844 | -0.21488 |
| H | -0.88189 | -3.59000 | -0.07386 |
| C | -0.99242 | 0.68895  | 0.03825  |
| C | -2.37399 | 0.50516  | -0.18349 |
| C | -0.39032 | 1.96264  | 0.08470  |
| C | -3.16805 | 1.65447  | -0.26684 |
| C | -1.23927 | 3.07326  | 0.00313  |
| C | -2.61339 | 2.92481  | -0.14888 |
| H | -4.24141 | 1.54657  | -0.44257 |
| H | -0.80268 | 4.07507  | 0.03895  |
| H | -3.25491 | 3.80742  | -0.20625 |
| C | 1.10941  | 2.18314  | 0.09967  |
| H | 1.61552  | 1.20676  | 0.15772  |
| C | -2.99942 | -0.85235 | -0.43911 |
| H | -2.28325 | -1.63145 | -0.14173 |
| C | 1.57663  | 3.03818  | 1.27220  |
| H | 1.22306  | 2.66636  | 2.24301  |
| H | 2.67601  | 3.06468  | 1.30707  |
| H | 1.22988  | 4.07835  | 1.17225  |
| C | 1.54854  | 2.82707  | -1.21421 |
| H | 1.24875  | 2.22766  | -2.08262 |
| H | 1.12351  | 3.83671  | -1.32578 |
| H | 2.64329  | 2.91858  | -1.24410 |
| C | -4.27392 | -1.07984 | 0.36123  |
| H | -4.64021 | -2.10633 | 0.21587  |
| H | -4.11697 | -0.93167 | 1.43942  |
| H | -5.08353 | -0.40411 | 0.04758  |

|   |          |          |          |
|---|----------|----------|----------|
| C | -3.24771 | -1.03163 | -1.93502 |
| H | -3.96547 | -0.28785 | -2.31437 |
| H | -2.32114 | -0.92490 | -2.51819 |
| H | -3.66203 | -2.02892 | -2.14469 |
| C | 0.26207  | -1.23184 | -0.72334 |
| H | 0.04156  | -0.98576 | -1.76382 |
| F | 1.89886  | -0.01184 | -2.50589 |
| H | 2.68801  | 0.21126  | -1.92615 |
| F | 3.75901  | 0.48752  | -1.15339 |
| H | 3.69527  | 0.26756  | 0.18372  |
| F | 3.65497  | 0.09106  | 1.16685  |

**3Bc:**  $\Delta G = -2983858.1$  kJ/mol

|   |          |          |          |
|---|----------|----------|----------|
| C | 0.69688  | -0.35319 | -2.22685 |
| C | 2.09403  | -0.96449 | -2.03017 |
| C | 2.56020  | -0.61488 | -0.59966 |
| N | 0.28671  | -0.14409 | -0.76006 |
| H | 2.03111  | -2.05729 | -2.13591 |
| H | 2.79616  | -0.60313 | -2.79294 |
| C | -0.27450 | -1.27791 | -2.93350 |
| H | -1.30104 | -0.88421 | -2.91722 |
| H | 0.02820  | -1.35086 | -3.98661 |
| H | -0.27154 | -2.29460 | -2.52402 |
| C | 0.71480  | 0.99435  | -2.93155 |
| H | 0.96621  | 0.82785  | -3.98740 |
| H | -0.27122 | 1.47988  | -2.90149 |
| H | 1.46386  | 1.68100  | -2.51835 |
| C | 3.20953  | -1.78327 | 0.13810  |
| H | 4.13616  | -2.08102 | -0.37211 |
| H | 3.45632  | -1.49594 | 1.16900  |
| H | 2.54415  | -2.65836 | 0.17641  |
| C | 3.47675  | 0.61517  | -0.54041 |
| H | 3.67582  | 0.89796  | 0.50111  |
| H | 4.43225  | 0.37376  | -1.02706 |
| H | 3.04189  | 1.48125  | -1.05806 |
| C | -1.04342 | 0.21146  | -0.32431 |
| C | -1.34595 | 1.57100  | -0.12006 |
| C | -1.94708 | -0.82862 | -0.03887 |
| C | -2.64486 | 1.87683  | 0.30231  |
| C | -3.23043 | -0.46133 | 0.38051  |
| C | -3.58322 | 0.87575  | 0.53145  |
| H | -2.91486 | 2.92139  | 0.47634  |
| H | -3.95689 | -1.24324 | 0.61638  |
| H | -4.59143 | 1.13938  | 0.86003  |
| C | -1.54600 | -2.29060 | -0.03780 |
| H | -0.57664 | -2.38793 | -0.54831 |
| C | -0.30574 | 2.66991  | -0.21141 |
| H | 0.55757  | 2.28548  | -0.77099 |
| C | -2.54464 | -3.17424 | -0.77135 |
| H | -2.73048 | -2.82526 | -1.79765 |

|   |          |          |          |
|---|----------|----------|----------|
| H | -2.17288 | -4.20723 | -0.83255 |
| H | -3.51475 | -3.21338 | -0.25348 |
| C | -1.32676 | -2.76800 | 1.39618  |
| H | -0.52994 | -2.20337 | 1.89959  |
| H | -2.24246 | -2.65995 | 1.99875  |
| H | -1.04597 | -3.83180 | 1.40862  |
| C | -0.81030 | 3.90069  | -0.95079 |
| H | 0.00319  | 4.62797  | -1.08539 |
| H | -1.20198 | 3.65090  | -1.94780 |
| H | -1.61086 | 4.41612  | -0.39927 |
| C | 0.20301  | 3.02821  | 1.18398  |
| H | -0.61697 | 3.37047  | 1.83481  |
| H | 0.68241  | 2.17378  | 1.68283  |
| H | 0.94341  | 3.84011  | 1.12700  |
| C | 1.27405  | -0.27013 | 0.05337  |
| H | 1.12362  | -0.15419 | 1.13304  |
| F | -0.64452 | 0.17564  | 2.87166  |
| H | 0.14951  | -0.40061 | 2.97139  |
| F | 1.32274  | -1.16466 | 3.00545  |
| H | 2.23010  | -0.14207 | 2.84607  |
| F | 2.82434  | 0.63296  | 2.66294  |

**3Be'**:  $\Delta G = -2983844.9$  kJ/mol

|   |          |          |          |
|---|----------|----------|----------|
| C | -0.55587 | -0.23032 | 2.17561  |
| C | -1.94187 | -0.89419 | 2.13529  |
| C | -2.50320 | -0.72194 | 0.70946  |
| N | -0.25267 | -0.11750 | 0.67422  |
| H | -1.84000 | -1.96582 | 2.35826  |
| H | -2.60800 | -0.46632 | 2.89624  |
| C | 0.48994  | -1.08454 | 2.85932  |
| H | 1.48922  | -0.63023 | 2.79925  |
| H | 0.23147  | -1.16384 | 3.92397  |
| H | 0.52713  | -2.10214 | 2.45083  |
| C | -0.56424 | 1.16339  | 2.78342  |
| H | -0.70980 | 1.06705  | 3.86760  |
| H | 0.39282  | 1.68139  | 2.62611  |
| H | -1.37672 | 1.79190  | 2.39759  |
| C | -3.21079 | -1.96487 | 0.18282  |
| H | -4.12906 | -2.13407 | 0.76279  |
| H | -3.49141 | -1.84028 | -0.87232 |
| H | -2.57886 | -2.85699 | 0.26293  |
| C | -3.43922 | 0.49070  | 0.56528  |
| H | -3.69111 | 0.66955  | -0.48955 |
| H | -4.37183 | 0.28922  | 1.11081  |
| H | -3.00085 | 1.41113  | 0.97428  |
| C | 0.98686  | 0.43523  | 0.17187  |
| C | 1.01858  | 1.81398  | -0.13334 |
| C | 2.11172  | -0.39872 | 0.01703  |
| C | 2.25123  | 2.36286  | -0.50320 |
| C | 3.31878  | 0.21049  | -0.34761 |



|   |          |          |          |
|---|----------|----------|----------|
| C | 3.39708  | 1.57814  | -0.58178 |
| H | 2.30660  | 3.42651  | -0.74690 |
| H | 4.20720  | -0.41353 | -0.47625 |
| H | 4.35106  | 2.03138  | -0.86169 |
| C | 2.04268  | -1.91161 | 0.06246  |
| H | 1.03092  | -2.20354 | 0.38366  |
| C | -0.22549 | 2.67833  | -0.18450 |
| H | -1.02540 | 2.17547  | 0.37570  |
| C | 3.05743  | -2.53657 | 1.00998  |
| H | 2.96641  | -2.16143 | 2.03858  |
| H | 2.93109  | -3.62860 | 1.04199  |
| H | 4.08925  | -2.34359 | 0.67907  |
| C | 2.23114  | -2.44744 | -1.35686 |
| H | 1.54714  | -1.96042 | -2.06350 |
| H | 3.26130  | -2.27798 | -1.70755 |
| H | 2.04170  | -3.53030 | -1.39350 |
| C | -0.03171 | 4.04671  | 0.45237  |
| H | -0.98567 | 4.59255  | 0.48255  |
| H | 0.34207  | 3.97240  | 1.48409  |
| H | 0.67464  | 4.67192  | -0.11384 |
| C | -0.70432 | 2.80206  | -1.63006 |
| H | 0.04493  | 3.31520  | -2.25298 |
| H | -0.90311 | 1.82318  | -2.09003 |
| H | -1.63491 | 3.38731  | -1.68175 |
| C | -1.27549 | -0.39295 | -0.05852 |
| H | -1.20947 | -0.29973 | -1.14634 |
| F | -0.80638 | -2.70099 | -1.48612 |
| H | -0.60346 | -1.97441 | -2.12925 |
| F | -0.37202 | -0.85625 | -2.92893 |
| H | -1.64320 | -0.29818 | -3.02974 |
| F | -2.55303 | 0.08784  | -2.97993 |

**3Bb:**  $\Delta G = -2983840.3$  kJ/mol

|   |          |          |          |
|---|----------|----------|----------|
| C | 0.62142  | -0.90599 | 1.74629  |
| C | 1.76961  | -1.84559 | 1.35108  |
| C | 1.59034  | -2.20373 | -0.13669 |
| N | 0.16680  | -0.41986 | 0.36136  |
| H | 2.72500  | -1.31771 | 1.47775  |
| H | 1.79462  | -2.73579 | 1.99376  |
| C | 1.08341  | 0.24897  | 2.60791  |
| H | 0.26546  | 0.95322  | 2.81471  |
| H | 1.41439  | -0.15487 | 3.57456  |
| H | 1.93036  | 0.78552  | 2.16342  |
| C | -0.54719 | -1.60997 | 2.41972  |
| H | -0.23956 | -1.90355 | 3.43221  |
| H | -1.41545 | -0.94300 | 2.52199  |
| H | -0.86181 | -2.52129 | 1.89609  |
| C | 2.91266  | -2.27880 | -0.89013 |
| H | 3.48680  | -3.14169 | -0.52335 |
| H | 2.75237  | -2.41438 | -1.96860 |

|   |          |          |          |
|---|----------|----------|----------|
| H | 3.50920  | -1.37311 | -0.74191 |
| C | 0.81729  | -3.51576 | -0.35573 |
| H | 0.57983  | -3.66459 | -1.41907 |
| H | 1.44482  | -4.35656 | -0.02864 |
| H | -0.12110 | -3.55899 | 0.21264  |
| C | -0.91882 | 0.52240  | 0.18298  |
| C | -2.21418 | 0.00779  | -0.04982 |
| C | -0.66537 | 1.90783  | 0.26000  |
| C | -3.27009 | 0.92334  | -0.12536 |
| C | -1.76305 | 2.77331  | 0.18458  |
| C | -3.05496 | 2.29017  | 0.01305  |
| H | -4.28133 | 0.55133  | -0.30847 |
| H | -1.58880 | 3.85139  | 0.23775  |
| H | -3.89715 | 2.98421  | -0.04145 |
| C | 0.72985  | 2.49161  | 0.28064  |
| H | 1.44060  | 1.66077  | 0.36225  |
| C | -2.49670 | -1.45816 | -0.30986 |
| H | -1.61259 | -2.04156 | -0.02103 |
| C | 0.97231  | 3.46017  | 1.43022  |
| H | 0.74217  | 3.02739  | 2.41318  |
| H | 2.02708  | 3.77345  | 1.44568  |
| H | 0.36744  | 4.37397  | 1.32361  |
| C | 1.01611  | 3.17686  | -1.05406 |
| H | 0.78222  | 2.51879  | -1.89836 |
| H | 0.42666  | 4.10075  | -1.16515 |
| H | 2.08023  | 3.44900  | -1.12460 |
| C | -3.66586 | -1.99343 | 0.50509  |
| H | -3.76961 | -3.07835 | 0.35858  |
| H | -3.53435 | -1.81410 | 1.58198  |
| H | -4.62177 | -1.53819 | 0.20608  |
| C | -2.71228 | -1.68753 | -1.80399 |
| H | -3.61376 | -1.16588 | -2.16132 |
| H | -1.86393 | -1.32298 | -2.40173 |
| H | -2.84178 | -2.75846 | -2.02054 |
| C | 0.69932  | -1.10215 | -0.59792 |
| H | 0.37185  | -0.94483 | -1.62793 |
| F | 3.57357  | 0.87686  | 0.12638  |
| H | 3.02884  | 0.73304  | -0.68264 |
| F | 2.26356  | 0.44672  | -1.81732 |
| H | 1.15043  | 0.57270  | -2.64271 |
| F | 0.31311  | 0.58144  | -3.16642 |

**3Bd:**  $\Delta G = -2983847.3$  kJ/mol

|   |         |          |          |
|---|---------|----------|----------|
| C | 0.62142 | -0.90599 | 1.74629  |
| C | 1.76961 | -1.84559 | 1.35108  |
| C | 1.59034 | -2.20373 | -0.13669 |
| N | 0.16680 | -0.41986 | 0.36136  |
| H | 2.72500 | -1.31771 | 1.47775  |
| H | 1.79462 | -2.73579 | 1.99376  |
| C | 1.08341 | 0.24897  | 2.60791  |

|   |          |          |          |
|---|----------|----------|----------|
| H | 0.26546  | 0.95322  | 2.81471  |
| H | 1.41439  | -0.15487 | 3.57456  |
| H | 1.93036  | 0.78552  | 2.16342  |
| C | -0.54719 | -1.60997 | 2.41972  |
| H | -0.23956 | -1.90355 | 3.43221  |
| H | -1.41545 | -0.94300 | 2.52199  |
| H | -0.86181 | -2.52129 | 1.89609  |
| C | 2.91266  | -2.27880 | -0.89013 |
| H | 3.48680  | -3.14169 | -0.52335 |
| H | 2.75237  | -2.41438 | -1.96860 |
| H | 3.50920  | -1.37311 | -0.74191 |
| C | 0.81729  | -3.51576 | -0.35573 |
| H | 0.57983  | -3.66459 | -1.41907 |
| H | 1.44482  | -4.35656 | -0.02864 |
| H | -0.12110 | -3.55899 | 0.21264  |
| C | -0.91882 | 0.52240  | 0.18298  |
| C | -2.21418 | 0.00779  | -0.04982 |
| C | -0.66537 | 1.90783  | 0.26000  |
| C | -3.27009 | 0.92334  | -0.12536 |
| C | -1.76305 | 2.77331  | 0.18458  |
| C | -3.05496 | 2.29017  | 0.01305  |
| H | -4.28133 | 0.55133  | -0.30847 |
| H | -1.58880 | 3.85139  | 0.23775  |
| H | -3.89715 | 2.98421  | -0.04145 |
| C | 0.72985  | 2.49161  | 0.28064  |
| H | 1.44060  | 1.66077  | 0.36225  |
| C | -2.49670 | -1.45816 | -0.30986 |
| H | -1.61259 | -2.04156 | -0.02103 |
| C | 0.97231  | 3.46017  | 1.43022  |
| H | 0.74217  | 3.02739  | 2.41318  |
| H | 2.02708  | 3.77345  | 1.44568  |
| H | 0.36744  | 4.37397  | 1.32361  |
| C | 1.01611  | 3.17686  | -1.05406 |
| H | 0.78222  | 2.51879  | -1.89836 |
| H | 0.42666  | 4.10075  | -1.16515 |
| H | 2.08023  | 3.44900  | -1.12460 |
| C | -3.66586 | -1.99343 | 0.50509  |
| H | -3.76961 | -3.07835 | 0.35858  |
| H | -3.53435 | -1.81410 | 1.58198  |
| H | -4.62177 | -1.53819 | 0.20608  |
| C | -2.71228 | -1.68753 | -1.80399 |
| H | -3.61376 | -1.16588 | -2.16132 |
| H | -1.86393 | -1.32298 | -2.40173 |
| H | -2.84178 | -2.75846 | -2.02054 |
| C | 0.69932  | -1.10215 | -0.59792 |
| H | 0.37185  | -0.94483 | -1.62793 |
| F | 3.57357  | 0.87686  | 0.12638  |
| H | 3.02884  | 0.73304  | -0.68264 |
| F | 2.26356  | 0.44672  | -1.81732 |
| H | 1.15043  | 0.57270  | -2.64271 |

F 0.31311 0.58144 -3.16642

**Method M06-2X/ def2-TZVPD**

1A:  $\Delta G = -2456241.1$  kJ/mol

|   |          |          |          |
|---|----------|----------|----------|
| C | 1.11587  | 0.49390  | 1.46002  |
| C | 2.46730  | 1.08116  | 1.01911  |
| C | 2.71704  | 0.63291  | -0.43053 |
| N | 0.47877  | 0.21573  | 0.13859  |
| H | 2.40885  | 2.18087  | 1.04605  |
| H | 3.28417  | 0.78794  | 1.69574  |
| C | 0.32353  | 1.49418  | 2.29381  |
| H | -0.68438 | 1.11541  | 2.52310  |
| H | 0.83054  | 1.66501  | 3.25493  |
| H | 0.22472  | 2.46796  | 1.79623  |
| C | 1.25906  | -0.78387 | 2.28607  |
| H | 1.65882  | -0.54704 | 3.28277  |
| H | 0.28010  | -1.26516 | 2.43514  |
| H | 1.93380  | -1.52001 | 1.83064  |
| C | 3.55388  | 1.64153  | -1.20393 |
| H | 4.57043  | 1.69063  | -0.78579 |
| H | 3.64860  | 1.35794  | -2.26311 |
| H | 3.12554  | 2.65093  | -1.16410 |
| C | 3.40093  | -0.73025 | -0.51084 |
| H | 3.50659  | -1.05822 | -1.55642 |
| H | 4.41035  | -0.67790 | -0.07718 |
| H | 2.85876  | -1.51901 | 0.02592  |
| C | -0.85032 | -0.28823 | -0.00507 |
| C | -1.06361 | -1.68790 | -0.10690 |
| C | -1.95685 | 0.59763  | -0.06802 |
| C | -2.37310 | -2.17372 | -0.20370 |
| C | -3.24894 | 0.06179  | -0.15700 |
| C | -3.46354 | -1.31064 | -0.21063 |
| H | -2.53650 | -3.25252 | -0.28533 |
| H | -4.10413 | 0.74275  | -0.20401 |
| H | -4.48008 | -1.70703 | -0.27946 |
| C | -1.80659 | 2.10441  | -0.13634 |
| H | -0.74533 | 2.33618  | 0.01706  |
| C | 0.08040  | -2.67533 | -0.19846 |
| H | 0.99887  | -2.12758 | 0.04480  |
| C | -2.62437 | 2.83289  | 0.92265  |
| H | -2.40198 | 2.48110  | 1.94026  |
| H | -2.42054 | 3.91402  | 0.89532  |
| H | -3.70679 | 2.70922  | 0.76213  |
| C | -2.17505 | 2.60491  | -1.53076 |
| H | -1.58226 | 2.10841  | -2.31139 |
| H | -3.23933 | 2.42936  | -1.75513 |
| H | -1.99770 | 3.68786  | -1.61837 |
| C | -0.04873 | -3.83165 | 0.78381  |
| H | 0.84655  | -4.47066 | 0.75205  |
| H | -0.16999 | -3.48351 | 1.82008  |

|   |          |          |          |
|---|----------|----------|----------|
| H | -0.90972 | -4.47708 | 0.55042  |
| C | 0.22890  | -3.19174 | -1.62715 |
| H | -0.65475 | -3.77051 | -1.94045 |
| H | 0.35750  | -2.37179 | -2.34937 |
| H | 1.10349  | -3.85418 | -1.71782 |
| C | 1.28156  | 0.52034  | -0.95797 |
| H | 1.15700  | -0.18823 | -1.79512 |
| F | 0.90813  | 1.78897  | -1.56099 |

**1Ba:**  $\Delta G = -2456224.3$  kJ/mol

|   |          |          |          |
|---|----------|----------|----------|
| C | -1.30907 | -0.17973 | 1.59958  |
| C | -2.71333 | -0.57651 | 1.12165  |
| C | -2.79599 | -0.25230 | -0.38565 |
| N | -0.58151 | -0.09005 | 0.25340  |
| H | -2.85886 | -1.65625 | 1.27284  |
| H | -3.49198 | -0.06249 | 1.70140  |
| C | -0.66593 | -1.22031 | 2.49654  |
| H | 0.38051  | -0.97482 | 2.72888  |
| H | -1.21315 | -1.24274 | 3.44884  |
| H | -0.71055 | -2.23069 | 2.07204  |
| C | -1.26249 | 1.17871  | 2.28216  |
| H | -1.75007 | 1.09593  | 3.26291  |
| H | -0.22789 | 1.50779  | 2.45809  |
| H | -1.79054 | 1.95553  | 1.71432  |
| C | -3.45773 | -1.36543 | -1.19358 |
| H | -4.49768 | -1.50279 | -0.86403 |
| H | -3.47187 | -1.12680 | -2.26647 |
| H | -2.93486 | -2.32454 | -1.06496 |
| C | -3.48377 | 1.08716  | -0.67725 |
| H | -3.42633 | 1.34008  | -1.74573 |
| H | -4.54613 | 1.02381  | -0.40124 |
| H | -3.03534 | 1.91439  | -0.10949 |
| C | 0.85201  | 0.05586  | 0.17161  |
| C | 1.40970  | 1.34768  | 0.13193  |
| C | 1.63686  | -1.11319 | 0.13344  |
| C | 2.80633  | 1.44473  | 0.16994  |
| C | 3.02674  | -0.95724 | 0.17182  |
| C | 3.60638  | 0.30769  | 0.21854  |
| H | 3.27217  | 2.43300  | 0.13625  |
| H | 3.66493  | -1.84395 | 0.14101  |
| H | 4.69398  | 0.40768  | 0.25561  |
| C | 1.02623  | -2.47652 | -0.11957 |
| H | -0.03982 | -2.43492 | 0.15046  |
| C | 0.57262  | 2.58522  | -0.11974 |
| H | -0.47763 | 2.34328  | 0.09676  |
| C | 1.66103  | -3.59300 | 0.69314  |
| H | 1.63823  | -3.38379 | 1.77306  |
| H | 1.12817  | -4.54041 | 0.52683  |
| H | 2.71034  | -3.76541 | 0.41054  |
| C | 1.08843  | -2.75448 | -1.62224 |

|   |          |          |          |
|---|----------|----------|----------|
| H | 0.68110  | -1.90822 | -2.20029 |
| H | 2.13072  | -2.90566 | -1.94697 |
| H | 0.52757  | -3.66646 | -1.87819 |
| C | 0.95677  | 3.77081  | 0.75119  |
| H | 0.27449  | 4.61493  | 0.57408  |
| H | 0.91382  | 3.52884  | 1.82356  |
| H | 1.97293  | 4.13256  | 0.53335  |
| C | 0.64860  | 2.92125  | -1.60968 |
| H | 1.66305  | 3.25265  | -1.88492 |
| H | 0.40379  | 2.03973  | -2.22571 |
| H | -0.04448 | 3.73818  | -1.86331 |
| C | -1.36371 | -0.11729 | -0.77383 |
| H | -0.89198 | -0.03646 | -1.83478 |
| F | -0.00157 | 0.03885  | -3.02319 |

**1Bb:**  $\Delta G = -2456209.5$  kJ/mol

|   |          |          |          |
|---|----------|----------|----------|
| C | -0.74958 | -1.00051 | 1.39753  |
| C | -1.56136 | -2.21105 | 0.90257  |
| C | -1.71791 | -2.09558 | -0.63137 |
| N | -0.19288 | -0.47116 | 0.06284  |
| H | -1.02855 | -3.14000 | 1.15133  |
| H | -2.53676 | -2.25547 | 1.40434  |
| C | 0.38531  | -1.38154 | 2.32810  |
| H | 1.04259  | -0.52720 | 2.54602  |
| H | -0.05212 | -1.70399 | 3.28271  |
| H | 0.99027  | -2.21527 | 1.95063  |
| C | -1.61101 | 0.08135  | 2.02607  |
| H | -2.00795 | -0.32013 | 2.96993  |
| H | -1.00344 | 0.96227  | 2.28576  |
| H | -2.46064 | 0.39466  | 1.38185  |
| C | -1.33447 | -3.38457 | -1.35874 |
| H | -2.02272 | -4.18906 | -1.06324 |
| H | -1.40345 | -3.26564 | -2.44914 |
| H | -0.31230 | -3.70700 | -1.11064 |
| C | -3.10799 | -1.61825 | -1.06945 |
| H | -3.14697 | -1.49860 | -2.16296 |
| H | -3.84394 | -2.38951 | -0.79650 |
| H | -3.39052 | -0.65420 | -0.59554 |
| C | 0.82139  | 0.55452  | -0.03185 |
| C | 0.42776  | 1.90340  | -0.12249 |
| C | 2.16959  | 0.14452  | -0.06276 |
| C | 1.44790  | 2.86273  | -0.15832 |
| C | 3.14278  | 1.14905  | -0.10372 |
| C | 2.78869  | 2.49467  | -0.13040 |
| H | 1.17621  | 3.91938  | -0.22837 |
| H | 4.19789  | 0.86546  | -0.13304 |
| H | 3.56632  | 3.26196  | -0.15673 |
| C | 2.58675  | -1.30953 | -0.16786 |
| H | 1.71809  | -1.94066 | 0.07129  |
| C | -1.01206 | 2.32972  | -0.28586 |

|   |          |          |          |
|---|----------|----------|----------|
| H | -1.69774 | 1.49761  | -0.06921 |
| C | 3.69992  | -1.67623 | 0.80301  |
| H | 3.43893  | -1.42758 | 1.84190  |
| H | 3.90821  | -2.75499 | 0.76048  |
| H | 4.64083  | -1.15839 | 0.56411  |
| C | 2.97818  | -1.63030 | -1.60826 |
| H | 2.15820  | -1.41947 | -2.31096 |
| H | 3.84901  | -1.03735 | -1.92821 |
| H | 3.24348  | -2.69266 | -1.71346 |
| C | -1.41171 | 3.45917  | 0.65403  |
| H | -2.50213 | 3.59653  | 0.61419  |
| H | -1.14833 | 3.23991  | 1.69958  |
| H | -0.94397 | 4.42021  | 0.38854  |
| C | -1.28884 | 2.70958  | -1.73866 |
| H | -0.72184 | 3.60103  | -2.05213 |
| H | -1.03199 | 1.89325  | -2.43124 |
| H | -2.35981 | 2.92684  | -1.87030 |
| C | -0.73597 | -1.03459 | -0.95577 |
| H | -0.46190 | -0.72292 | -1.97018 |
| F | -3.77854 | 1.07330  | 0.17494  |

**2a:**  $\Delta G = -2720017.5$  kJ/mol

|   |          |          |          |
|---|----------|----------|----------|
| C | 0.82811  | -0.69500 | 1.49924  |
| C | 2.08713  | -1.46559 | 1.06945  |
| C | 1.87569  | -1.93231 | -0.38122 |
| N | 0.24587  | -0.33487 | 0.16094  |
| H | 2.94884  | -0.78154 | 1.09461  |
| H | 2.31163  | -2.29962 | 1.75032  |
| C | 1.18223  | 0.53114  | 2.32927  |
| H | 0.29511  | 1.15092  | 2.52912  |
| H | 1.57904  | 0.21146  | 3.30364  |
| H | 1.94902  | 1.15262  | 1.84958  |
| C | -0.15467 | -1.54022 | 2.30511  |
| H | 0.25473  | -1.73226 | 3.30695  |
| H | -1.11019 | -1.01078 | 2.44062  |
| H | -0.36594 | -2.51460 | 1.84721  |
| C | 3.18617  | -2.02843 | -1.15040 |
| H | 3.79247  | -2.85375 | -0.74909 |
| H | 3.01333  | -2.23572 | -2.21676 |
| H | 3.78392  | -1.11192 | -1.07594 |
| C | 1.16686  | -3.28474 | -0.47058 |
| H | 0.96606  | -3.55606 | -1.51814 |
| H | 1.80298  | -4.07125 | -0.03991 |
| H | 0.20986  | -3.31217 | 0.06529  |
| C | -0.94485 | 0.44857  | -0.00353 |
| C | -2.19754 | -0.20058 | -0.13788 |
| C | -0.86690 | 1.86261  | -0.05609 |
| C | -3.35262 | 0.58054  | -0.26593 |
| C | -2.05240 | 2.59864  | -0.17838 |
| C | -3.28870 | 1.96955  | -0.27032 |

|   |          |          |          |
|---|----------|----------|----------|
| H | -4.32095 | 0.08345  | -0.37478 |
| H | -1.99636 | 3.69049  | -0.21921 |
| H | -4.20239 | 2.56208  | -0.36528 |
| C | 0.44859  | 2.61061  | -0.07295 |
| H | 1.23984  | 1.88200  | 0.12640  |
| C | -2.33088 | -1.70603 | -0.22870 |
| H | -1.35804 | -2.13754 | 0.03513  |
| C | 0.53334  | 3.70248  | 0.98518  |
| H | 0.31749  | 3.32606  | 1.99537  |
| H | 1.54306  | 4.14038  | 1.00497  |
| H | -0.16917 | 4.52624  | 0.78401  |
| C | 0.72064  | 3.18861  | -1.45898 |
| H | 0.66105  | 2.41920  | -2.24062 |
| H | 0.00370  | 3.98522  | -1.71426 |
| H | 1.73005  | 3.62646  | -1.50307 |
| C | -3.36400 | -2.27012 | 0.73747  |
| H | -3.35918 | -3.37007 | 0.71137  |
| H | -3.17096 | -1.96265 | 1.77564  |
| H | -4.38581 | -1.94924 | 0.48273  |
| C | -2.63709 | -2.13228 | -1.66190 |
| H | -3.61568 | -1.75152 | -1.99508 |
| H | -1.88204 | -1.76292 | -2.37165 |
| H | -2.66515 | -3.22928 | -1.74810 |
| C | 0.93411  | -0.84937 | -0.89878 |
| H | 0.32567  | -1.09640 | -1.77938 |
| F | 1.82751  | 0.25220  | -1.57393 |
| H | 2.91245  | 0.97250  | -0.69851 |
| F | 3.57261  | 1.41733  | -0.17721 |

**2Ba'**:  $\Delta G = -2720064.5$  kJ/mol

|   |         |          |          |
|---|---------|----------|----------|
| C | 1.63025 | -0.12724 | -1.60520 |
| C | 2.96886 | -0.47187 | -0.93126 |
| C | 2.82649 | -0.15369 | 0.57285  |
| N | 0.71392 | -0.06262 | -0.37779 |
| H | 3.17806 | -1.54380 | -1.06069 |
| H | 3.79941 | 0.07698  | -1.39477 |
| C | 1.15148 | -1.18892 | -2.57669 |
| H | 0.12874 | -0.99135 | -2.92902 |
| H | 1.80726 | -1.17258 | -3.45755 |
| H | 1.19616 | -2.20088 | -2.15632 |
| C | 1.63688 | 1.22891  | -2.29381 |
| H | 2.26297 | 1.15799  | -3.19328 |
| H | 0.62887 | 1.52581  | -2.61829 |
| H | 2.05681 | 2.02107  | -1.66095 |
| C | 3.39555 | -1.24737 | 1.47377  |
| H | 4.48073 | -1.33265 | 1.32055  |
| H | 3.21865 | -1.01908 | 2.53449  |
| H | 2.94594 | -2.22704 | 1.25585  |
| C | 3.40836 | 1.20884  | 0.96969  |
| H | 3.17161 | 1.45048  | 2.01589  |



|   |          |          |          |
|---|----------|----------|----------|
| H | 4.50238  | 1.18457  | 0.86576  |
| H | 3.02542  | 2.02245  | 0.33771  |
| C | -0.72508 | 0.01538  | -0.47453 |
| C | -1.34260 | 1.27950  | -0.50090 |
| C | -1.45145 | -1.19104 | -0.50006 |
| C | -2.72980 | 1.30887  | -0.69076 |
| C | -2.83446 | -1.10133 | -0.68789 |
| C | -3.46405 | 0.13417  | -0.81173 |
| H | -3.24356 | 2.27307  | -0.71634 |
| H | -3.43176 | -2.01592 | -0.71214 |
| H | -4.54514 | 0.18092  | -0.96394 |
| C | -0.80691 | -2.52145 | -0.16758 |
| H | 0.27177  | -2.44617 | -0.37157 |
| C | -0.59470 | 2.55608  | -0.17676 |
| H | 0.48089  | 2.36815  | -0.29825 |
| C | -1.34255 | -3.68180 | -0.99041 |
| H | -1.26394 | -3.49102 | -2.07097 |
| H | -0.77707 | -4.59909 | -0.77252 |
| H | -2.39748 | -3.89945 | -0.76646 |
| C | -0.95230 | -2.77771 | 1.33165  |
| H | -0.54563 | -1.95046 | 1.93020  |
| H | -2.01208 | -2.88353 | 1.61318  |
| H | -0.43333 | -3.70320 | 1.62278  |
| C | -0.95832 | 3.71801  | -1.08762 |
| H | -0.33193 | 4.59320  | -0.86266 |
| H | -0.81407 | 3.47008  | -2.14965 |
| H | -2.00439 | 4.03440  | -0.95952 |
| C | -0.81425 | 2.90243  | 1.29562  |
| H | -1.87833 | 3.09759  | 1.50385  |
| H | -0.49629 | 2.08510  | 1.95986  |
| H | -0.25031 | 3.80708  | 1.56942  |
| C | 1.35167  | -0.07638 | 0.74124  |
| H | 0.81124  | -0.00509 | 1.72929  |
| F | 0.04363  | 0.14192  | 3.18294  |
| H | -1.23794 | 0.08129  | 2.82397  |
| F | -2.20136 | 0.03687  | 2.52138  |

**2Bb:**  $\Delta G = -2720054.7$  kJ/mol

|   |          |          |          |
|---|----------|----------|----------|
| C | -0.63994 | -0.96257 | 1.26308  |
| C | -1.63718 | -1.98484 | 0.68071  |
| C | -1.50405 | -1.97460 | -0.86107 |
| N | 0.05396  | -0.45752 | -0.01361 |
| H | -1.42960 | -2.98679 | 1.07944  |
| H | -2.65923 | -1.70873 | 0.97210  |
| C | 0.39400  | -1.58382 | 2.18309  |
| H | 1.18217  | -0.86796 | 2.45867  |
| H | -0.11070 | -1.88691 | 3.11023  |
| H | 0.85665  | -2.48144 | 1.75309  |
| C | -1.33439 | 0.19947  | 1.94934  |
| H | -1.76635 | -0.17301 | 2.88860  |

|   |          |          |          |
|---|----------|----------|----------|
| H | -0.63067 | 1.00438  | 2.20781  |
| H | -2.15963 | 0.59426  | 1.34316  |
| C | -1.08882 | -3.32829 | -1.43948 |
| H | -1.88045 | -4.06521 | -1.24449 |
| H | -0.93921 | -3.27288 | -2.52699 |
| H | -0.16053 | -3.70018 | -0.98182 |
| C | -2.76442 | -1.45002 | -1.55706 |
| H | -2.61120 | -1.34970 | -2.64134 |
| H | -3.58527 | -2.16359 | -1.39478 |
| H | -3.07457 | -0.48057 | -1.14063 |
| C | 1.11953  | 0.52163  | -0.01167 |
| C | 0.78035  | 1.88593  | -0.11165 |
| C | 2.45132  | 0.06623  | 0.05140  |
| C | 1.82986  | 2.81045  | -0.05687 |
| C | 3.45705  | 1.03875  | 0.10190  |
| C | 3.15162  | 2.39539  | 0.06887  |
| H | 1.60061  | 3.87649  | -0.13351 |
| H | 4.50131  | 0.71942  | 0.14895  |
| H | 3.95413  | 3.13560  | 0.11363  |
| C | 2.83218  | -1.39734 | -0.05028 |
| H | 1.92505  | -2.00356 | 0.08068  |
| C | -0.63057 | 2.35918  | -0.38267 |
| H | -1.33271 | 1.53881  | -0.19289 |
| C | 3.82715  | -1.82600 | 1.01855  |
| H | 3.46710  | -1.59907 | 2.03233  |
| H | 4.00740  | -2.90929 | 0.96370  |
| H | 4.80252  | -1.33242 | 0.89356  |
| C | 3.36121  | -1.69544 | -1.45107 |
| H | 2.62778  | -1.43612 | -2.22903 |
| H | 4.28129  | -1.12857 | -1.66164 |
| H | 3.59882  | -2.76404 | -1.55883 |
| C | -1.05958 | 3.51348  | 0.51136  |
| H | -2.13052 | 3.71552  | 0.36844  |
| H | -0.90623 | 3.28839  | 1.57718  |
| H | -0.51596 | 4.44391  | 0.28641  |
| C | -0.79336 | 2.71656  | -1.85762 |
| H | -0.16638 | 3.57617  | -2.14301 |
| H | -0.52238 | 1.87636  | -2.51500 |
| H | -1.84080 | 2.97844  | -2.06990 |
| C | -0.41320 | -0.99819 | -1.08045 |
| H | -0.00696 | -0.72394 | -2.06075 |
| F | -3.63505 | 1.39457  | -0.16986 |
| H | -4.07780 | 0.45245  | 0.48985  |
| F | -4.44361 | -0.37227 | 1.06003  |

**2Aa:**  $\Delta G = -2720016.1$  kJ/mol

|   |          |          |         |
|---|----------|----------|---------|
| C | -0.95053 | 0.16572  | 1.79668 |
| C | -2.44842 | -0.11520 | 1.56115 |
| C | -2.72296 | 0.05469  | 0.05597 |
| N | -0.40804 | 0.04936  | 0.39748 |

|   |          |          |          |
|---|----------|----------|----------|
| H | -2.67396 | -1.15253 | 1.85156  |
| H | -3.08584 | 0.53634  | 2.17651  |
| C | -0.32938 | -0.86470 | 2.72922  |
| H | 0.76035  | -0.73115 | 2.80742  |
| H | -0.74514 | -0.74610 | 3.74022  |
| H | -0.53431 | -1.89424 | 2.40730  |
| C | -0.68171 | 1.55287  | 2.37103  |
| H | -0.99607 | 1.58331  | 3.42375  |
| H | 0.39234  | 1.79229  | 2.34548  |
| H | -1.22454 | 2.35019  | 1.84771  |
| C | -3.83225 | -0.85386 | -0.45503 |
| H | -4.80580 | -0.51536 | -0.07144 |
| H | -3.88436 | -0.83361 | -1.55444 |
| H | -3.69046 | -1.89610 | -0.14645 |
| C | -3.07342 | 1.49751  | -0.31254 |
| H | -3.13454 | 1.62558  | -1.40391 |
| H | -4.05438 | 1.76128  | 0.10797  |
| H | -2.35211 | 2.23109  | 0.06857  |
| C | 0.98049  | 0.21553  | 0.06896  |
| C | 1.45125  | 1.49873  | -0.30771 |
| C | 1.86830  | -0.88728 | 0.10462  |
| C | 2.81385  | 1.66558  | -0.58093 |
| C | 3.22380  | -0.66535 | -0.17450 |
| C | 3.70137  | 0.59828  | -0.49970 |
| H | 3.18085  | 2.65266  | -0.87580 |
| H | 3.91451  | -1.51315 | -0.15150 |
| H | 4.76330  | 0.74791  | -0.71139 |
| C | 1.41474  | -2.31480 | 0.33025  |
| H | 0.36386  | -2.28768 | 0.63791  |
| C | 0.52103  | 2.67459  | -0.51587 |
| H | -0.44147 | 2.41145  | -0.06402 |
| C | 2.21442  | -3.03075 | 1.41051  |
| H | 2.20965  | -2.48287 | 2.36413  |
| H | 1.79635  | -4.03031 | 1.60231  |
| H | 3.26649  | -3.17635 | 1.12053  |
| C | 1.46721  | -3.08689 | -0.98616 |
| H | 0.86442  | -2.60225 | -1.76662 |
| H | 2.49887  | -3.17504 | -1.36264 |
| H | 1.07735  | -4.10824 | -0.85633 |
| C | 1.00770  | 3.95380  | 0.14996  |
| H | 0.24845  | 4.74557  | 0.06603  |
| H | 1.21722  | 3.80823  | 1.21999  |
| H | 1.92547  | 4.34291  | -0.31686 |
| C | 0.26718  | 2.89181  | -2.00509 |
| H | 1.19179  | 3.17095  | -2.53499 |
| H | -0.12846 | 1.98616  | -2.48844 |
| H | -0.46233 | 3.70024  | -2.16633 |
| C | -1.35388 | -0.27960 | -0.51492 |
| H | -1.13665 | 0.00925  | -1.55180 |
| F | -1.38725 | -1.87632 | -0.73699 |

|   |          |          |          |
|---|----------|----------|----------|
| H | -1.43127 | -2.03744 | -2.27244 |
| F | -1.42009 | -1.97287 | -3.22187 |

**2Ba:**  $\Delta G = -2720061.4$  kJ/mol

|   |          |          |          |
|---|----------|----------|----------|
| C | 0.61848  | -0.88233 | -1.93472 |
| C | 1.94409  | -1.60342 | -1.63588 |
| C | 2.45293  | -1.09605 | -0.26961 |
| N | 0.26347  | -0.37416 | -0.53148 |
| H | 1.76516  | -2.68700 | -1.57958 |
| H | 2.67597  | -1.43695 | -2.43746 |
| C | -0.46321 | -1.80987 | -2.45341 |
| H | -1.43688 | -1.30438 | -2.52936 |
| H | -0.18504 | -2.13250 | -3.46581 |
| H | -0.57315 | -2.71354 | -1.84178 |
| C | 0.76523  | 0.30652  | -2.87186 |
| H | 0.95653  | -0.07072 | -3.88525 |
| H | -0.15630 | 0.90529  | -2.91321 |
| H | 1.60246  | 0.96163  | -2.60025 |
| C | 2.98397  | -2.20166 | 0.63740  |
| H | 3.86892  | -2.66908 | 0.18319  |
| H | 3.27612  | -1.79197 | 1.61449  |
| H | 2.23206  | -2.98684 | 0.80293  |
| C | 3.49075  | 0.03029  | -0.38332 |
| H | 3.68663  | 0.47139  | 0.60357  |
| H | 4.43053  | -0.37999 | -0.77964 |
| H | 3.15755  | 0.82998  | -1.05952 |
| C | -0.99143 | 0.26250  | -0.20931 |
| C | -1.07167 | 1.66727  | -0.28164 |
| C | -2.06611 | -0.54523 | 0.20697  |
| C | -2.32226 | 2.24699  | -0.03747 |
| C | -3.29132 | 0.08951  | 0.44001  |
| C | -3.42624 | 1.46659  | 0.29251  |
| H | -2.42354 | 3.33406  | -0.08551 |
| H | -4.14669 | -0.50705 | 0.76726  |
| H | -4.39364 | 1.94152  | 0.47309  |
| C | -1.88999 | -2.00871 | 0.55702  |
| H | -0.93858 | -2.35654 | 0.12807  |
| C | 0.15166  | 2.54375  | -0.46253 |
| H | 0.96047  | 1.92962  | -0.88196 |
| C | -2.99542 | -2.89781 | 0.00927  |
| H | -3.10778 | -2.79395 | -1.07989 |
| H | -2.78057 | -3.95492 | 0.22236  |
| H | -3.97033 | -2.67218 | 0.46681  |
| C | -1.75977 | -2.13886 | 2.07445  |
| H | -0.96305 | -1.49103 | 2.47164  |
| H | -2.69751 | -1.85305 | 2.57676  |
| H | -1.53524 | -3.17744 | 2.36004  |
| C | -0.07291 | 3.70652  | -1.41633 |
| H | 0.86502  | 4.25758  | -1.57630 |
| H | -0.43289 | 3.37035  | -2.39992 |

|   |          |          |          |
|---|----------|----------|----------|
| H | -0.80361 | 4.42941  | -1.02365 |
| C | 0.63269  | 3.02231  | 0.90753  |
| H | -0.10695 | 3.69278  | 1.37353  |
| H | 0.79837  | 2.18342  | 1.59991  |
| H | 1.57536  | 3.58288  | 0.81447  |
| C | 1.22672  | -0.49751 | 0.31275  |
| H | 1.07965  | -0.15709 | 1.36215  |
| F | 0.55857  | 0.32220  | 2.98633  |
| H | 1.82575  | 0.54952  | 2.94352  |
| F | 2.83629  | 0.71681  | 2.81419  |

**2Bc:**  $\Delta G = -2720057.3$  kJ/mol

|   |          |          |          |
|---|----------|----------|----------|
| C | 0.18331  | 1.20597  | 1.30357  |
| C | 0.46386  | 2.64910  | 0.84381  |
| C | 0.57399  | 2.62325  | -0.69672 |
| N | -0.28131 | 0.57713  | -0.00618 |
| H | -0.36875 | 3.28987  | 1.13634  |
| H | 1.37241  | 3.03161  | 1.30641  |
| C | -0.89871 | 1.11543  | 2.36542  |
| H | -1.16308 | 0.07783  | 2.57634  |
| H | -0.49697 | 1.55352  | 3.27988  |
| H | -1.79183 | 1.67261  | 2.09083  |
| C | 1.43582  | 0.48322  | 1.78214  |
| H | 1.73524  | 0.93125  | 2.73016  |
| H | 1.23932  | -0.57671 | 1.95331  |
| H | 2.26151  | 0.58897  | 1.08004  |
| C | -0.19975 | 3.75881  | -1.36710 |
| H | 0.23595  | 4.71151  | -1.06218 |
| H | -0.13773 | 3.68164  | -2.45359 |
| H | -1.24995 | 3.74878  | -1.07126 |
| C | 2.02264  | 2.59777  | -1.20775 |
| H | 2.04674  | 2.45336  | -2.28927 |
| H | 2.48637  | 3.55782  | -0.97583 |
| H | 2.60715  | 1.80597  | -0.73700 |
| C | -0.88364 | -0.73735 | -0.09740 |
| C | -0.06064 | -1.84448 | -0.33506 |
| C | -2.27573 | -0.83003 | 0.02311  |
| C | -0.67486 | -3.09480 | -0.37116 |
| C | -2.83438 | -2.10485 | -0.02002 |
| C | -2.04237 | -3.22758 | -0.19641 |
| H | -0.07146 | -3.97389 | -0.55878 |
| H | -3.90832 | -2.21415 | 0.06668  |
| H | -2.49696 | -4.20993 | -0.22502 |
| C | -3.18927 | 0.37841  | 0.09031  |
| H | -2.58609 | 1.27587  | 0.21709  |
| C | 1.41618  | -1.73249 | -0.65756 |
| H | 1.75947  | -0.72547 | -0.43261 |
| C | -4.17216 | 0.29768  | 1.25764  |
| H | -3.65834 | 0.13067  | 2.20541  |
| H | -4.73590 | 1.22917  | 1.33235  |

|   |          |          |          |
|---|----------|----------|----------|
| H | -4.88822 | -0.51313 | 1.11190  |
| C | -3.93870 | 0.52783  | -1.23729 |
| H | -3.24401 | 0.63230  | -2.07309 |
| H | -4.56949 | -0.34383 | -1.42436 |
| H | -4.57791 | 1.41219  | -1.20885 |
| C | 2.26810  | -2.70472 | 0.15611  |
| H | 3.32454  | -2.52796 | -0.05076 |
| H | 2.10445  | -2.58438 | 1.22844  |
| H | 2.04820  | -3.74080 | -0.10794 |
| C | 1.63188  | -1.95365 | -2.15784 |
| H | 1.32340  | -2.96019 | -2.44940 |
| H | 1.06034  | -1.23591 | -2.74986 |
| H | 2.68934  | -1.83593 | -2.40309 |
| C | -0.05364 | 1.31537  | -1.01929 |
| H | -0.29923 | 0.96986  | -2.01934 |
| F | 4.32448  | 0.02962  | -0.38301 |
| H | 4.45840  | -0.25440 | 0.71095  |
| F | 4.60231  | -0.52433 | 1.79750  |

**2Bd:**  $\Delta G = -2720053.8$  kJ/mol

|   |          |          |          |
|---|----------|----------|----------|
| C | -0.09938 | -1.27116 | 1.39170  |
| C | -0.69639 | -2.60103 | 0.89351  |
| C | -1.07584 | -2.40462 | -0.59068 |
| N | 0.20122  | -0.57900 | 0.06616  |
| H | 0.05460  | -3.38719 | 0.97675  |
| H | -1.55965 | -2.88500 | 1.49363  |
| C | 1.16261  | -1.46019 | 2.21622  |
| H | 1.63981  | -0.50489 | 2.44072  |
| H | 0.86699  | -1.91851 | 3.16092  |
| H | 1.87694  | -2.12290 | 1.73251  |
| C | -1.09039 | -0.41378 | 2.16748  |
| H | -1.28285 | -0.90957 | 3.11971  |
| H | -0.66471 | 0.56900  | 2.37936  |
| H | -2.03970 | -0.29362 | 1.64591  |
| C | -0.59788 | -3.55005 | -1.48507 |
| H | -1.09058 | -4.47186 | -1.17245 |
| H | -0.85223 | -3.35786 | -2.52857 |
| H | 0.48134  | -3.68972 | -1.40447 |
| C | -2.57484 | -2.15774 | -0.80899 |
| H | -2.77029 | -1.82497 | -1.82992 |
| H | -3.10424 | -3.09831 | -0.64681 |
| H | -2.97529 | -1.41797 | -0.11430 |
| C | 0.96575  | 0.64676  | -0.03275 |
| C | 0.28757  | 1.87140  | -0.02792 |
| C | 2.35742  | 0.54191  | -0.15141 |
| C | 1.06921  | 3.02564  | -0.04768 |
| C | 3.08609  | 1.72767  | -0.17117 |
| C | 2.45147  | 2.95720  | -0.09556 |
| H | 0.58312  | 3.99309  | -0.04913 |
| H | 4.16393  | 1.68503  | -0.26652 |

|   |          |          |          |
|---|----------|----------|----------|
| H | 3.03650  | 3.86823  | -0.10677 |
| C | 3.07404  | -0.77642 | -0.37161 |
| H | 2.37452  | -1.59417 | -0.20614 |
| C | -1.22123 | 2.00041  | -0.13592 |
| H | -1.67968 | 1.02146  | 0.00512  |
| C | 4.25749  | -0.96339 | 0.57622  |
| H | 3.96006  | -0.84576 | 1.61912  |
| H | 4.67814  | -1.96251 | 0.45001  |
| H | 5.04859  | -0.24179 | 0.36463  |
| C | 3.52991  | -0.86943 | -1.83116 |
| H | 2.68311  | -0.78516 | -2.51524 |
| H | 4.23880  | -0.07233 | -2.06537 |
| H | 4.02145  | -1.82759 | -2.00981 |
| C | -1.80885 | 2.94820  | 0.90842  |
| H | -2.89546 | 2.97258  | 0.81054  |
| H | -1.56487 | 2.63265  | 1.92393  |
| H | -1.44105 | 3.96631  | 0.76914  |
| C | -1.57686 | 2.47667  | -1.54857 |
| H | -1.12968 | 3.45325  | -1.74679 |
| H | -1.21768 | 1.77563  | -2.30471 |
| H | -2.65863 | 2.57195  | -1.65272 |
| C | -0.33365 | -1.16302 | -0.93157 |
| H | -0.23823 | -0.74673 | -1.93041 |
| F | -4.18501 | 0.40857  | 1.13948  |
| H | -4.39791 | 0.56875  | 0.03299  |
| F | -4.61070 | 0.72342  | -1.06382 |

**3Ba:**  $\Delta G = -2983851.2$  kJ/mol

|   |          |          |          |
|---|----------|----------|----------|
| C | -1.30907 | -0.17973 | 1.59958  |
| C | -2.71333 | -0.57651 | 1.12165  |
| C | -2.79599 | -0.25230 | -0.38565 |
| N | -0.58151 | -0.09005 | 0.25340  |
| H | -2.85886 | -1.65625 | 1.27284  |
| H | -3.49198 | -0.06249 | 1.70140  |
| C | -0.66593 | -1.22031 | 2.49654  |
| H | 0.38051  | -0.97482 | 2.72888  |
| H | -1.21315 | -1.24274 | 3.44884  |
| H | -0.71055 | -2.23069 | 2.07204  |
| C | -1.26249 | 1.17871  | 2.28216  |
| H | -1.75007 | 1.09593  | 3.26291  |
| H | -0.22789 | 1.50779  | 2.45809  |
| H | -1.79054 | 1.95553  | 1.71432  |
| C | -3.45773 | -1.36543 | -1.19358 |
| H | -4.49768 | -1.50279 | -0.86403 |
| H | -3.47187 | -1.12680 | -2.26647 |
| H | -2.93486 | -2.32454 | -1.06496 |
| C | -3.48377 | 1.08716  | -0.67725 |
| H | -3.42633 | 1.34008  | -1.74573 |
| H | -4.54613 | 1.02381  | -0.40124 |
| H | -3.03534 | 1.91439  | -0.10949 |

|   |          |          |          |
|---|----------|----------|----------|
| C | 0.85201  | 0.05586  | 0.17161  |
| C | 1.40970  | 1.34768  | 0.13193  |
| C | 1.63686  | -1.11319 | 0.13344  |
| C | 2.80633  | 1.44473  | 0.16994  |
| C | 3.02674  | -0.95724 | 0.17182  |
| C | 3.60638  | 0.30769  | 0.21854  |
| H | 3.27217  | 2.43300  | 0.13625  |
| H | 3.66493  | -1.84395 | 0.14101  |
| H | 4.69398  | 0.40768  | 0.25561  |
| C | 1.02623  | -2.47652 | -0.11957 |
| H | -0.03982 | -2.43492 | 0.15046  |
| C | 0.57262  | 2.58522  | -0.11974 |
| H | -0.47763 | 2.34328  | 0.09676  |
| C | 1.66103  | -3.59300 | 0.69314  |
| H | 1.63823  | -3.38379 | 1.77306  |
| H | 1.12817  | -4.54041 | 0.52683  |
| H | 2.71034  | -3.76541 | 0.41054  |
| C | 1.08843  | -2.75448 | -1.62224 |
| H | 0.68110  | -1.90822 | -2.20029 |
| H | 2.13072  | -2.90566 | -1.94697 |
| H | 0.52757  | -3.66646 | -1.87819 |
| C | 0.95677  | 3.77081  | 0.75119  |
| H | 0.27449  | 4.61493  | 0.57408  |
| H | 0.91382  | 3.52884  | 1.82356  |
| H | 1.97293  | 4.13256  | 0.53335  |
| C | 0.64860  | 2.92125  | -1.60968 |
| H | 1.66305  | 3.25265  | -1.88492 |
| H | 0.40379  | 2.03973  | -2.22571 |
| H | -0.04448 | 3.73818  | -1.86331 |
| C | -1.36371 | -0.11729 | -0.77383 |
| H | -0.89198 | -0.03646 | -1.83478 |
| F | -0.00157 | 0.03885  | -3.02319 |

**3Bb:**  $\Delta G = -2983849.9$  kJ/mol

|   |          |          |          |
|---|----------|----------|----------|
| C | 0.62142  | -0.90599 | 1.74629  |
| C | 1.76961  | -1.84559 | 1.35108  |
| C | 1.59034  | -2.20373 | -0.13669 |
| N | 0.16680  | -0.41986 | 0.36136  |
| H | 2.72500  | -1.31771 | 1.47775  |
| H | 1.79462  | -2.73579 | 1.99376  |
| C | 1.08341  | 0.24897  | 2.60791  |
| H | 0.26546  | 0.95322  | 2.81471  |
| H | 1.41439  | -0.15487 | 3.57456  |
| H | 1.93036  | 0.78552  | 2.16342  |
| C | -0.54719 | -1.60997 | 2.41972  |
| H | -0.23956 | -1.90355 | 3.43221  |
| H | -1.41545 | -0.94300 | 2.52199  |
| H | -0.86181 | -2.52129 | 1.89609  |
| C | 2.91266  | -2.27880 | -0.89013 |
| H | 3.48680  | -3.14169 | -0.52335 |



|   |          |          |          |
|---|----------|----------|----------|
| H | 2.75237  | -2.41438 | -1.96860 |
| H | 3.50920  | -1.37311 | -0.74191 |
| C | 0.81729  | -3.51576 | -0.35573 |
| H | 0.57983  | -3.66459 | -1.41907 |
| H | 1.44482  | -4.35656 | -0.02864 |
| H | -0.12110 | -3.55899 | 0.21264  |
| C | -0.91882 | 0.52240  | 0.18298  |
| C | -2.21418 | 0.00779  | -0.04982 |
| C | -0.66537 | 1.90783  | 0.26000  |
| C | -3.27009 | 0.92334  | -0.12536 |
| C | -1.76305 | 2.77331  | 0.18458  |
| C | -3.05496 | 2.29017  | 0.01305  |
| H | -4.28133 | 0.55133  | -0.30847 |
| H | -1.58880 | 3.85139  | 0.23775  |
| H | -3.89715 | 2.98421  | -0.04145 |
| C | 0.72985  | 2.49161  | 0.28064  |
| H | 1.44060  | 1.66077  | 0.36225  |
| C | -2.49670 | -1.45816 | -0.30986 |
| H | -1.61259 | -2.04156 | -0.02103 |
| C | 0.97231  | 3.46017  | 1.43022  |
| H | 0.74217  | 3.02739  | 2.41318  |
| H | 2.02708  | 3.77345  | 1.44568  |
| H | 0.36744  | 4.37397  | 1.32361  |
| C | 1.01611  | 3.17686  | -1.05406 |
| H | 0.78222  | 2.51879  | -1.89836 |
| H | 0.42666  | 4.10075  | -1.16515 |
| H | 2.08023  | 3.44900  | -1.12460 |
| C | -3.66586 | -1.99343 | 0.50509  |
| H | -3.76961 | -3.07835 | 0.35858  |
| H | -3.53435 | -1.81410 | 1.58198  |
| H | -4.62177 | -1.53819 | 0.20608  |
| C | -2.71228 | -1.68753 | -1.80399 |
| H | -3.61376 | -1.16588 | -2.16132 |
| H | -1.86393 | -1.32298 | -2.40173 |
| H | -2.84178 | -2.75846 | -2.02054 |
| C | 0.69932  | -1.10215 | -0.59792 |
| H | 0.37185  | -0.94483 | -1.62793 |
| F | 3.57357  | 0.87686  | 0.12638  |
| H | 3.02884  | 0.73304  | -0.68264 |
| F | 2.26356  | 0.44672  | -1.81732 |
| H | 1.15043  | 0.57270  | -2.64271 |
| F | 0.31311  | 0.58144  | -3.16642 |

**3Bc:**  $\Delta G = -2983858.1$  kJ/mol

|   |         |          |          |
|---|---------|----------|----------|
| C | 0.62142 | -0.90599 | 1.74629  |
| C | 1.76961 | -1.84559 | 1.35108  |
| C | 1.59034 | -2.20373 | -0.13669 |
| N | 0.16680 | -0.41986 | 0.36136  |
| H | 2.72500 | -1.31771 | 1.47775  |
| H | 1.79462 | -2.73579 | 1.99376  |

|   |          |          |          |
|---|----------|----------|----------|
| C | 1.08341  | 0.24897  | 2.60791  |
| H | 0.26546  | 0.95322  | 2.81471  |
| H | 1.41439  | -0.15487 | 3.57456  |
| H | 1.93036  | 0.78552  | 2.16342  |
| C | -0.54719 | -1.60997 | 2.41972  |
| H | -0.23956 | -1.90355 | 3.43221  |
| H | -1.41545 | -0.94300 | 2.52199  |
| H | -0.86181 | -2.52129 | 1.89609  |
| C | 2.91266  | -2.27880 | -0.89013 |
| H | 3.48680  | -3.14169 | -0.52335 |
| H | 2.75237  | -2.41438 | -1.96860 |
| H | 3.50920  | -1.37311 | -0.74191 |
| C | 0.81729  | -3.51576 | -0.35573 |
| H | 0.57983  | -3.66459 | -1.41907 |
| H | 1.44482  | -4.35656 | -0.02864 |
| H | -0.12110 | -3.55899 | 0.21264  |
| C | -0.91882 | 0.52240  | 0.18298  |
| C | -2.21418 | 0.00779  | -0.04982 |
| C | -0.66537 | 1.90783  | 0.26000  |
| C | -3.27009 | 0.92334  | -0.12536 |
| C | -1.76305 | 2.77331  | 0.18458  |
| C | -3.05496 | 2.29017  | 0.01305  |
| H | -4.28133 | 0.55133  | -0.30847 |
| H | -1.58880 | 3.85139  | 0.23775  |
| H | -3.89715 | 2.98421  | -0.04145 |
| C | 0.72985  | 2.49161  | 0.28064  |
| H | 1.44060  | 1.66077  | 0.36225  |
| C | -2.49670 | -1.45816 | -0.30986 |
| H | -1.61259 | -2.04156 | -0.02103 |
| C | 0.97231  | 3.46017  | 1.43022  |
| H | 0.74217  | 3.02739  | 2.41318  |
| H | 2.02708  | 3.77345  | 1.44568  |
| H | 0.36744  | 4.37397  | 1.32361  |
| C | 1.01611  | 3.17686  | -1.05406 |
| H | 0.78222  | 2.51879  | -1.89836 |
| H | 0.42666  | 4.10075  | -1.16515 |
| H | 2.08023  | 3.44900  | -1.12460 |
| C | -3.66586 | -1.99343 | 0.50509  |
| H | -3.76961 | -3.07835 | 0.35858  |
| H | -3.53435 | -1.81410 | 1.58198  |
| H | -4.62177 | -1.53819 | 0.20608  |
| C | -2.71228 | -1.68753 | -1.80399 |
| H | -3.61376 | -1.16588 | -2.16132 |
| H | -1.86393 | -1.32298 | -2.40173 |
| H | -2.84178 | -2.75846 | -2.02054 |
| C | 0.69932  | -1.10215 | -0.59792 |
| H | 0.37185  | -0.94483 | -1.62793 |
| F | 3.57357  | 0.87686  | 0.12638  |
| H | 3.02884  | 0.73304  | -0.68264 |
| F | 2.26356  | 0.44672  | -1.81732 |

|   |         |         |          |
|---|---------|---------|----------|
| H | 1.15043 | 0.57270 | -2.64271 |
| F | 0.31311 | 0.58144 | -3.16642 |

**3Bd:**  $\Delta G = -2983848.8$  kJ/mol

|   |          |          |          |
|---|----------|----------|----------|
| C | -0.55587 | -0.23032 | 2.17561  |
| C | -1.94187 | -0.89419 | 2.13529  |
| C | -2.50320 | -0.72194 | 0.70946  |
| N | -0.25267 | -0.11750 | 0.67422  |
| H | -1.84000 | -1.96582 | 2.35826  |
| H | -2.60800 | -0.46632 | 2.89624  |
| C | 0.48994  | -1.08454 | 2.85932  |
| H | 1.48922  | -0.63023 | 2.79925  |
| H | 0.23147  | -1.16384 | 3.92397  |
| H | 0.52713  | -2.10214 | 2.45083  |
| C | -0.56424 | 1.16339  | 2.78342  |
| H | -0.70980 | 1.06705  | 3.86760  |
| H | 0.39282  | 1.68139  | 2.62611  |
| H | -1.37672 | 1.79190  | 2.39759  |
| C | -3.21079 | -1.96487 | 0.18282  |
| H | -4.12906 | -2.13407 | 0.76279  |
| H | -3.49141 | -1.84028 | -0.87232 |
| H | -2.57886 | -2.85699 | 0.26293  |
| C | -3.43922 | 0.49070  | 0.56528  |
| H | -3.69111 | 0.66955  | -0.48955 |
| H | -4.37183 | 0.28922  | 1.11081  |
| H | -3.00085 | 1.41113  | 0.97428  |
| C | 0.98686  | 0.43523  | 0.17187  |
| C | 1.01858  | 1.81398  | -0.13334 |
| C | 2.11172  | -0.39872 | 0.01703  |
| C | 2.25123  | 2.36286  | -0.50320 |
| C | 3.31878  | 0.21049  | -0.34761 |
| C | 3.39708  | 1.57814  | -0.58178 |
| H | 2.30660  | 3.42651  | -0.74690 |
| H | 4.20720  | -0.41353 | -0.47625 |
| H | 4.35106  | 2.03138  | -0.86169 |
| C | 2.04268  | -1.91161 | 0.06246  |
| H | 1.03092  | -2.20354 | 0.38366  |
| C | -0.22549 | 2.67833  | -0.18450 |
| H | -1.02540 | 2.17547  | 0.37570  |
| C | 3.05743  | -2.53657 | 1.00998  |
| H | 2.96641  | -2.16143 | 2.03858  |
| H | 2.93109  | -3.62860 | 1.04199  |
| H | 4.08925  | -2.34359 | 0.67907  |
| C | 2.23114  | -2.44744 | -1.35686 |
| H | 1.54714  | -1.96042 | -2.06350 |
| H | 3.26130  | -2.27798 | -1.70755 |
| H | 2.04170  | -3.53030 | -1.39350 |
| C | -0.03171 | 4.04671  | 0.45237  |
| H | -0.98567 | 4.59255  | 0.48255  |
| H | 0.34207  | 3.97240  | 1.48409  |

|   |          |          |          |
|---|----------|----------|----------|
| H | 0.67464  | 4.67192  | -0.11384 |
| C | -0.70432 | 2.80206  | -1.63006 |
| H | 0.04493  | 3.31520  | -2.25298 |
| H | -0.90311 | 1.82318  | -2.09003 |
| H | -1.63491 | 3.38731  | -1.68175 |
| C | -1.27549 | -0.39295 | -0.05852 |
| H | -1.20947 | -0.29973 | -1.14634 |
| F | -0.80638 | -2.70099 | -1.48612 |
| H | -0.60346 | -1.97441 | -2.12925 |
| F | -0.37202 | -0.85625 | -2.92893 |
| H | -1.64320 | -0.29818 | -3.02974 |
| F | -2.55303 | 0.08784  | -2.97993 |

**3Be:**  $\Delta G = -2983847.6$  kJ/mol

|   |          |          |          |
|---|----------|----------|----------|
| C | -0.00107 | 1.13028  | 1.30514  |
| C | -0.25924 | 2.57394  | 0.82879  |
| C | 0.45456  | 2.74254  | -0.52930 |
| N | 0.46655  | 0.47769  | 0.00530  |
| H | -1.33028 | 2.72564  | 0.69427  |
| H | 0.10282  | 3.29184  | 1.56365  |
| C | -1.25392 | 0.45722  | 1.84180  |
| H | -1.08808 | -0.60522 | 2.02679  |
| H | -1.49233 | 0.93215  | 2.79478  |
| H | -2.10744 | 0.59595  | 1.18009  |
| C | 1.11426  | 1.01909  | 2.33837  |
| H | 0.74534  | 1.44769  | 3.27035  |
| H | 1.37117  | -0.02520 | 2.52412  |
| H | 2.00912  | 1.56511  | 2.04525  |
| C | -0.37984 | 3.48503  | -1.57216 |
| H | -0.55980 | 4.50164  | -1.21852 |
| H | 0.15608  | 3.54360  | -2.52108 |
| H | -1.33986 | 2.99635  | -1.73176 |
| C | 1.83270  | 3.41721  | -0.40686 |
| H | 2.37138  | 3.36974  | -1.35487 |
| H | 1.67517  | 4.46530  | -0.14805 |
| H | 2.44610  | 2.95837  | 0.36820  |
| C | 0.82215  | -0.92576 | -0.10698 |
| C | 2.17216  | -1.27519 | 0.04818  |
| C | -0.17436 | -1.86566 | -0.39502 |
| C | 2.49376  | -2.62882 | -0.01681 |
| C | 0.20628  | -3.20459 | -0.45227 |
| C | 1.52111  | -3.58695 | -0.24740 |
| H | 3.52739  | -2.93049 | 0.09747  |
| H | -0.53957 | -3.95536 | -0.68059 |
| H | 1.79328  | -4.63399 | -0.29347 |
| C | -1.59841 | -1.48912 | -0.74699 |
| H | -1.75121 | -0.43546 | -0.52907 |
| C | 3.29585  | -0.26564 | 0.18932  |
| H | 2.87201  | 0.72316  | 0.34229  |
| C | -2.62362 | -2.30307 | 0.04065  |

|   |          |          |          |
|---|----------|----------|----------|
| H | -2.45649 | -2.23035 | 1.11671  |
| H | -3.62979 | -1.94143 | -0.17321 |
| H | -2.58192 | -3.35840 | -0.23595 |
| C | -1.81998 | -1.65785 | -2.25332 |
| H | -1.12739 | -1.03894 | -2.82762 |
| H | -1.67723 | -2.69906 | -2.55159 |
| H | -2.83918 | -1.36401 | -2.51366 |
| C | 4.20340  | -0.56234 | 1.38230  |
| H | 4.93576  | 0.23906  | 1.49458  |
| H | 3.63318  | -0.63801 | 2.30927  |
| H | 4.75234  | -1.49509 | 1.24110  |
| C | 4.10654  | -0.21290 | -1.10903 |
| H | 4.57714  | -1.17800 | -1.30934 |
| H | 3.47278  | 0.04047  | -1.96132 |
| H | 4.89290  | 0.54018  | -1.02970 |
| C | 0.68592  | 1.32659  | -0.92202 |
| H | 1.06920  | 0.99998  | -1.88466 |
| F | -4.73255 | -0.23762 | 1.93739  |
| H | -4.72273 | -0.01705 | 0.95331  |
| F | -4.72970 | 0.27870  | -0.33261 |
| H | -3.73588 | 0.97914  | -0.77312 |
| F | -2.96415 | 1.53837  | -1.13185 |

**Method DSD-PBEP86/TZVP**

**1A:**  $\Delta G = -2452673.6$  kJ/mol

|   |          |          |          |
|---|----------|----------|----------|
| C | 1.10611  | 0.48869  | 1.46126  |
| C | 2.46767  | 1.07095  | 1.03754  |
| C | 2.72222  | 0.63277  | -0.41577 |
| N | 0.47640  | 0.22043  | 0.14381  |
| H | 2.41691  | 2.16145  | 1.07797  |
| H | 3.26747  | 0.74796  | 1.70592  |
| C | 0.31971  | 1.49224  | 2.30263  |
| H | -0.67623 | 1.10787  | 2.53365  |
| H | 0.84221  | 1.65449  | 3.24763  |
| H | 0.22191  | 2.45450  | 1.80184  |
| C | 1.23642  | -0.79214 | 2.29036  |
| H | 1.65849  | -0.55141 | 3.26776  |
| H | 0.25158  | -1.23680 | 2.45244  |
| H | 1.87777  | -1.53566 | 1.82046  |
| C | 3.52934  | 1.67005  | -1.18942 |
| H | 4.53152  | 1.74096  | -0.76078 |
| H | 3.63177  | 1.38376  | -2.23869 |
| H | 3.06898  | 2.65592  | -1.14451 |
| C | 3.46013  | -0.70594 | -0.49800 |
| H | 3.56461  | -1.02120 | -1.53881 |
| H | 4.46078  | -0.59651 | -0.07517 |
| H | 2.95711  | -1.50287 | 0.04623  |
| C | -0.85135 | -0.28564 | -0.00932 |
| C | -1.06264 | -1.67576 | -0.12407 |

|   |          |          |          |
|---|----------|----------|----------|
| C | -1.94890 | 0.59785  | -0.07347 |
| C | -2.36562 | -2.15929 | -0.22147 |
| C | -3.23644 | 0.06854  | -0.16233 |
| C | -3.45062 | -1.29813 | -0.22007 |
| H | -2.52958 | -3.22692 | -0.31075 |
| H | -4.08298 | 0.74365  | -0.20684 |
| H | -4.45822 | -1.68990 | -0.28852 |
| C | -1.79293 | 2.10472  | -0.14242 |
| H | -0.74166 | 2.33754  | -0.00383 |
| C | 0.08122  | -2.66336 | -0.22689 |
| H | 1.00143  | -2.12037 | -0.03578 |
| C | -2.60632 | 2.83411  | 0.92735  |
| H | -2.38295 | 2.46660  | 1.92953  |
| H | -2.38400 | 3.90309  | 0.90029  |
| H | -3.67864 | 2.71650  | 0.75598  |
| C | -2.19154 | 2.60687  | -1.53371 |
| H | -1.61440 | 2.10851  | -2.31364 |
| H | -3.25230 | 2.42528  | -1.72307 |
| H | -2.01457 | 3.68199  | -1.61196 |
| C | -0.02496 | -3.79899 | 0.79043  |
| H | 0.86758  | -4.42665 | 0.74470  |
| H | -0.12253 | -3.42008 | 1.80884  |
| H | -0.88735 | -4.43584 | 0.58216  |
| C | 0.16459  | -3.23096 | -1.64713 |
| H | -0.73325 | -3.80590 | -1.88698 |
| H | 0.26515  | -2.43544 | -2.38818 |
| H | 1.02641  | -3.89560 | -1.73977 |
| C | 1.29511  | 0.46611  | -0.95461 |
| H | 1.19724  | -0.28206 | -1.74544 |
| F | 0.89760  | 1.68219  | -1.63201 |

**2Ba:**  $\Delta G = -2716234.6$  kJ/mol

|   |          |          |          |
|---|----------|----------|----------|
| C | 0.61902  | -0.87037 | -1.91327 |
| C | 1.94501  | -1.61146 | -1.65433 |
| C | 2.47735  | -1.13146 | -0.28638 |
| N | 0.29898  | -0.36591 | -0.51243 |
| H | 1.75553  | -2.68457 | -1.61276 |
| H | 2.65779  | -1.41946 | -2.45497 |
| C | -0.48058 | -1.78324 | -2.42856 |
| H | -1.43725 | -1.26083 | -2.48279 |
| H | -0.20670 | -2.08957 | -3.43895 |
| H | -0.58650 | -2.68119 | -1.82348 |
| C | 0.76448  | 0.32294  | -2.84994 |
| H | 0.95153  | -0.06177 | -3.85274 |
| H | -0.15495 | 0.91031  | -2.87860 |
| H | 1.59718  | 0.96675  | -2.57081 |
| C | 2.96039  | -2.27526 | 0.60503  |
| H | 3.81224  | -2.76343 | 0.12918  |
| H | 3.27627  | -1.89665 | 1.57865  |
| H | 2.17411  | -3.01729 | 0.75294  |

|   |          |          |          |
|---|----------|----------|----------|
| C | 3.56755  | -0.05503 | -0.39744 |
| H | 3.81576  | 0.33928  | 0.58884  |
| H | 4.45986  | -0.50835 | -0.83181 |
| H | 3.25163  | 0.77119  | -1.03547 |
| C | -0.95192 | 0.26905  | -0.15286 |
| C | -1.03652 | 1.66547  | -0.21641 |
| C | -2.00691 | -0.54086 | 0.28332  |
| C | -2.26881 | 2.24136  | 0.08477  |
| C | -3.21487 | 0.08847  | 0.57358  |
| C | -3.35263 | 1.46199  | 0.45501  |
| H | -2.37071 | 3.31876  | 0.04902  |
| H | -4.05141 | -0.50721 | 0.91741  |
| H | -4.30183 | 1.93074  | 0.68261  |
| C | -1.85743 | -2.02485 | 0.55781  |
| H | -0.88736 | -2.35762 | 0.19278  |
| C | 0.15942  | 2.56181  | -0.47375 |
| H | 0.99344  | 1.95451  | -0.81881 |
| C | -2.93794 | -2.85655 | -0.13130 |
| H | -2.97848 | -2.65647 | -1.20285 |
| H | -2.73416 | -3.91932 | 0.01112  |
| H | -3.92264 | -2.64794 | 0.29128  |
| C | -1.87035 | -2.26734 | 2.07027  |
| H | -1.07587 | -1.70628 | 2.56631  |
| H | -2.82549 | -1.96134 | 2.50265  |
| H | -1.72539 | -3.32875 | 2.28026  |
| C | -0.11800 | 3.62143  | -1.53826 |
| H | 0.79633  | 4.17782  | -1.75186 |
| H | -0.46990 | 3.17329  | -2.46878 |
| H | -0.86901 | 4.33711  | -1.19886 |
| C | 0.59455  | 3.21312  | 0.84303  |
| H | -0.20001 | 3.85025  | 1.23827  |
| H | 0.83305  | 2.45859  | 1.59571  |
| H | 1.47983  | 3.83124  | 0.68092  |
| C | 1.26948  | -0.49813 | 0.30345  |
| H | 1.17638  | -0.13914 | 1.32636  |
| F | 0.52453  | 0.48555  | 3.25230  |
| H | 1.64076  | 0.69490  | 3.08178  |
| F | 2.72050  | 0.87057  | 2.85939  |

**3Bc:**  $\Delta G = -2979777.2$  kJ/mol

|   |          |          |          |
|---|----------|----------|----------|
| C | -2.26757 | -0.14722 | 1.00956  |
| C | -3.28468 | -0.34696 | -0.13134 |
| C | -2.56373 | 0.00229  | -1.45145 |
| N | -0.96336 | -0.11023 | 0.22331  |
| H | -3.59812 | -1.39118 | -0.15613 |
| H | -4.16629 | 0.27340  | 0.02308  |
| C | -2.26010 | -1.29624 | 2.00497  |
| H | -1.45457 | -1.18761 | 2.73323  |
| H | -3.20801 | -1.26889 | 2.54388  |
| H | -2.18117 | -2.26415 | 1.51396  |

|   |          |          |          |
|---|----------|----------|----------|
| C | -2.44828 | 1.16825  | 1.75703  |
| H | -3.36141 | 1.09037  | 2.34767  |
| H | -1.61721 | 1.34750  | 2.44152  |
| H | -2.55137 | 2.01559  | 1.08132  |
| C | -2.82450 | -1.00707 | -2.56843 |
| H | -3.88637 | -0.99663 | -2.81906 |
| H | -2.25507 | -0.74648 | -3.46245 |
| H | -2.55173 | -2.01717 | -2.25908 |
| C | -2.86216 | 1.42576  | -1.94801 |
| H | -2.23656 | 1.67352  | -2.80672 |
| H | -3.90823 | 1.47431  | -2.25415 |
| H | -2.69310 | 2.16753  | -1.16670 |
| C | 0.34021  | -0.10691 | 0.85330  |
| C | 0.93620  | 1.12431  | 1.15117  |
| C | 0.95374  | -1.33671 | 1.11534  |
| C | 2.15180  | 1.09303  | 1.83105  |
| C | 2.16961  | -1.30939 | 1.79418  |
| C | 2.75056  | -0.10929 | 2.17139  |
| H | 2.64594  | 2.02486  | 2.07544  |
| H | 2.67625  | -2.24163 | 2.01028  |
| H | 3.69394  | -0.11038 | 2.70294  |
| C | 0.42062  | -2.65322 | 0.58565  |
| H | -0.59235 | -2.50453 | 0.21614  |
| C | 0.39041  | 2.44669  | 0.64954  |
| H | -0.63230 | 2.30295  | 0.30841  |
| C | 0.37590  | -3.74271 | 1.65460  |
| H | -0.18975 | -3.41912 | 2.53017  |
| H | -0.10100 | -4.63738 | 1.25057  |
| H | 1.37988  | -4.02048 | 1.98034  |
| C | 1.27078  | -3.08984 | -0.61190 |
| H | 1.24711  | -2.33796 | -1.40414 |
| H | 2.31103  | -3.23830 | -0.31325 |
| H | 0.89253  | -4.02976 | -1.01840 |
| C | 0.37427  | 3.53154  | 1.72332  |
| H | -0.10952 | 4.42842  | 1.33264  |
| H | -0.17225 | 3.20801  | 2.61085  |
| H | 1.38557  | 3.80761  | 2.02677  |
| C | 1.20768  | 2.88864  | -0.56883 |
| H | 2.25176  | 3.05521  | -0.29318 |
| H | 1.17879  | 2.12957  | -1.35352 |
| H | 0.80581  | 3.81906  | -0.97513 |
| C | -1.13656 | -0.04103 | -1.03776 |
| H | -0.28057 | -0.00929 | -1.71199 |
| F | 0.35556  | 1.85488  | -3.96488 |
| H | 0.81738  | 1.09025  | -3.51077 |
| F | 1.38463  | 0.04968  | -2.90796 |
| H | 2.39382  | 0.02269  | -2.04726 |
| F | 3.15483  | -0.02455 | -1.39490 |

**Method DSD-PBEP86/TZVPP**



1A:  $\Delta G = -2452683.6$  kJ/mol

|   |          |          |          |
|---|----------|----------|----------|
| C | 1.10611  | 0.48869  | 1.46126  |
| C | 2.46767  | 1.07095  | 1.03754  |
| C | 2.72222  | 0.63277  | -0.41577 |
| N | 0.47640  | 0.22043  | 0.14381  |
| H | 2.41691  | 2.16145  | 1.07797  |
| H | 3.26747  | 0.74796  | 1.70592  |
| C | 0.31971  | 1.49224  | 2.30263  |
| H | -0.67623 | 1.10787  | 2.53365  |
| H | 0.84221  | 1.65449  | 3.24763  |
| H | 0.22191  | 2.45450  | 1.80184  |
| C | 1.23642  | -0.79214 | 2.29036  |
| H | 1.65849  | -0.55141 | 3.26776  |
| H | 0.25158  | -1.23680 | 2.45244  |
| H | 1.87777  | -1.53566 | 1.82046  |
| C | 3.52934  | 1.67005  | -1.18942 |
| H | 4.53152  | 1.74096  | -0.76078 |
| H | 3.63177  | 1.38376  | -2.23869 |
| H | 3.06898  | 2.65592  | -1.14451 |
| C | 3.46013  | -0.70594 | -0.49800 |
| H | 3.56461  | -1.02120 | -1.53881 |
| H | 4.46078  | -0.59651 | -0.07517 |
| H | 2.95711  | -1.50287 | 0.04623  |
| C | -0.85135 | -0.28564 | -0.00932 |
| C | -1.06264 | -1.67576 | -0.12407 |
| C | -1.94890 | 0.59785  | -0.07347 |
| C | -2.36562 | -2.15929 | -0.22147 |
| C | -3.23644 | 0.06854  | -0.16233 |
| C | -3.45062 | -1.29813 | -0.22007 |
| H | -2.52958 | -3.22692 | -0.31075 |
| H | -4.08298 | 0.74365  | -0.20684 |
| H | -4.45822 | -1.68990 | -0.28852 |
| C | -1.79293 | 2.10472  | -0.14242 |
| H | -0.74166 | 2.33754  | -0.00383 |
| C | 0.08122  | -2.66336 | -0.22689 |
| H | 1.00143  | -2.12037 | -0.03578 |
| C | -2.60632 | 2.83411  | 0.92735  |
| H | -2.38295 | 2.46660  | 1.92953  |
| H | -2.38400 | 3.90309  | 0.90029  |
| H | -3.67864 | 2.71650  | 0.75598  |
| C | -2.19154 | 2.60687  | -1.53371 |
| H | -1.61440 | 2.10851  | -2.31364 |
| H | -3.25230 | 2.42528  | -1.72307 |
| H | -2.01457 | 3.68199  | -1.61196 |
| C | -0.02496 | -3.79899 | 0.79043  |
| H | 0.86758  | -4.42665 | 0.74470  |
| H | -0.12253 | -3.42008 | 1.80884  |
| H | -0.88735 | -4.43584 | 0.58216  |
| C | 0.16459  | -3.23096 | -1.64713 |

|   |          |          |          |
|---|----------|----------|----------|
| H | -0.73325 | -3.80590 | -1.88698 |
| H | 0.26515  | -2.43544 | -2.38818 |
| H | 1.02641  | -3.89560 | -1.73977 |
| C | 1.29511  | 0.46611  | -0.95461 |
| H | 1.19724  | -0.28206 | -1.74544 |
| F | 0.89760  | 1.68219  | -1.63201 |

**2Ba:**  $\Delta G = -2717388.9$  kJ/mol

|   |          |          |          |
|---|----------|----------|----------|
| C | 0.61902  | -0.87037 | -1.91327 |
| C | 1.94501  | -1.61146 | -1.65433 |
| C | 2.47735  | -1.13146 | -0.28638 |
| N | 0.29898  | -0.36591 | -0.51243 |
| H | 1.75553  | -2.68457 | -1.61276 |
| H | 2.65779  | -1.41946 | -2.45497 |
| C | -0.48058 | -1.78324 | -2.42856 |
| H | -1.43725 | -1.26083 | -2.48279 |
| H | -0.20670 | -2.08957 | -3.43895 |
| H | -0.58650 | -2.68119 | -1.82348 |
| C | 0.76448  | 0.32294  | -2.84994 |
| H | 0.95153  | -0.06177 | -3.85274 |
| H | -0.15495 | 0.91031  | -2.87860 |
| H | 1.59718  | 0.96675  | -2.57081 |
| C | 2.96039  | -2.27526 | 0.60503  |
| H | 3.81224  | -2.76343 | 0.12918  |
| H | 3.27627  | -1.89665 | 1.57865  |
| H | 2.17411  | -3.01729 | 0.75294  |
| C | 3.56755  | -0.05503 | -0.39744 |
| H | 3.81576  | 0.33928  | 0.58884  |
| H | 4.45986  | -0.50835 | -0.83181 |
| H | 3.25163  | 0.77119  | -1.03547 |
| C | -0.95192 | 0.26905  | -0.15286 |
| C | -1.03652 | 1.66547  | -0.21641 |
| C | -2.00691 | -0.54086 | 0.28332  |
| C | -2.26881 | 2.24136  | 0.08477  |
| C | -3.21487 | 0.08847  | 0.57358  |
| C | -3.35263 | 1.46199  | 0.45501  |
| H | -2.37071 | 3.31876  | 0.04902  |
| H | -4.05141 | -0.50721 | 0.91741  |
| H | -4.30183 | 1.93074  | 0.68261  |
| C | -1.85743 | -2.02485 | 0.55781  |
| H | -0.88736 | -2.35762 | 0.19278  |
| C | 0.15942  | 2.56181  | -0.47375 |
| H | 0.99344  | 1.95451  | -0.81881 |
| C | -2.93794 | -2.85655 | -0.13130 |
| H | -2.97848 | -2.65647 | -1.20285 |
| H | -2.73416 | -3.91932 | 0.01112  |
| H | -3.92264 | -2.64794 | 0.29128  |
| C | -1.87035 | -2.26734 | 2.07027  |
| H | -1.07587 | -1.70628 | 2.56631  |
| H | -2.82549 | -1.96134 | 2.50265  |

|   |          |          |          |
|---|----------|----------|----------|
| H | -1.72539 | -3.32875 | 2.28026  |
| C | -0.11800 | 3.62143  | -1.53826 |
| H | 0.79633  | 4.17782  | -1.75186 |
| H | -0.46990 | 3.17329  | -2.46878 |
| H | -0.86901 | 4.33711  | -1.19886 |
| C | 0.59455  | 3.21312  | 0.84303  |
| H | -0.20001 | 3.85025  | 1.23827  |
| H | 0.83305  | 2.45859  | 1.59571  |
| H | 1.47983  | 3.83124  | 0.68092  |
| C | 1.26948  | -0.49813 | 0.30345  |
| H | 1.17638  | -0.13914 | 1.32636  |
| F | 0.52453  | 0.48555  | 3.25230  |
| H | 1.64076  | 0.69490  | 3.08178  |
| F | 2.72050  | 0.87057  | 2.85939  |

**3Bc:**  $\Delta G = -2980961.5$  kJ/mol

|   |          |          |          |
|---|----------|----------|----------|
| C | -2.26757 | -0.14722 | 1.00956  |
| C | -3.28468 | -0.34696 | -0.13134 |
| C | -2.56373 | 0.00229  | -1.45145 |
| N | -0.96336 | -0.11023 | 0.22331  |
| H | -3.59812 | -1.39118 | -0.15613 |
| H | -4.16629 | 0.27340  | 0.02308  |
| C | -2.26010 | -1.29624 | 2.00497  |
| H | -1.45457 | -1.18761 | 2.73323  |
| H | -3.20801 | -1.26889 | 2.54388  |
| H | -2.18117 | -2.26415 | 1.51396  |
| C | -2.44828 | 1.16825  | 1.75703  |
| H | -3.36141 | 1.09037  | 2.34767  |
| H | -1.61721 | 1.34750  | 2.44152  |
| H | -2.55137 | 2.01559  | 1.08132  |
| C | -2.82450 | -1.00707 | -2.56843 |
| H | -3.88637 | -0.99663 | -2.81906 |
| H | -2.25507 | -0.74648 | -3.46245 |
| H | -2.55173 | -2.01717 | -2.25908 |
| C | -2.86216 | 1.42576  | -1.94801 |
| H | -2.23656 | 1.67352  | -2.80672 |
| H | -3.90823 | 1.47431  | -2.25415 |
| H | -2.69310 | 2.16753  | -1.16670 |
| C | 0.34021  | -0.10691 | 0.85330  |
| C | 0.93620  | 1.12431  | 1.15117  |
| C | 0.95374  | -1.33671 | 1.11534  |
| C | 2.15180  | 1.09303  | 1.83105  |
| C | 2.16961  | -1.30939 | 1.79418  |
| C | 2.75056  | -0.10929 | 2.17139  |
| H | 2.64594  | 2.02486  | 2.07544  |
| H | 2.67625  | -2.24163 | 2.01028  |
| H | 3.69394  | -0.11038 | 2.70294  |
| C | 0.42062  | -2.65322 | 0.58565  |
| H | -0.59235 | -2.50453 | 0.21614  |
| C | 0.39041  | 2.44669  | 0.64954  |

|   |          |          |          |
|---|----------|----------|----------|
| H | -0.63230 | 2.30295  | 0.30841  |
| C | 0.37590  | -3.74271 | 1.65460  |
| H | -0.18975 | -3.41912 | 2.53017  |
| H | -0.10100 | -4.63738 | 1.25057  |
| H | 1.37988  | -4.02048 | 1.98034  |
| C | 1.27078  | -3.08984 | -0.61190 |
| H | 1.24711  | -2.33796 | -1.40414 |
| H | 2.31103  | -3.23830 | -0.31325 |
| H | 0.89253  | -4.02976 | -1.01840 |
| C | 0.37427  | 3.53154  | 1.72332  |
| H | -0.10952 | 4.42842  | 1.33264  |
| H | -0.17225 | 3.20801  | 2.61085  |
| H | 1.38557  | 3.80761  | 2.02677  |
| C | 1.20768  | 2.88864  | -0.56883 |
| H | 2.25176  | 3.05521  | -0.29318 |
| H | 1.17879  | 2.12957  | -1.35352 |
| H | 0.80581  | 3.81906  | -0.97513 |
| C | -1.13656 | -0.04103 | -1.03776 |
| H | -0.28057 | -0.00929 | -1.71199 |
| F | 0.35556  | 1.85488  | -3.96488 |
| H | 0.81738  | 1.09025  | -3.51077 |
| F | 1.38463  | 0.04968  | -2.90796 |
| H | 2.39382  | 0.02269  | -2.04726 |
| F | 3.15483  | -0.02455 | -1.39490 |

## S5 References

- 1 A. Bauzá, D. Quiñonero, P. M. Deyà and A. Frontera, *J. Phys. Chem. A*, 2013, **117**, 2651–2655.
- 2 S. Kozuch and J. M. L. Martin, *J. Comput. Chem.*, 2013, **34**, 2327–2344.
- 3 J. Hu, B. Gao, L. Li, C. Ni and J. Hu, *Org. Lett.*, 2015, **17**, 3086–3089.
- 4 P. A. Champagne, Y. Benhassine, J. Desroches and J. F. Paquin, *Angew. Chem. Int. Ed.*, 2014, **53**, 13835–13839.
- 5 G. Blessley, P. Holden, M. Walker, J. M. Brown and V. Gouverneur, *Org. Lett.*, 2012, **14**, 2754–2757.
- 6 B. Alič, J. Petrovčič, J. Jelen, G. Tavčar and J. Iskra, *J. Org. Chem.*, 2022, **87**, 5987–5993.
- 7 J. Chen, J.-H. Lin and J.-C. Xiao, *Org. Lett.*, 2018, **20**, 3061–3064.
- 8 K. Dempsey, R. Mir, I. Smajlagić and T. Dudding, *Tetrahedron*, 2018, **74**, 3507–3511.
- 9 D. R. Willcox, G. S. Nichol and S. P. Thomas, *ACS Catal.*, 2021, **11**, 3190–3197.
- 10 S. Manna, S. Maity, S. Rana, S. Agasti and D. Maiti, *Org. Lett.*, 2012, **14**, 1736–1739.
- 11 T. Scattolin, K. Deckers and F. Schoenebeck, *Org. Lett.*, 2017, **19**, 5740–5743.
- 12 K. Pomeisl, J. Čejka, J. Kvičala and O. Paleta, *Eur. J. Org. Chem.*, 2007, **2007**, 5917–5925.
- 13 J. Kwon and B. Moon Kim, *Org. Lett.*, 2018, **21**, 428–433.
- 14 M. Colella, A. Tota, Y. Takahashi, R. Higuma, S. Ishikawa, L. Degennaro, R. Luisi and A. Nagaki, *Angew. Chem. Int. Ed.*, 2020, **59**, 10924–10928.
- 15 M. Mąkosza and R. Bujok, *J. Fluor. Chem.*, 2005, **126**, 209–216.
